# Supplementary material
Source: PubMed Central journal article supplement (PMC3946489)

**Supporting Information for:**

**Nickel or Phenanthroline Mediated Intramolecular Arylation of  $\text{sp}^3$  C–H  
Bonds Using Aryl Halides**

William C. Wertjes<sup>\$</sup>, Lydia C. Wolfe<sup>\$</sup>, Peter J. Waller and Dipannita Kalyani\*

*St Olaf College, Department of Chemistry, 1520 St. Olaf Avenue, Northfield, MN 55057*

$^1\text{H}$  NMR and  $^{13}\text{C}$  NMR spectra

DK-IV-JY-45 Concentrated

user: we...  
team: research-kalyani holder: 7  
solvent: CDCl3 expt: PROTON NS=16;SW=20;  
standard 1H experiment ()

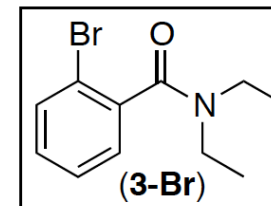

Current Data Parameters  
NAME Jul23-2013  
EXPNO 1563510  
PROCNO 1

F2 - Acquisition Parameters  
Date\_ 20130723  
Time 17.40  
INSTRUM spect  
PROBHD 5 mm BBO 1H/13  
PULPROG zg30  
TD 65536  
SOLVENT CDCl3  
NS 16  
DS 2  
SWH 8012.820 Hz  
FIDRES 0.122266 Hz  
AQ 4.0894966 sec  
RG 71.8  
DW 62.400 usec  
DE 6.00 usec  
TE 300.0 K  
D1 1.00000000 sec

===== CHANNEL f1 =====  
NUC1 1H  
P1 11.75 usec  
PL1 -4.00 dB  
SFO1 400.1324710 MHz

F2 - Processing parameters  
SI 32768  
SF 400.1300000 MHz  
WDW EM  
SSB 0  
LB 0.30 Hz  
GB 0  
PC 1.00

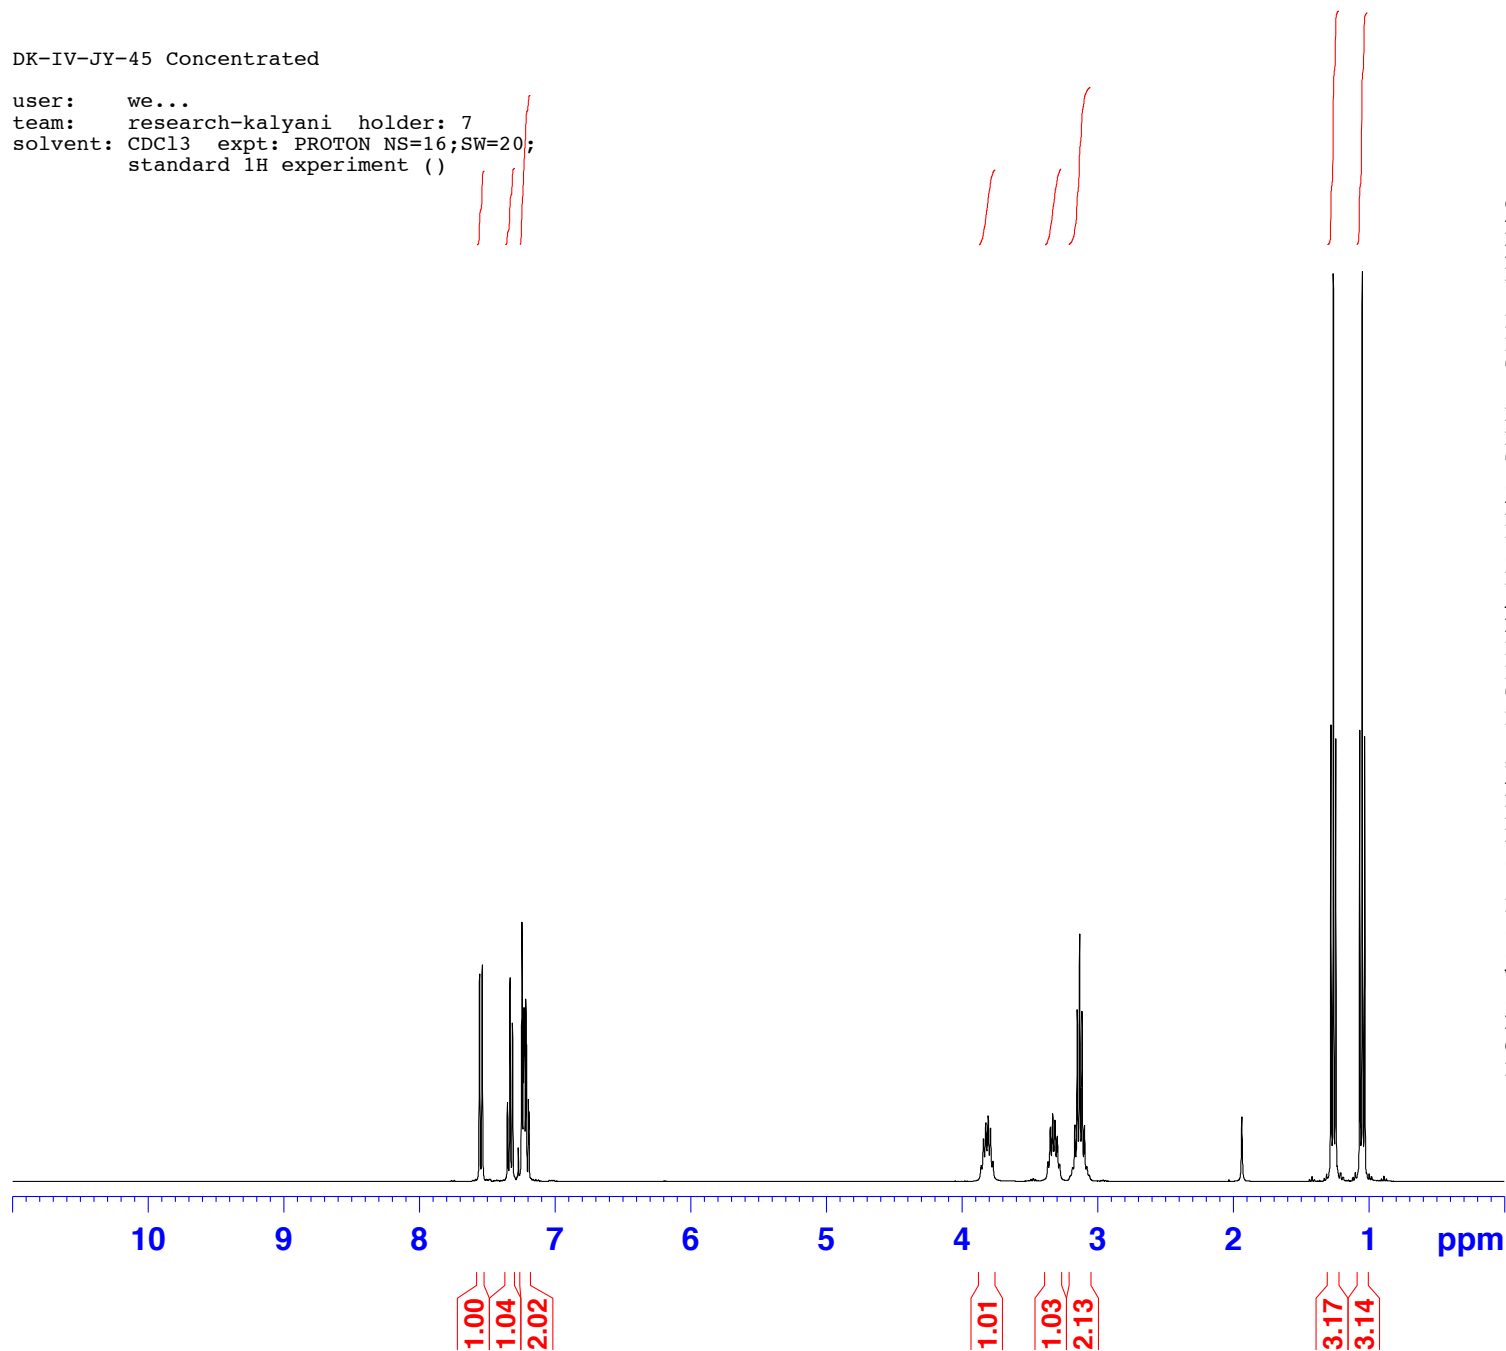

DK-IV-JY-45 Concentrated

user: we...  
team: research-kalyani holder: 7  
solvent: CDCl3 expt: C13CPD32 NS=2048;D1=2;  
standard C13 experiment ()

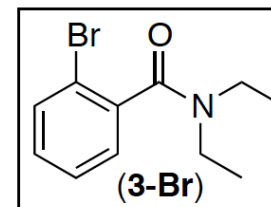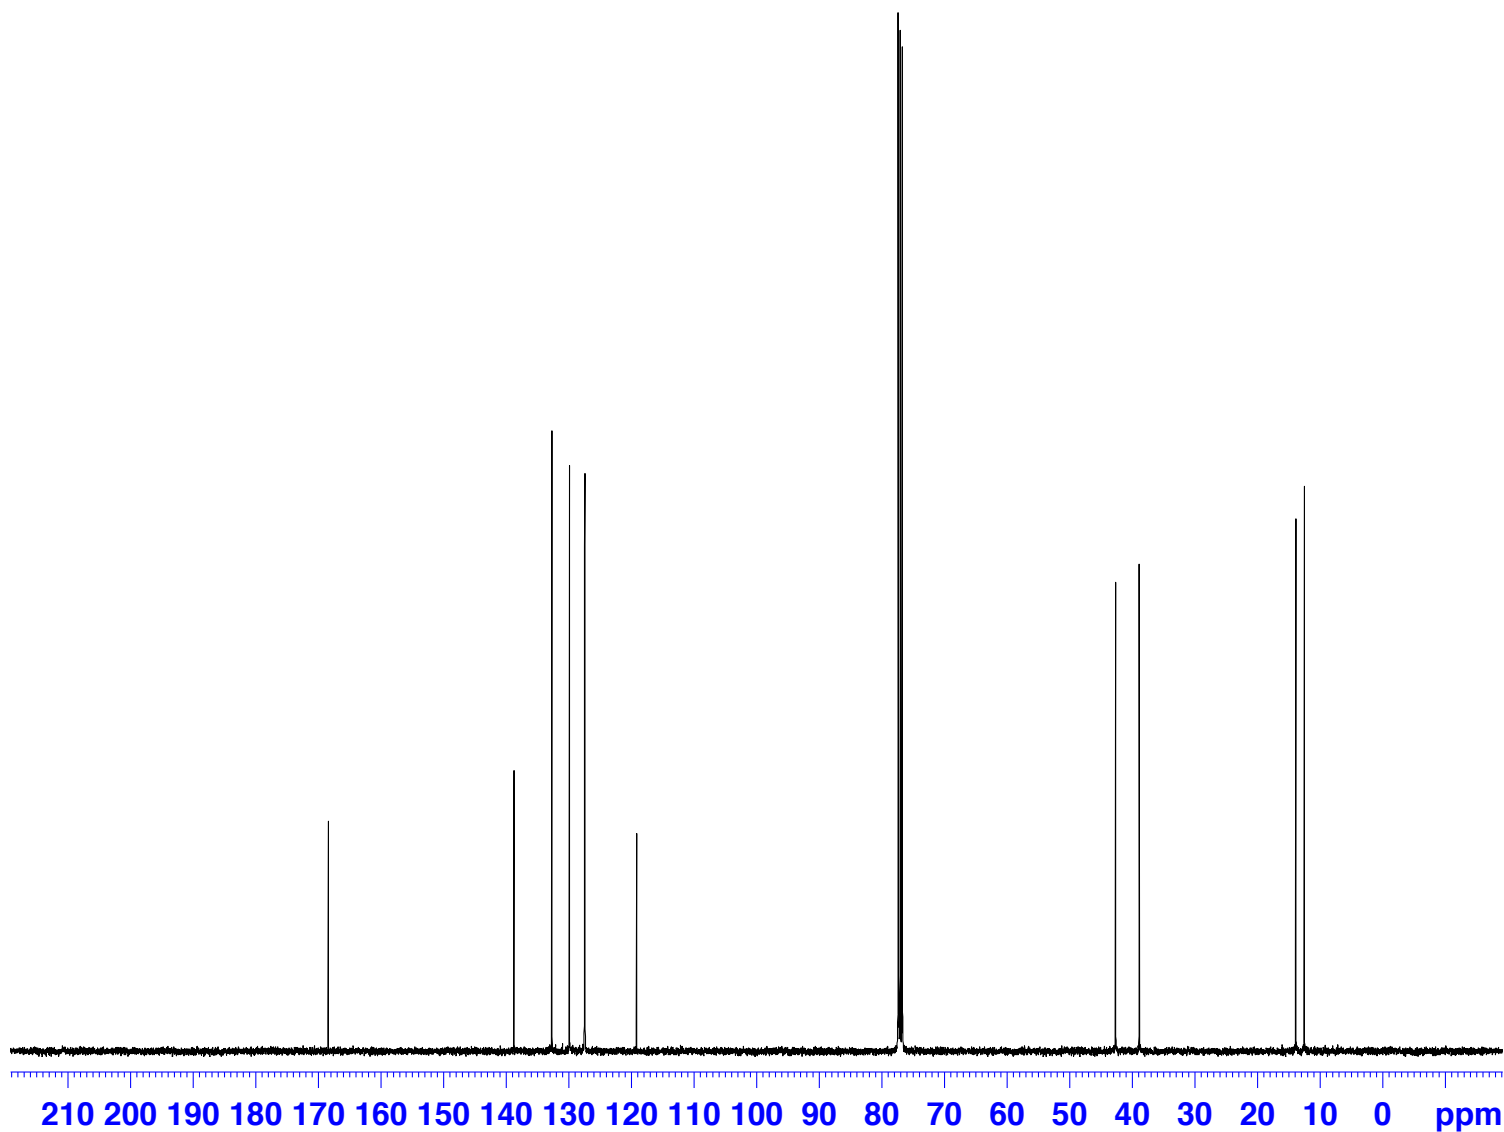

Current Data Parameters  
NAME Jul23-2013  
EXPNO 1563610  
PROCNO 1

F2 - Acquisition Parameters  
Date\_ 20130723  
Time 19.36  
INSTRUM spect  
PROBHD 5 mm BBO 1H/13  
PULPROG zgpg30  
TD 65536  
SOLVENT CDCl3  
NS 2048  
DS 2  
SWH 23980.814 Hz  
FIDRES 0.365918 Hz  
AQ 1.3664756 sec  
RG 4096  
DW 20.850 usec  
DE 6.00 usec  
TE 300.0 K  
D1 2.00000000 sec  
d11 0.03000000 sec  
d12 0.00002000 sec

===== CHANNEL f1 =====  
NUC1 13C  
P1 9.00 usec  
PL1 -4.50 dB  
SFO1 100.6228298 MHz

===== CHANNEL f2 =====  
CPDPRG2 waltz16  
NUC2 1H  
PCPD2 90.00 usec  
PL2 -4.00 dB  
PL12 13.68 dB  
PL13 17.24 dB  
SFO2 400.1316005 MHz

F2 - Processing parameters  
SI 32768  
SF 100.6127690 MHz  
WDW EM

DK-XII-WW-25\_concentrated

user: wo...  
team: research-kalyani-wolfel holder: 7  
solvent: CDCl3 expt: PROTON NS=128;SW=20;  
standard 1H experiment ()

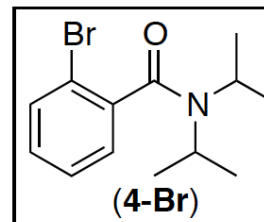

Current Data Parameters  
NAME Jun19-2013  
EXPNO 1490110  
PROCNO 1

F2 - Acquisition Parameters  
Date\_ 20130619  
Time 18.05  
INSTRUM spect  
PROBHD 5 mm BBO 1H/13  
PULPROG zg30  
TD 65536  
SOLVENT CDCl3  
NS 128  
DS 2  
SWH 8012.820 Hz  
FIDRES 0.122266 Hz  
AQ 4.0894966 sec  
RG 71.8  
DW 62.400 usec  
DE 6.00 usec  
TE 300.0 K  
D1 1.00000000 sec

===== CHANNEL f1 =====  
NUC1 1H  
P1 11.75 usec  
PL1 -4.00 dB  
SFO1 400.1324710 MHz

F2 - Processing parameters  
SI 32768  
SF 400.1300000 MHz  
WDW EM  
SSB 0  
LB 0.30 Hz  
GB 0  
PC 1.00

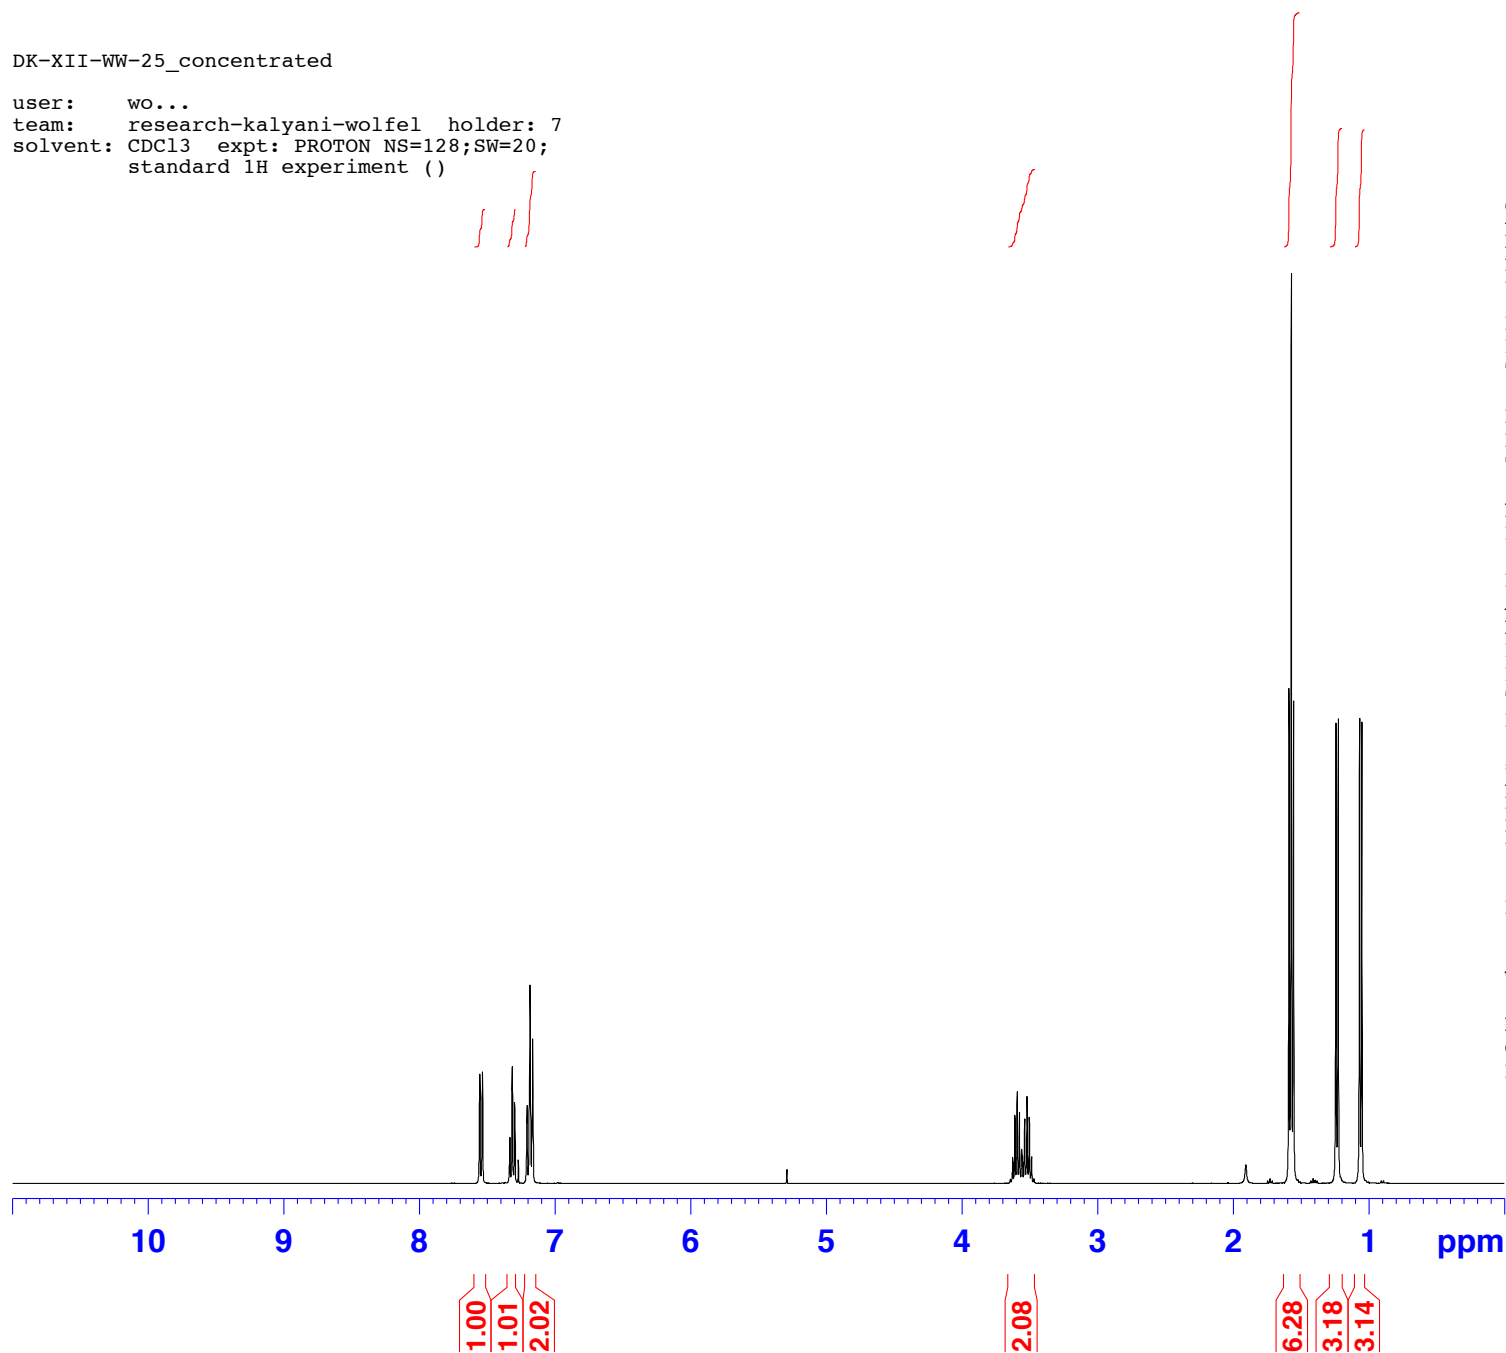

DK-XII-WW-25\_concentrated

user: WO...  
team: research-kalyani-wolfel holder: 7  
solvent: CDCl3 expt: C13CPD32 NS=2048;D1=2;  
standard C13 experiment ()

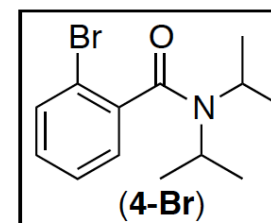

Current Data Parameters  
NAME Jun19-2013  
EXPNO 1490210  
PROCNO 1

F2 - Acquisition Parameters  
Date\_ 20130619  
Time 20.02  
INSTRUM spect  
PROBHD 5 mm BBO 1H/13  
PULPROG zgpg30  
TD 65536  
SOLVENT CDCl3  
NS 2048  
DS 2  
SWH 23980.814 Hz  
FIDRES 0.365918 Hz  
AQ 1.3664756 sec  
RG 1448.2  
DW 20.850 usec  
DE 6.00 usec  
TE 300.0 K  
D1 2.00000000 sec  
d11 0.03000000 sec  
d12 0.00002000 sec

===== CHANNEL f1 =====  
NUC1 13C  
P1 9.00 usec  
PL1 -4.50 dB  
SFO1 100.6228298 MHz

===== CHANNEL f2 =====  
CPDPRG2 waltz16  
NUC2 1H  
PCPD2 90.00 usec  
PL2 -4.00 dB  
PL12 13.68 dB  
PL13 17.24 dB  
SFO2 400.1316005 MHz

F2 - Processing parameters  
SI 32768  
SF 100.6127690 MHz  
WDW EM

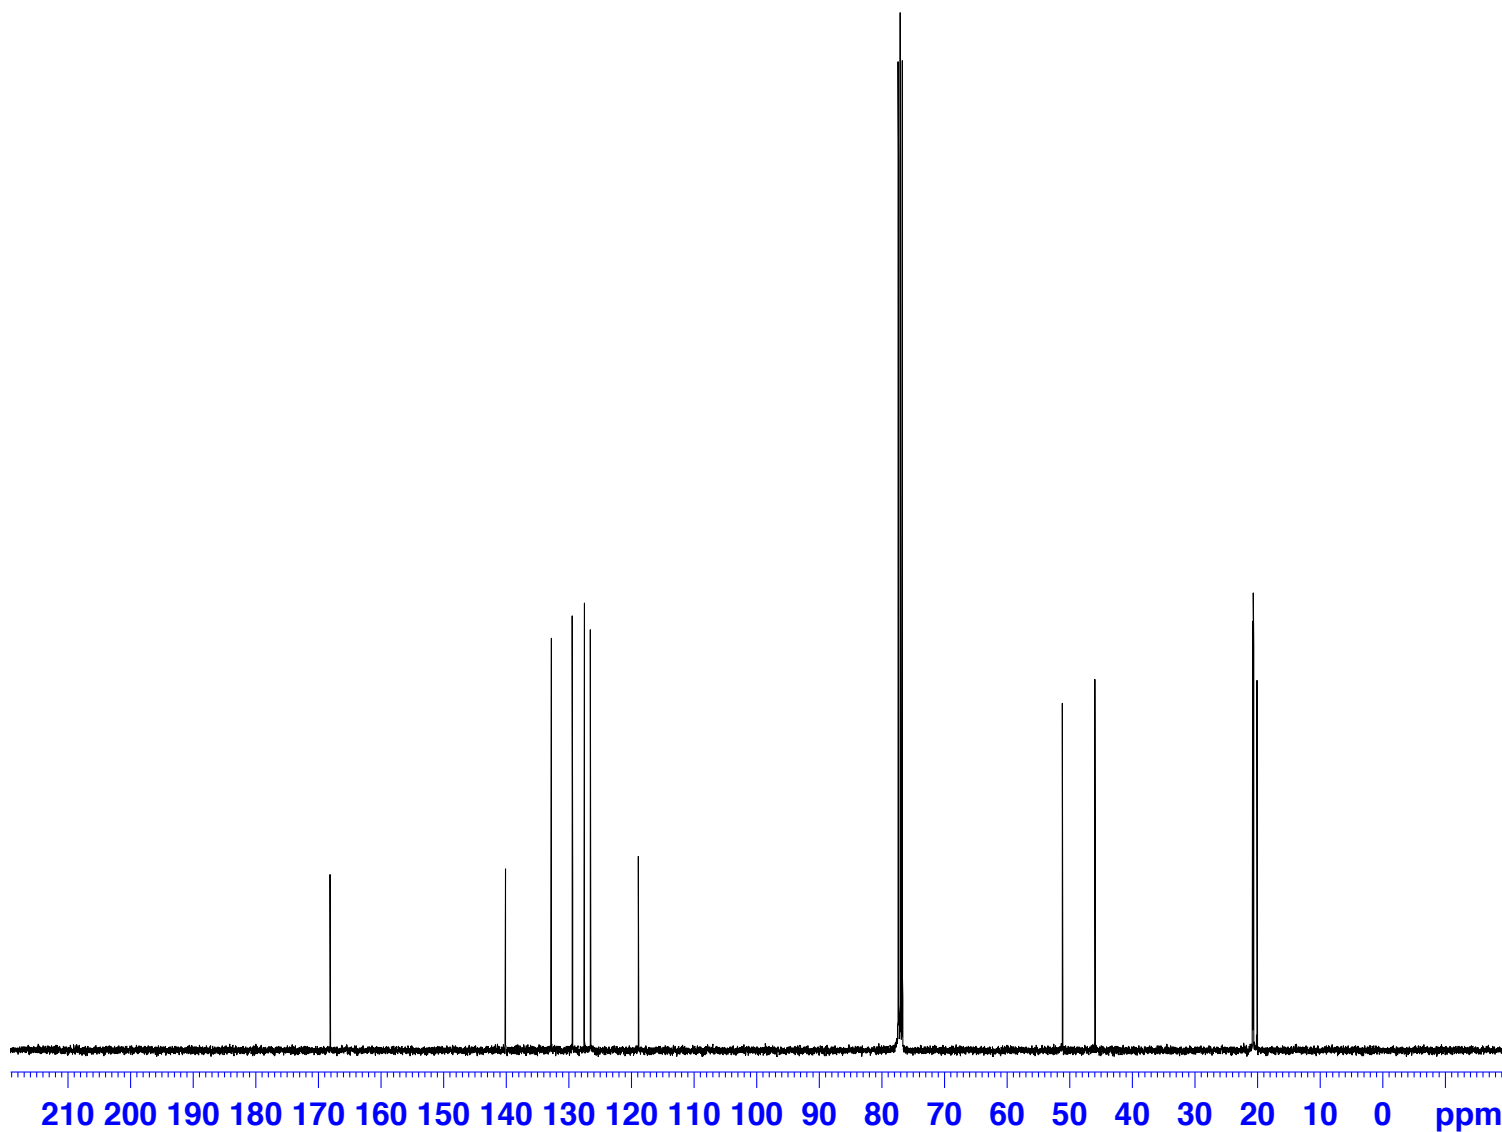

DK-XI-PW-28 Concentrated and Dried

user: we...  
team: research-kalyani-wertjes holder: 5  
solvent: CDCl3 expt: PROTON NS=16;SW=20;  
standard 1H experiment ()

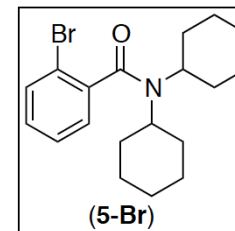

Current Data Parameters  
NAME Jun22-2013  
EXPNO 1496410  
PROCNO 1

F2 - Acquisition Parameters  
Date\_ 20130622  
Time 17.09  
INSTRUM spect  
PROBHD 5 mm BBO 1H/13  
PULPROG zg30  
TD 65536  
SOLVENT CDCl3  
NS 16  
DS 2  
SWH 8012.820 Hz  
FIDRES 0.122266 Hz  
AQ 4.0894966 sec  
RG 50.8  
DW 62.400 usec  
DE 6.00 usec  
TE 300.0 K  
D1 1.00000000 sec

===== CHANNEL f1 =====  
NUC1 1H  
P1 11.75 usec  
PL1 -4.00 dB  
SFO1 400.1324710 MHz

F2 - Processing parameters  
SI 32768  
SF 400.1300000 MHz  
WDW EM  
SSB 0  
LB 0.30 Hz  
GB 0  
PC 1.00

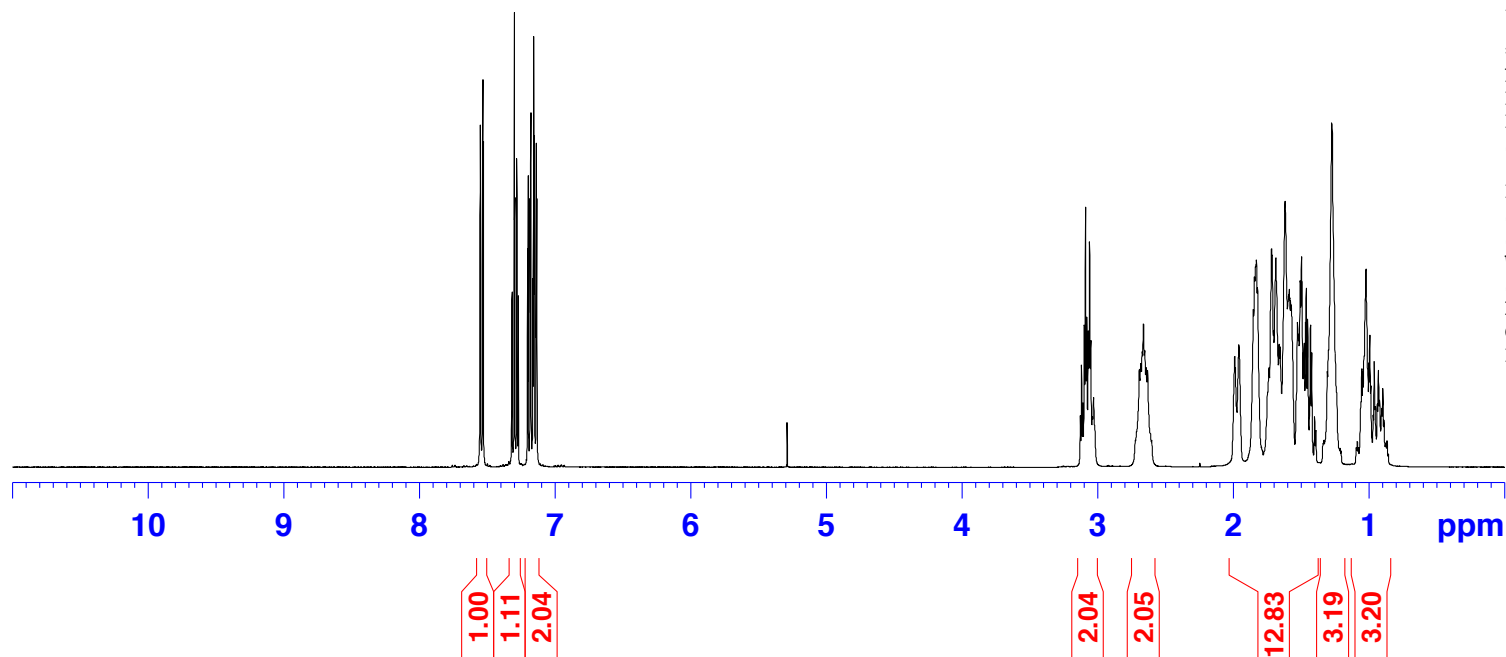

DK-XI-PW-28 Concentrated and Dried

user: we...  
team: research-kalyani-wertjes holder: 5  
solvent: CDCl3 expt: C13CPD32 NS=2048;D1=2;  
standard C13 experiment ()

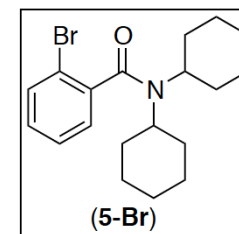

Current Data Parameters  
NAME Jun22-2013  
EXPNO 1496510  
PROCNO 1

F2 - Acquisition Parameters  
Date\_ 20130622  
Time 19.05  
INSTRUM spect  
PROBHD 5 mm BBO 1H/13  
PULPROG zgpg30  
TD 65536  
SOLVENT CDCl3  
NS 2048  
DS 2  
SWH 23980.814 Hz  
FIDRES 0.365918 Hz  
AQ 1.3664756 sec  
RG 1290.2  
DW 20.850 usec  
DE 6.00 usec  
TE 300.0 K  
D1 2.00000000 sec  
d11 0.03000000 sec  
d12 0.00002000 sec

===== CHANNEL f1 =====  
NUC1 13C  
P1 9.00 usec  
PL1 -4.50 dB  
SFO1 100.6228298 MHz

===== CHANNEL f2 =====  
CPDPRG2 waltz16  
NUC2 1H  
PCPD2 90.00 usec  
PL2 -4.00 dB  
PL12 13.68 dB  
PL13 17.24 dB  
SFO2 400.1316005 MHz

F2 - Processing parameters  
SI 32768  
SF 100.6127690 MHz  
WDW EM

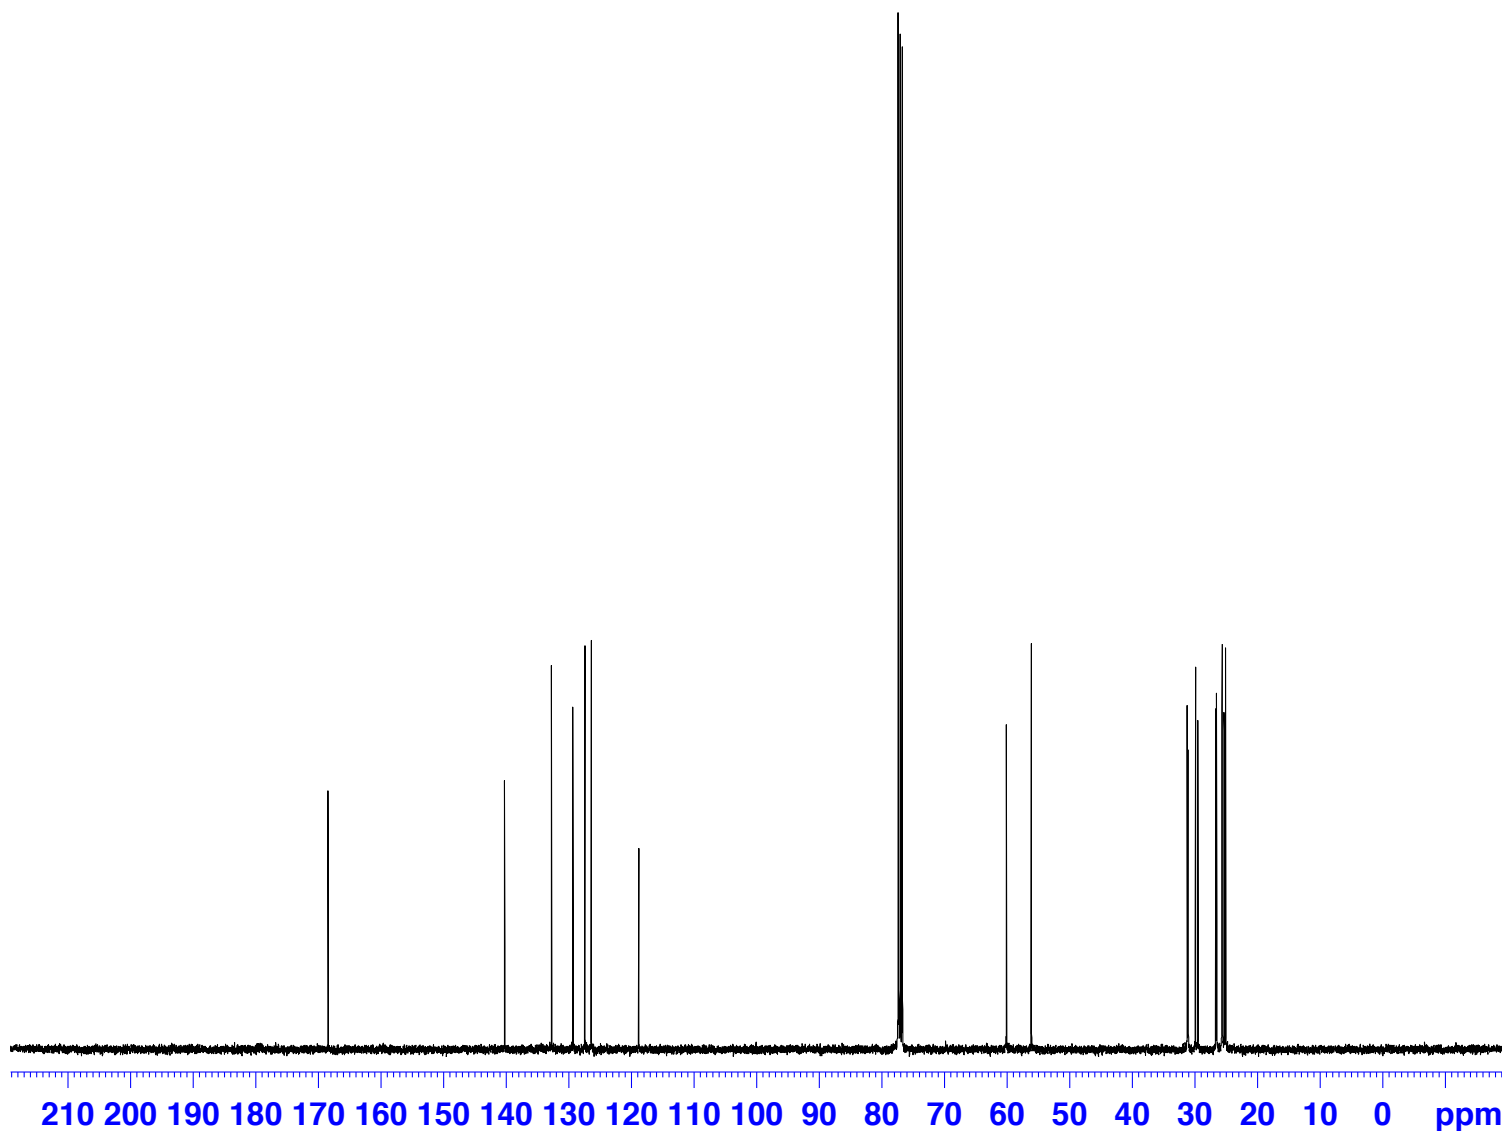

DK-12-WW-55 Final Dried NMR

user: we...  
team: research-kalyani-wertjes holder: 5  
solvent: CDCl3 expt: PROTON NS=16;SW=20;  
standard 1H experiment ()

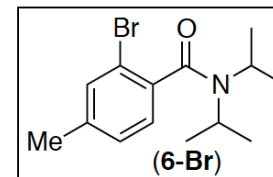

Current Data Parameters  
NAME Jun20-2013  
EXPNO 1493510  
PROCNO 1

F2 - Acquisition Parameters  
Date\_ 20130620  
Time 16.58  
INSTRUM spect  
PROBHD 5 mm BBO 1H/13  
PULPROG zg30  
TD 65536  
SOLVENT CDCl3  
NS 16  
DS 2  
SWH 8012.820 Hz  
FIDRES 0.122266 Hz  
AQ 4.0894966 sec  
RG 71.8  
DW 62.400 usec  
DE 6.00 usec  
TE 300.0 K  
D1 1.00000000 sec

===== CHANNEL f1 =====  
NUC1 1H  
P1 11.75 usec  
PL1 -4.00 dB  
SFO1 400.1324710 MHz

F2 - Processing parameters  
SI 32768  
SF 400.1300000 MHz  
WDW EM  
SSB 0  
LB 0.30 Hz  
GB 0  
PC 1.00

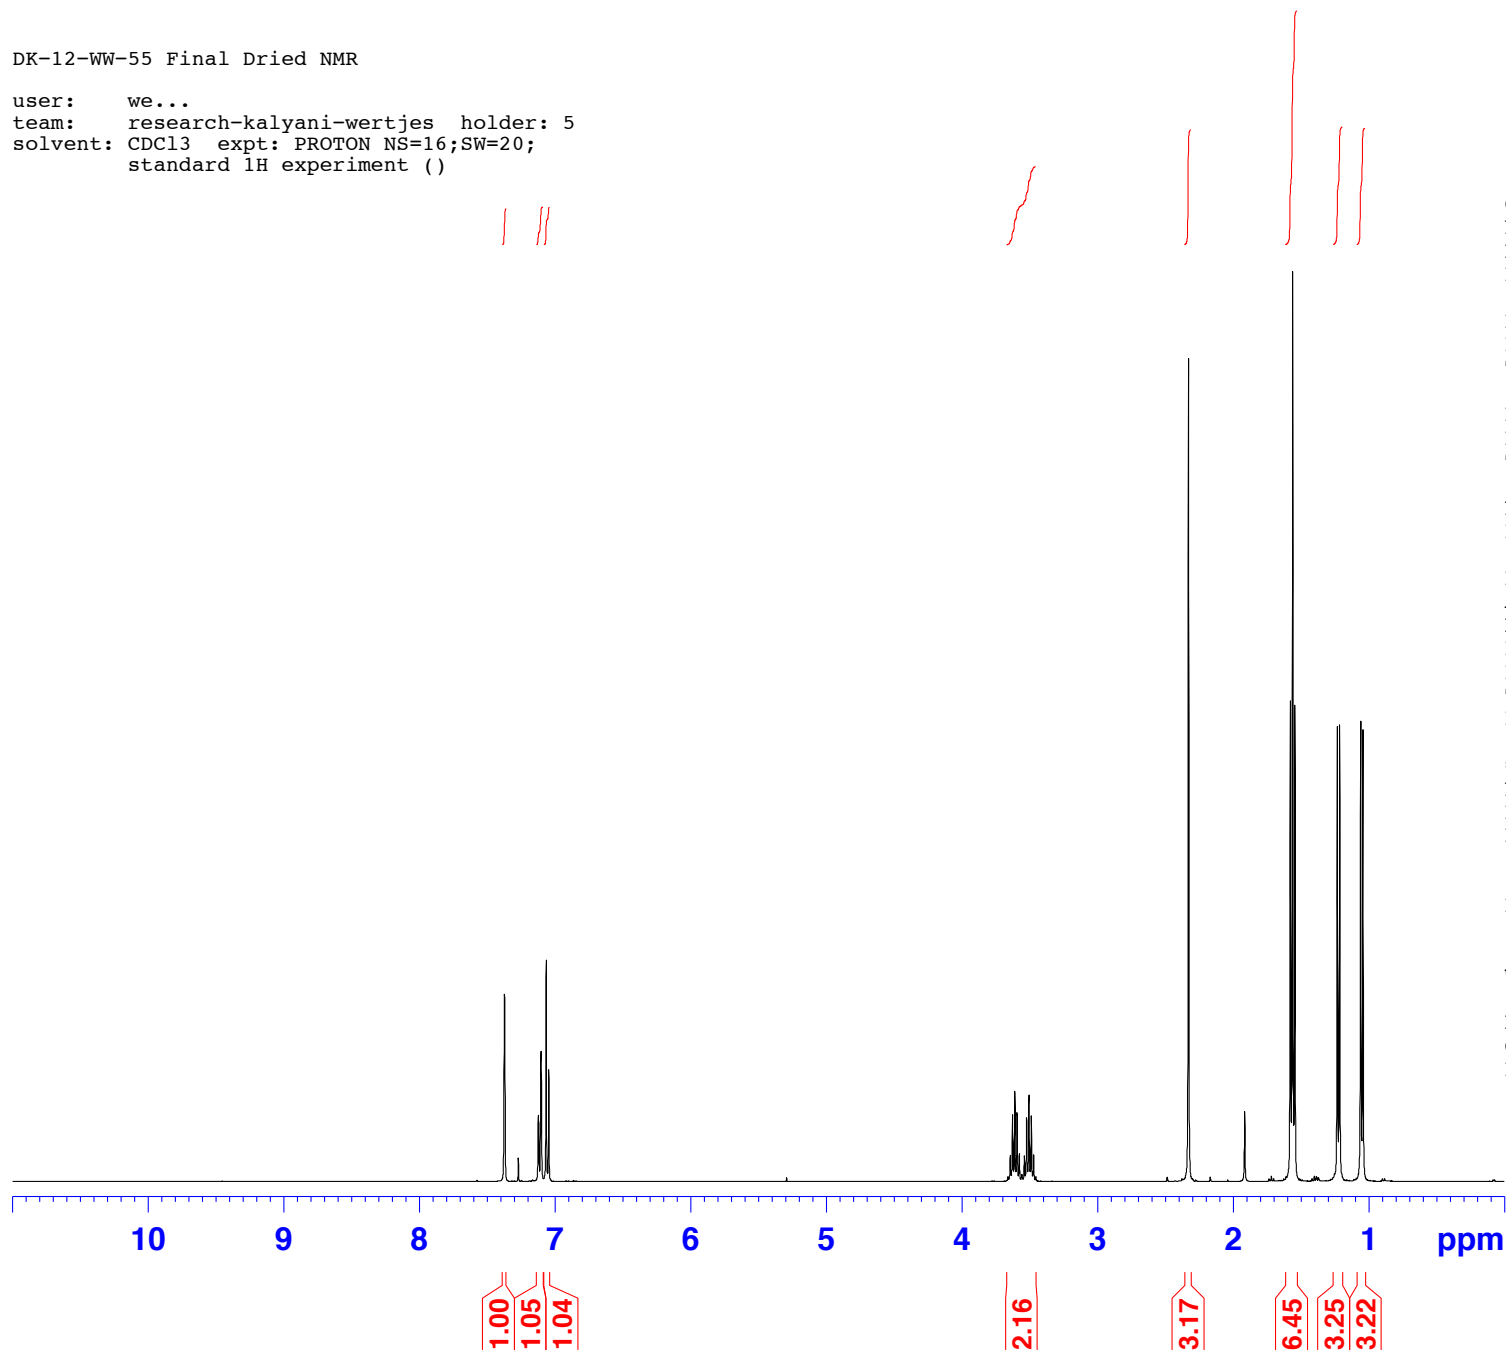



DK-12-WW-55 Final Dried NMR

user: we...  
 team: research-kalyani-wertjes holder: 5  
 solvent: CDCl3 expt: C13CPD32 NS=2048;D1=2;  
 standard C13 experiment ()

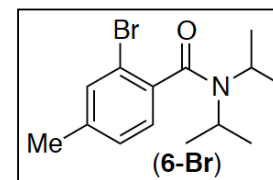

Current Data Parameters  
 NAME Jun20-2013  
 EXPNO 1493810  
 PROCNO 1

F2 - Acquisition Parameters  
 Date\_ 20130620  
 Time 19.18  
 INSTRUM spect  
 PROBHD 5 mm BBO 1H/13  
 PULPROG zgpg30  
 TD 65536  
 SOLVENT CDCl3  
 NS 2048  
 DS 2  
 SWH 23980.814 Hz  
 FIDRES 0.365918 Hz  
 AQ 1.3664756 sec  
 RG 1625.5  
 DW 20.850 usec  
 DE 6.00 usec  
 TE 300.0 K  
 D1 2.00000000 sec  
 d11 0.03000000 sec  
 d12 0.00002000 sec

===== CHANNEL f1 =====  
 NUC1 13C  
 P1 9.00 usec  
 PL1 -4.50 dB  
 SFO1 100.6228298 MHz

===== CHANNEL f2 =====  
 CPDPRG2 waltz16  
 NUC2 1H  
 PCPD2 90.00 usec  
 PL2 -4.00 dB  
 PL12 13.68 dB  
 PL13 17.24 dB  
 SFO2 400.1316005 MHz

F2 - Processing parameters  
 SI 32768  
 SF 100.6127690 MHz  
 WDW EM

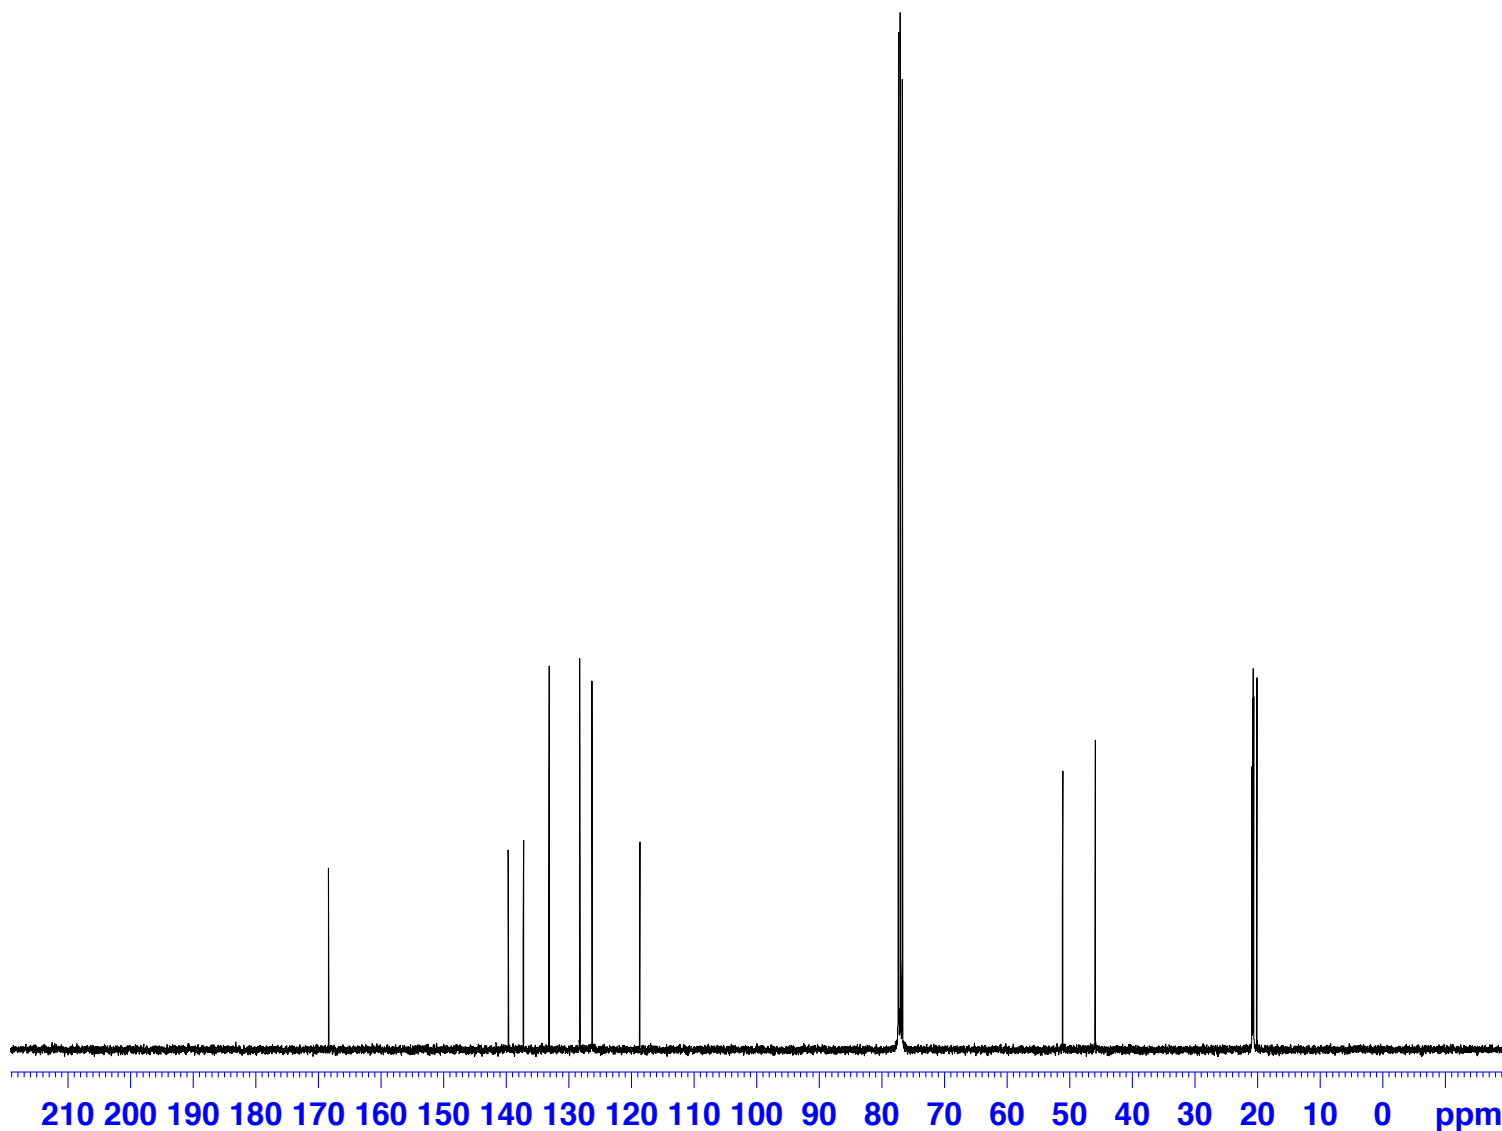

DK-XII-WW-100 Concentrated

user: we...  
team: research-kalyani holder: 7  
solvent: CDCl3 expt: PROTON NS=16;SW=20;  
standard 1H experiment ()

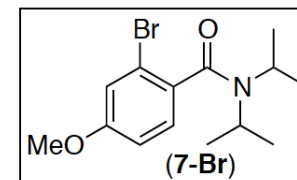

Current Data Parameters  
NAME Jul18-2013  
EXPNO 1552110  
PROCNO 1

F2 - Acquisition Parameters  
Date\_ 20130718  
Time 16.49  
INSTRUM spect  
PROBHD 5 mm BBO 1H/13  
PULPROG zg30  
TD 65536  
SOLVENT CDCl3  
NS 16  
DS 2  
SWH 8012.820 Hz  
FIDRES 0.122266 Hz  
AQ 4.0894966 sec  
RG 71.8  
DW 62.400 usec  
DE 6.00 usec  
TE 300.0 K  
D1 1.00000000 sec

===== CHANNEL f1 =====  
NUC1 1H  
P1 11.75 usec  
PL1 -4.00 dB  
SFO1 400.1324710 MHz

F2 - Processing parameters  
SI 32768  
SF 400.1300000 MHz  
WDW EM  
SSB 0  
LB 0.30 Hz  
GB 0  
PC 1.00

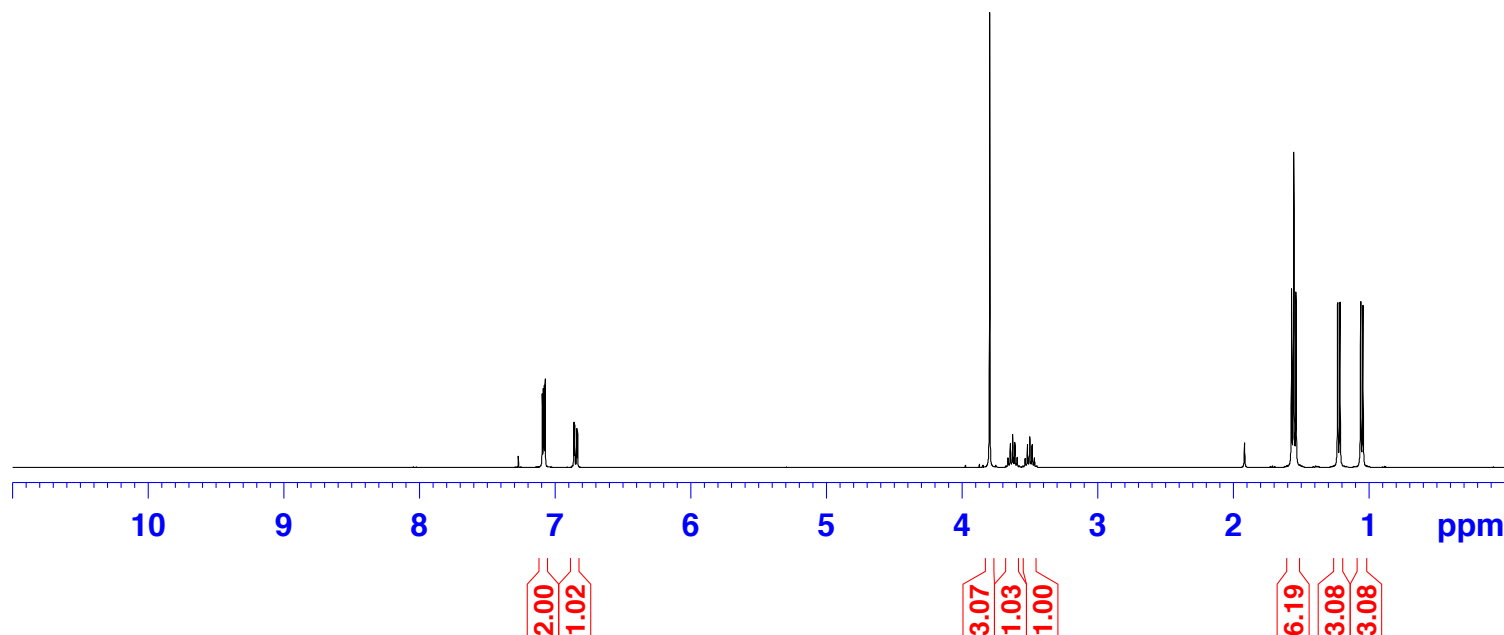

DK-XII-WW-100 Concentrated

user: we...  
team: research-kalyani holder: 7  
solvent: CDCl3 expt: C13CPD32 NS=2048;D1=2;  
standard C13 experiment ()

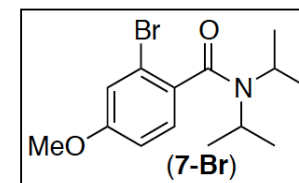

Current Data Parameters  
NAME Jul18-2013  
EXPNO 1552210  
PROCNO 1

F2 - Acquisition Parameters  
Date\_ 20130718  
Time 18.45  
INSTRUM spect  
PROBHD 5 mm BBO 1H/13  
PULPROG zgpg30  
TD 65536  
SOLVENT CDCl3  
NS 2048  
DS 2  
SWH 23980.814 Hz  
FIDRES 0.365918 Hz  
AQ 1.3664756 sec  
RG 1625.5  
DW 20.850 usec  
DE 6.00 usec  
TE 300.0 K  
D1 2.00000000 sec  
d11 0.03000000 sec  
d12 0.00002000 sec

===== CHANNEL f1 =====  
NUC1 13C  
P1 9.00 usec  
PL1 -4.50 dB  
SFO1 100.6228298 MHz

===== CHANNEL f2 =====  
CPDPRG2 waltz16  
NUC2 1H  
PCPD2 90.00 usec  
PL2 -4.00 dB  
PL12 13.68 dB  
PL13 17.24 dB  
SFO2 400.1316005 MHz

F2 - Processing parameters  
SI 32768  
SF 100.6127690 MHz  
WDW EM

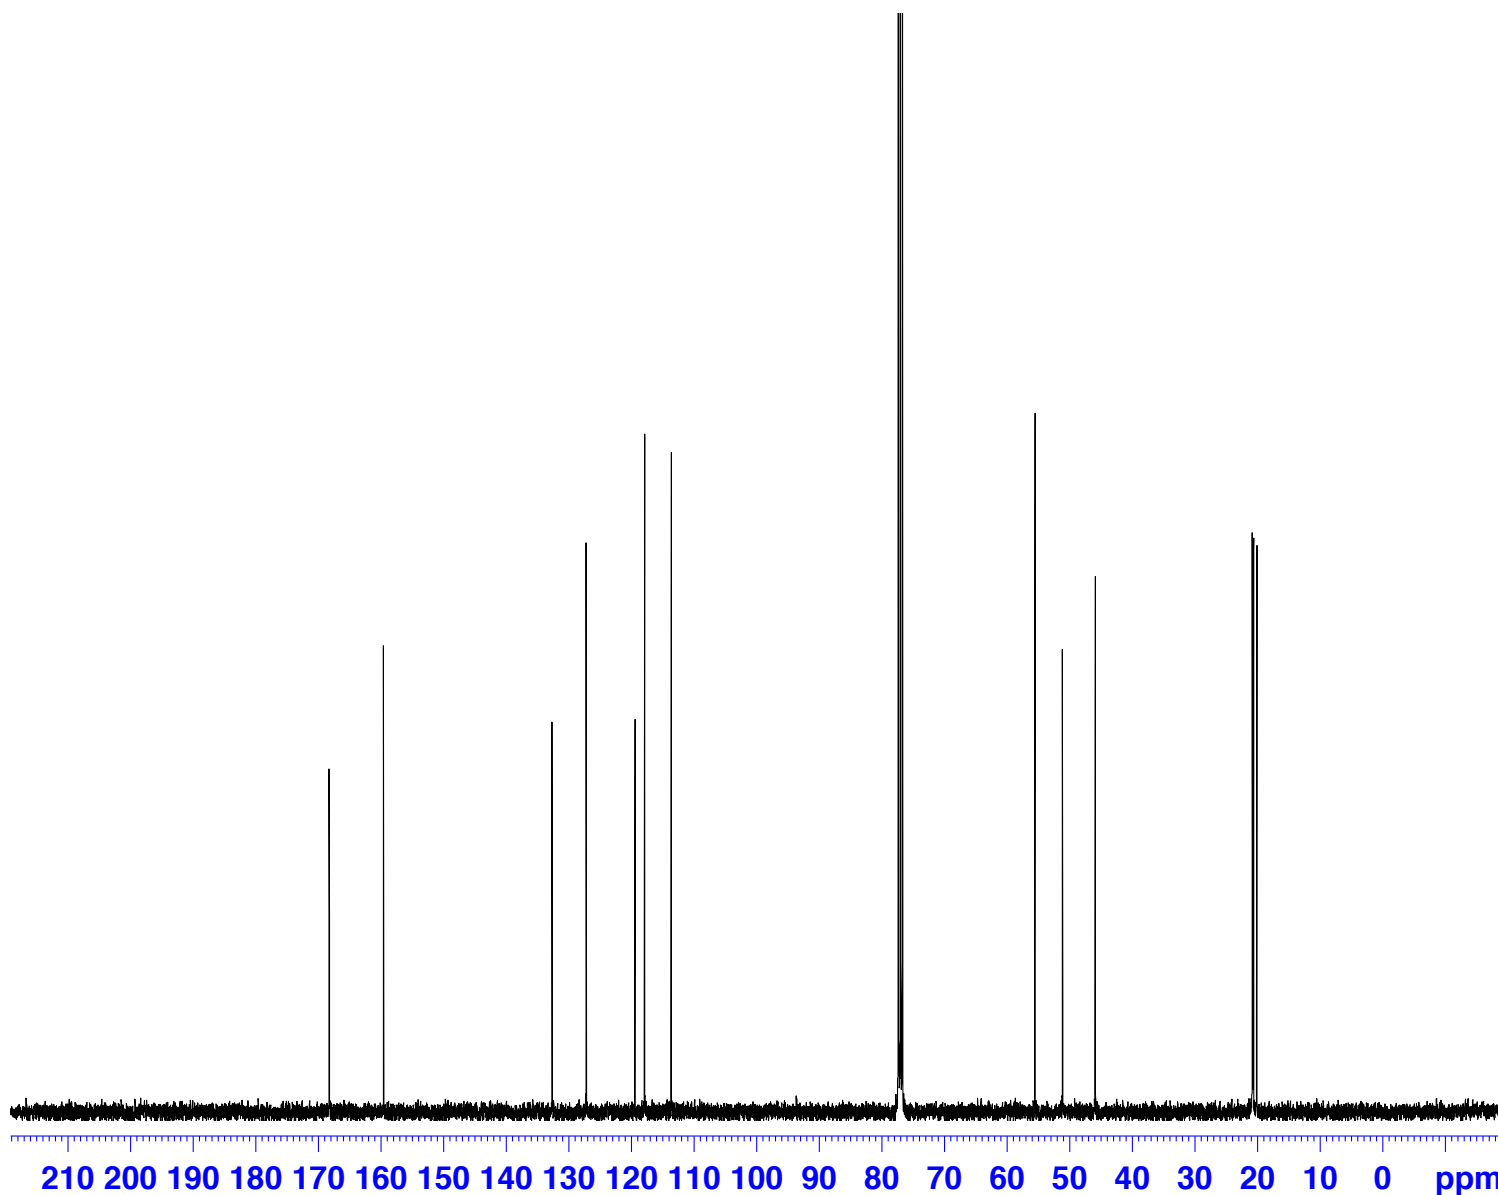

DK-XII-WW-91 Concentrated

user: we...  
team: research-kalyani holder: 15  
solvent: CDCl3 expt: PROTON NS=16;SW=20;  
standard 1H experiment ()

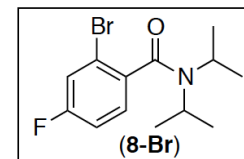

Current Data Parameters  
NAME Jul17-2013  
EXPNO 1550110  
PROCNO 1

F2 - Acquisition Parameters  
Date\_ 20130717  
Time 17.36  
INSTRUM spect  
PROBHD 5 mm BBO 1H/13  
PULPROG zg30  
TD 65536  
SOLVENT CDCl3  
NS 16  
DS 2  
SWH 8012.820 Hz  
FIDRES 0.122266 Hz  
AQ 4.0894966 sec  
RG 90.5  
DW 62.400 usec  
DE 6.00 usec  
TE 300.0 K  
D1 1.00000000 sec

===== CHANNEL f1 =====  
NUC1 1H  
P1 11.75 usec  
PL1 -4.00 dB  
SFO1 400.1324710 MHz

F2 - Processing parameters  
SI 32768  
SF 400.1300000 MHz  
WDW EM  
SSB 0  
LB 0.30 Hz  
GB 0  
PC 1.00

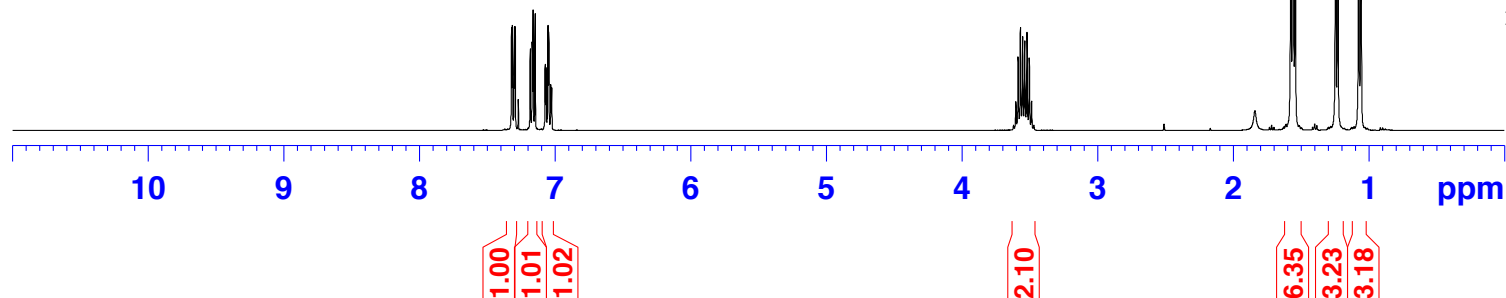

DK-XII-WW-91 Concentrated

user: we...  
team: research-kalyani holder: 15  
solvent: CDCl3 expt: C13CPD32 NS=2048;D1=2;  
standard C13 experiment ()

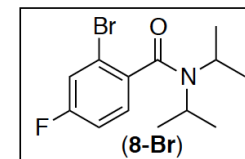

Current Data Parameters  
NAME Jul17-2013  
EXPNO 1550210  
PROCNO 1

F2 - Acquisition Parameters  
Date\_ 20130717  
Time 19.41  
INSTRUM spect  
PROBHD 5 mm BBO 1H/13  
PULPROG zgpg30  
TD 65536  
SOLVENT CDCl3  
NS 2048  
DS 2  
SWH 23980.814 Hz  
FIDRES 0.365918 Hz  
AQ 1.3664756 sec  
RG 1149.4  
DW 20.850 usec  
DE 6.00 usec  
TE 300.0 K  
D1 2.00000000 sec  
d11 0.03000000 sec  
d12 0.00002000 sec

===== CHANNEL f1 =====  
NUC1 13C  
P1 9.00 usec  
PL1 -4.50 dB  
SFO1 100.6228298 MHz

===== CHANNEL f2 =====  
CPDPRG2 waltz16  
NUC2 1H  
PCPD2 90.00 usec  
PL2 -4.00 dB  
PL12 13.68 dB  
PL13 17.24 dB  
SFO2 400.1316005 MHz

F2 - Processing parameters  
SI 32768  
SF 100.6127690 MHz  
WDW EM

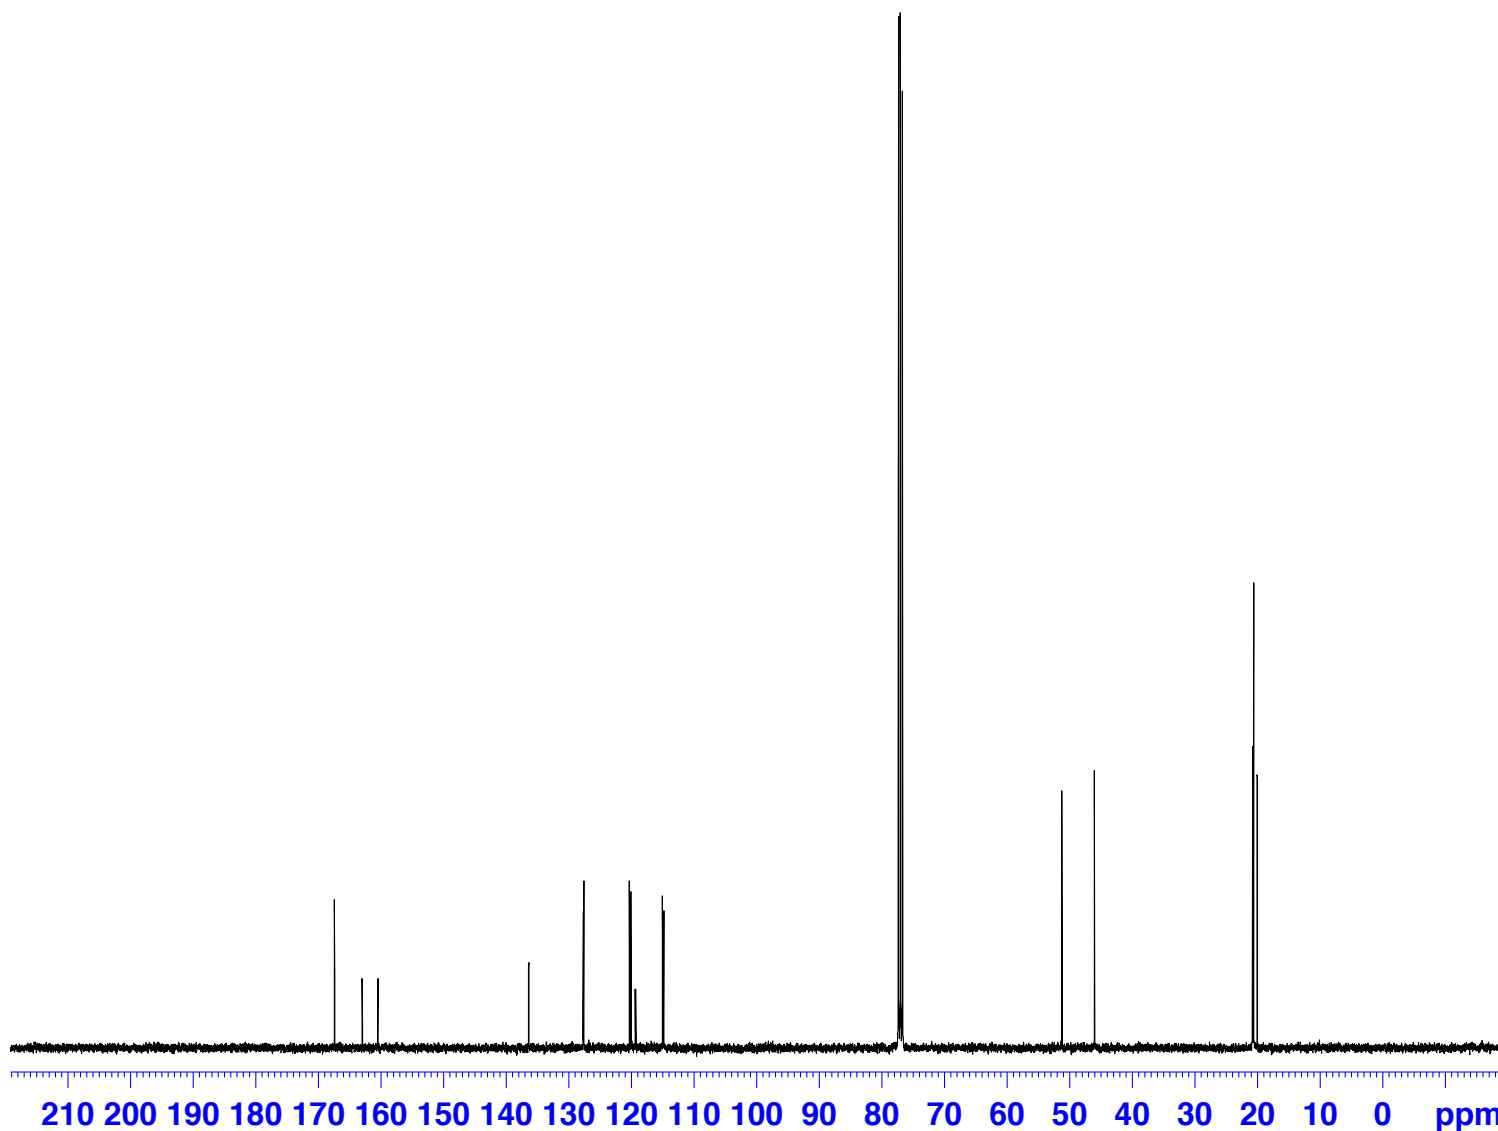

DK-12-WW-60 Final Dried NMR

user: we...  
team: research-kalyani-wertjes holder: 6  
solvent: CDCl3 expt: PROTON NS=16;SW=20;  
standard 1H experiment ()

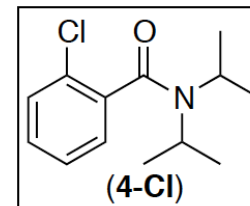

Current Data Parameters  
NAME Jun20-2013  
EXPNO 1493610  
PROCNO 1

F2 - Acquisition Parameters  
Date\_ 20130620  
Time 17.17  
INSTRUM spect  
PROBHD 5 mm BBO 1H/13  
PULPROG zg30  
TD 65536  
SOLVENT CDCl3  
NS 16  
DS 2  
SWH 8012.820 Hz  
FIDRES 0.122266 Hz  
AQ 4.0894966 sec  
RG 90.5  
DW 62.400 usec  
DE 6.00 usec  
TE 300.0 K  
D1 1.00000000 sec

===== CHANNEL f1 =====  
NUC1 1H  
P1 11.75 usec  
PL1 -4.00 dB  
SFO1 400.1324710 MHz

F2 - Processing parameters  
SI 32768  
SF 400.1300000 MHz  
WDW EM  
SSB 0  
LB 0.30 Hz  
GB 0  
PC 1.00

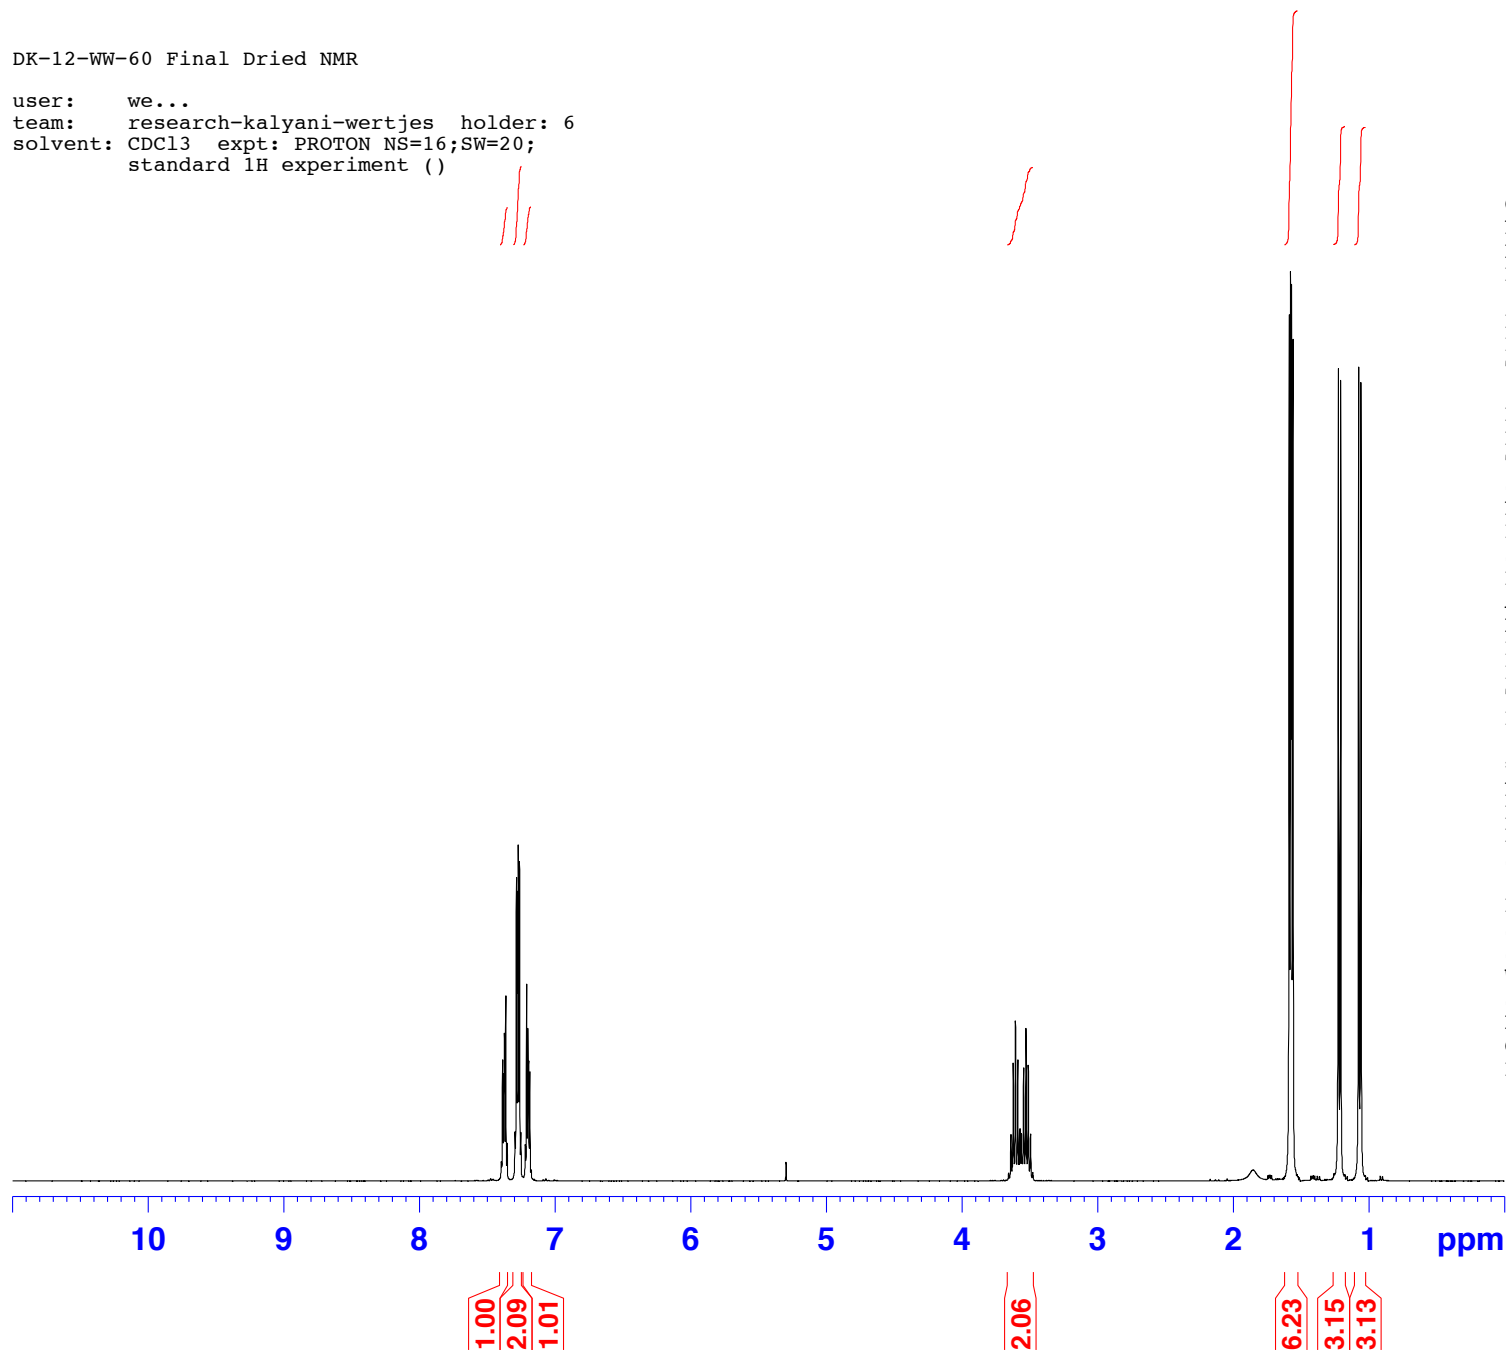

DK-12-WW-60 Final Dried NMR

user: we...  
 team: research-kalyani-wertjes holder: 6  
 solvent: CDCl3 expt: C13CPD32 NS=2048;D1=2;  
 standard C13 experiment ()

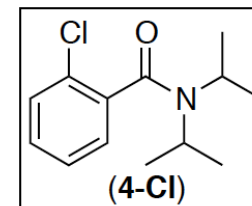

Current Data Parameters  
 NAME Jun20-2013  
 EXPNO 1493910  
 PROCNO 1

F2 - Acquisition Parameters  
 Date\_ 20130620  
 Time 21.17  
 INSTRUM spect  
 PROBHD 5 mm BBO 1H/13  
 PULPROG zgpg30  
 TD 65536  
 SOLVENT CDCl3  
 NS 2048  
 DS 2  
 SWH 23980.814 Hz  
 FIDRES 0.365918 Hz  
 AQ 1.3664756 sec  
 RG 1448.2  
 DW 20.850 usec  
 DE 6.00 usec  
 TE 300.0 K  
 D1 2.00000000 sec  
 d11 0.03000000 sec  
 d12 0.00002000 sec

===== CHANNEL f1 =====  
 NUC1 13C  
 P1 9.00 usec  
 PL1 -4.50 dB  
 SFO1 100.6228298 MHz

===== CHANNEL f2 =====  
 CPDPRG2 waltz16  
 NUC2 1H  
 PCPD2 90.00 usec  
 PL2 -4.00 dB  
 PL12 13.68 dB  
 PL13 17.24 dB  
 SFO2 400.1316005 MHz

F2 - Processing parameters  
 SI 32768  
 SF 100.6127690 MHz  
 WDW EM

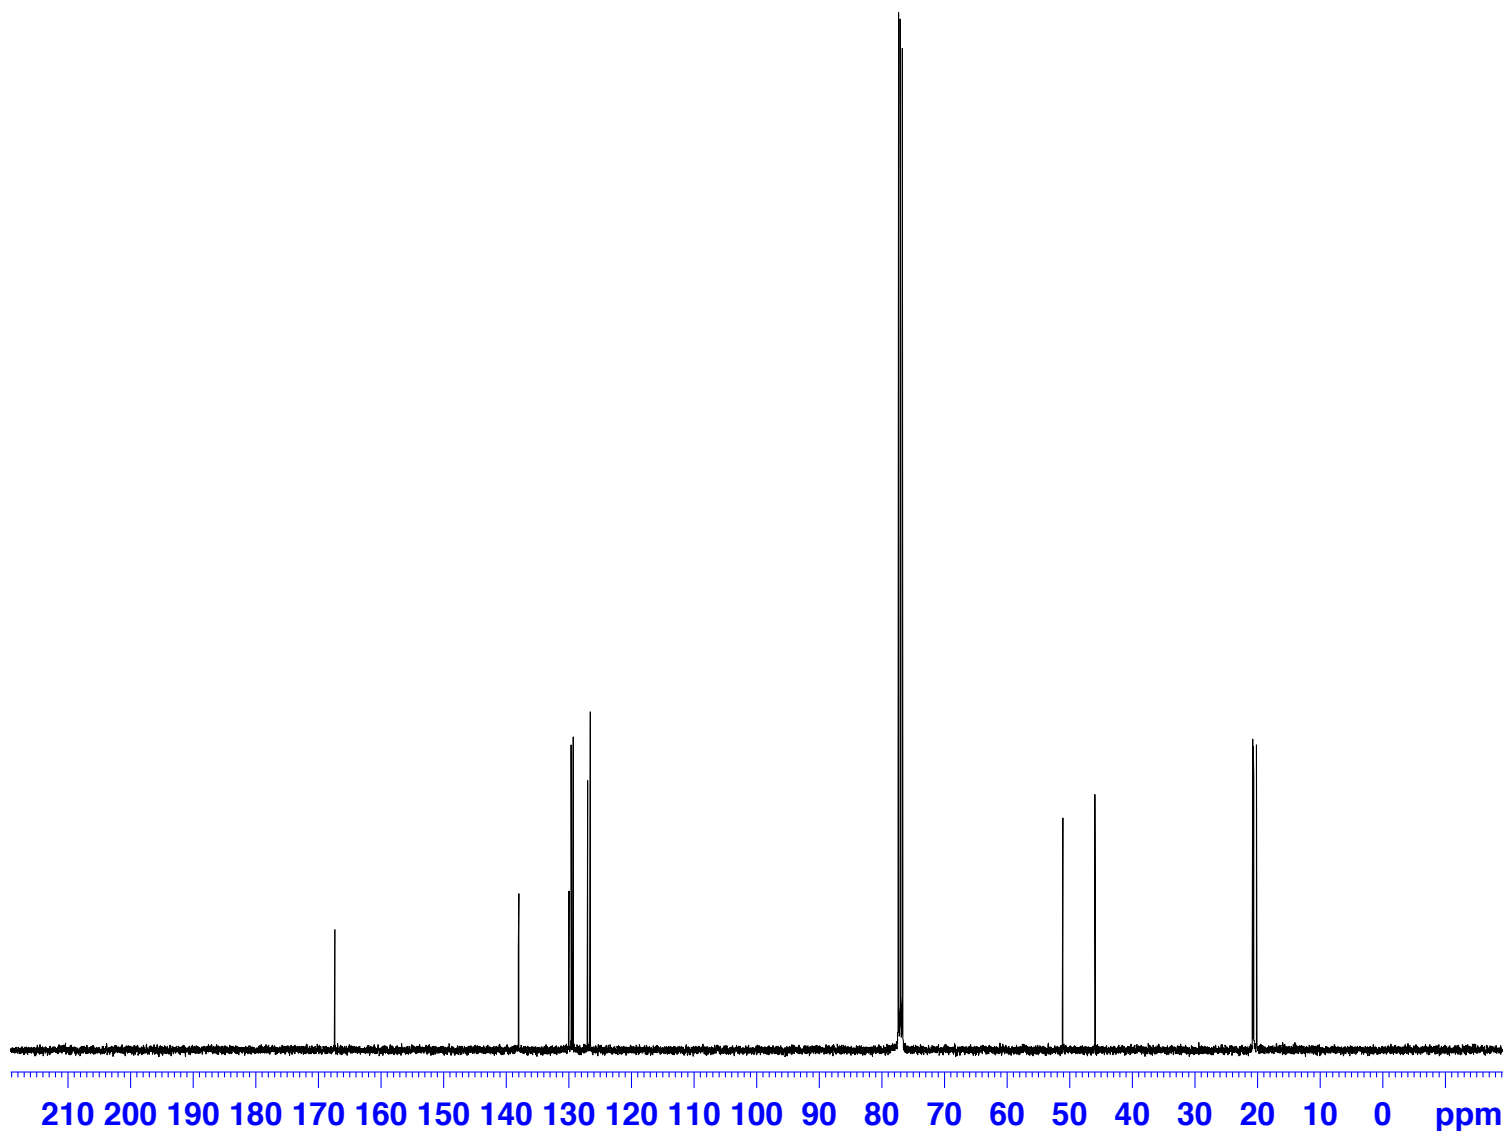

DK-XII-WW-90 CDCl3

user: we...  
team: research-kalyani holder: 2  
solvent: CDCl3 expt: PROTON NS=16;SW=20;  
standard 1H experiment ()

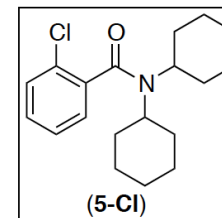

Current Data Parameters  
NAME Jul23-2013  
EXPNO 1561110  
PROCNO 1

F2 - Acquisition Parameters  
Date\_ 20130723  
Time 11.47  
INSTRUM spect  
PROBHD 5 mm BBO 1H/13  
PULPROG zg30  
TD 65536  
SOLVENT CDCl3  
NS 16  
DS 2  
SWH 8012.820 Hz  
FIDRES 0.122266 Hz  
AQ 4.0894966 sec  
RG 322.5  
DW 62.400 usec  
DE 6.00 usec  
TE 300.0 K  
D1 1.00000000 sec

===== CHANNEL f1 =====  
NUC1 1H  
P1 11.75 usec  
PL1 -4.00 dB  
SFO1 400.1324710 MHz

F2 - Processing parameters  
SI 32768  
SF 400.1300000 MHz  
WDW EM  
SSB 0  
LB 0.30 Hz  
GB 0  
PC 1.00

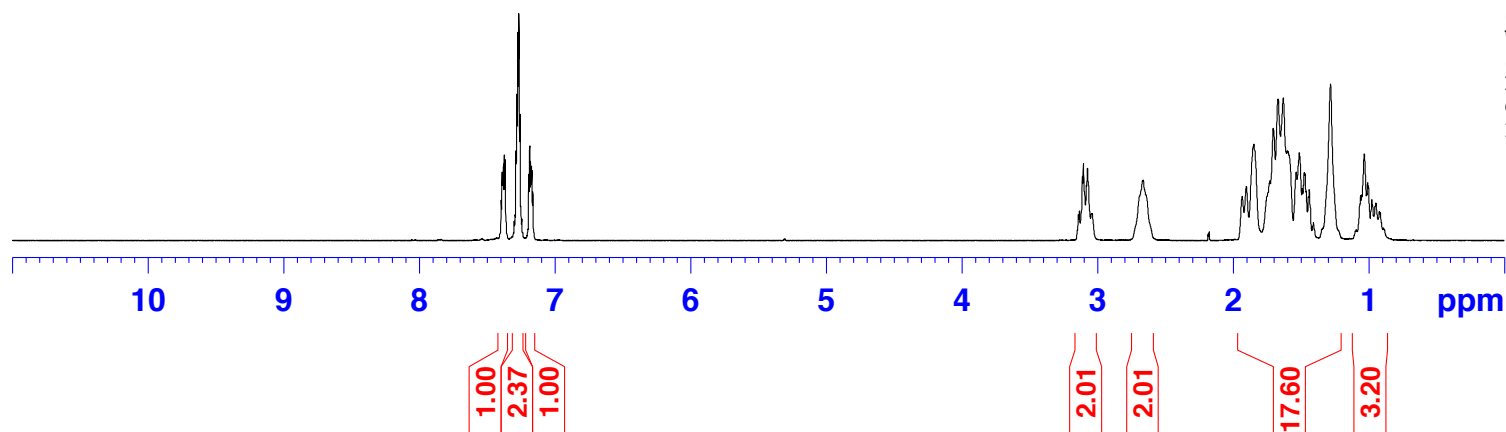



DK-XII-WW-90 Concentrated

user: we...  
team: research-kalyani holder: 9  
solvent: CDCl3 expt: C13CPD32 NS=4096;D1=2;  
standard C13 experiment ()

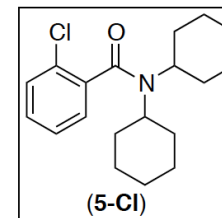

Current Data Parameters  
NAME Jul05-2013  
EXPNO 1529410  
PROCNO 1

F2 - Acquisition Parameters  
Date\_ 20130706  
Time 4.49  
INSTRUM spect  
PROBHD 5 mm BBO 1H/13  
PULPROG zgpg30  
TD 65536  
SOLVENT CDCl3  
NS 4096  
DS 2  
SWH 23980.814 Hz  
FIDRES 0.365918 Hz  
AQ 1.3664756 sec  
RG 7298.2  
DW 20.850 usec  
DE 6.00 usec  
TE 300.0 K  
D1 2.00000000 sec  
d11 0.03000000 sec  
d12 0.00002000 sec

===== CHANNEL f1 =====  
NUC1 13C  
P1 9.00 usec  
PL1 -4.50 dB  
SFO1 100.6228298 MHz

===== CHANNEL f2 =====  
CPDPRG2 waltz16  
NUC2 1H  
PCPD2 90.00 usec  
PL2 -4.00 dB  
PL12 13.68 dB  
PL13 17.24 dB  
SFO2 400.1316005 MHz

F2 - Processing parameters  
SI 32768  
SF 100.6127690 MHz  
WDW EM

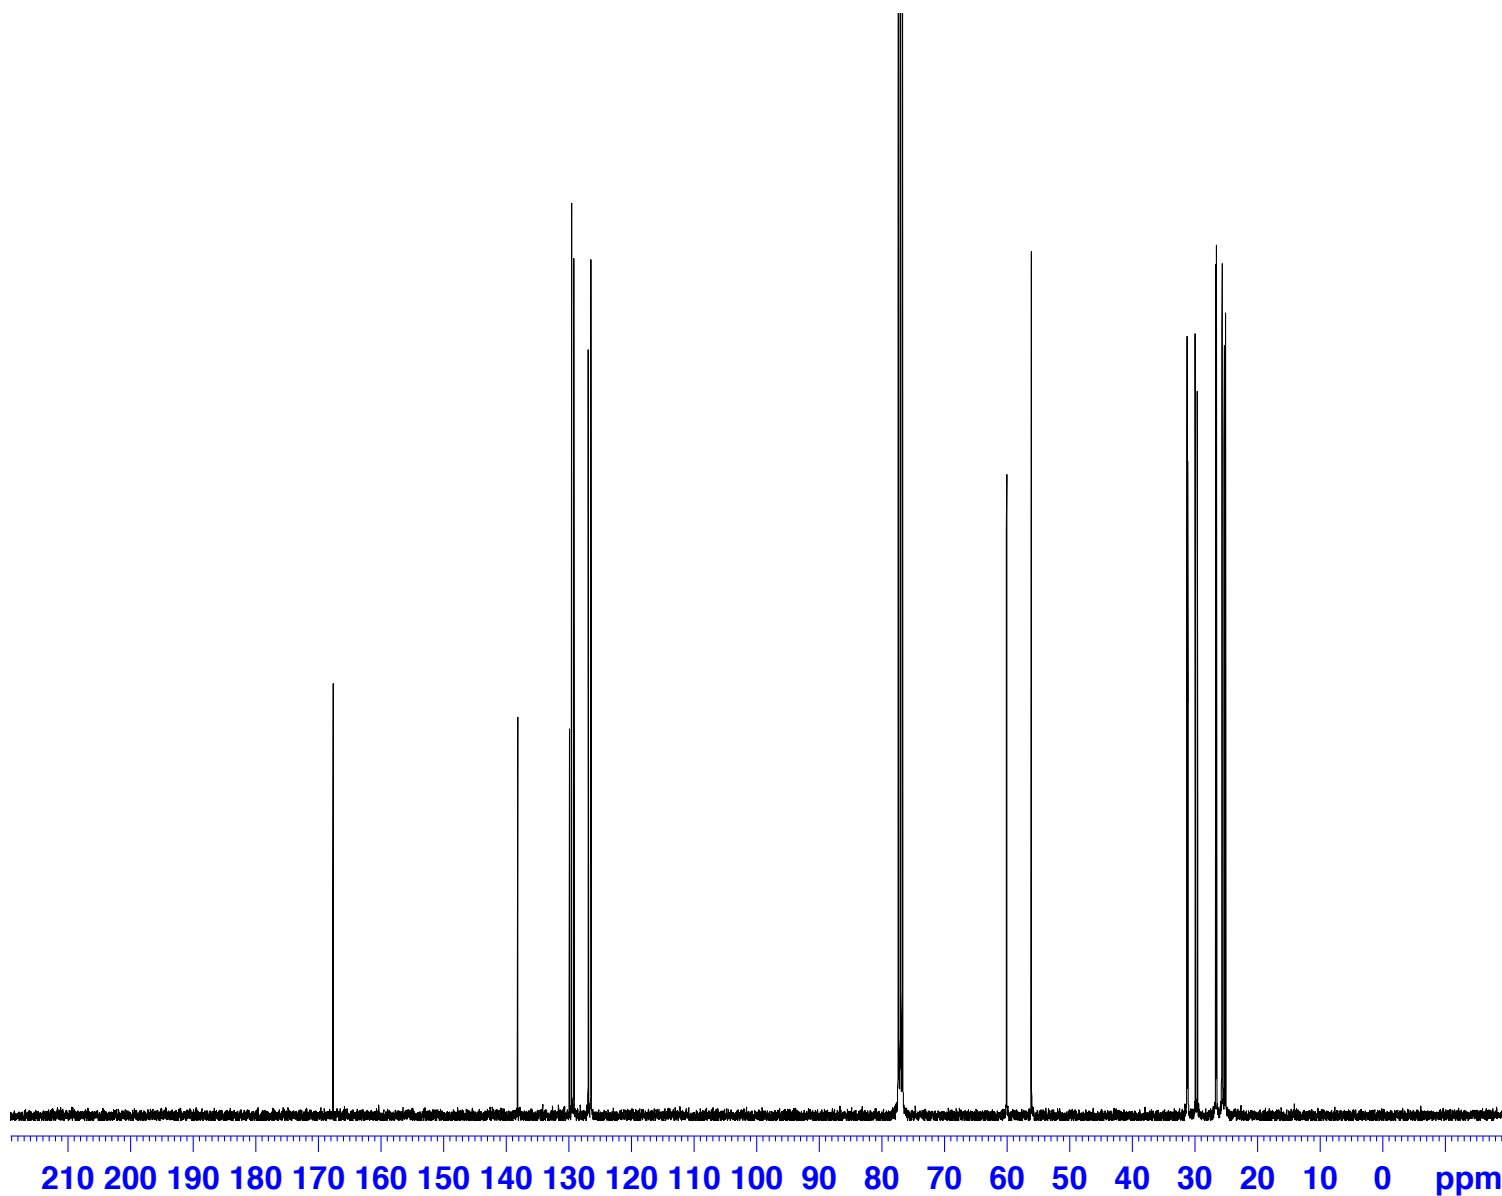

DK-XII-WW-54 Concentrated

user: we...  
team: research-kalyani holder: 6  
solvent: CDCl3 expt: PROTON NS=16;SW=20;  
standard 1H experiment ()

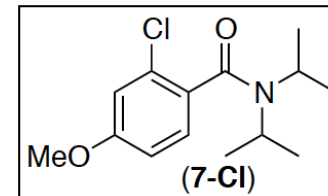

Current Data Parameters  
NAME Jun29-2013  
EXPNO 1516610  
PROCNO 1

F2 - Acquisition Parameters  
Date\_ 20130629  
Time 18.15  
INSTRUM spect  
PROBHD 5 mm BBO 1H/13  
PULPROG zg30  
TD 65536  
SOLVENT CDCl3  
NS 16  
DS 2  
SWH 8012.820 Hz  
FIDRES 0.122266 Hz  
AQ 4.0894966 sec  
RG 64  
DW 62.400 usec  
DE 6.00 usec  
TE 300.0 K  
D1 1.00000000 sec

===== CHANNEL f1 =====  
NUC1 1H  
P1 11.75 usec  
PL1 -4.00 dB  
SFO1 400.1324710 MHz

F2 - Processing parameters  
SI 32768  
SF 400.1300000 MHz  
WDW EM  
SSB 0  
LB 0.30 Hz  
GB 0  
PC 1.00

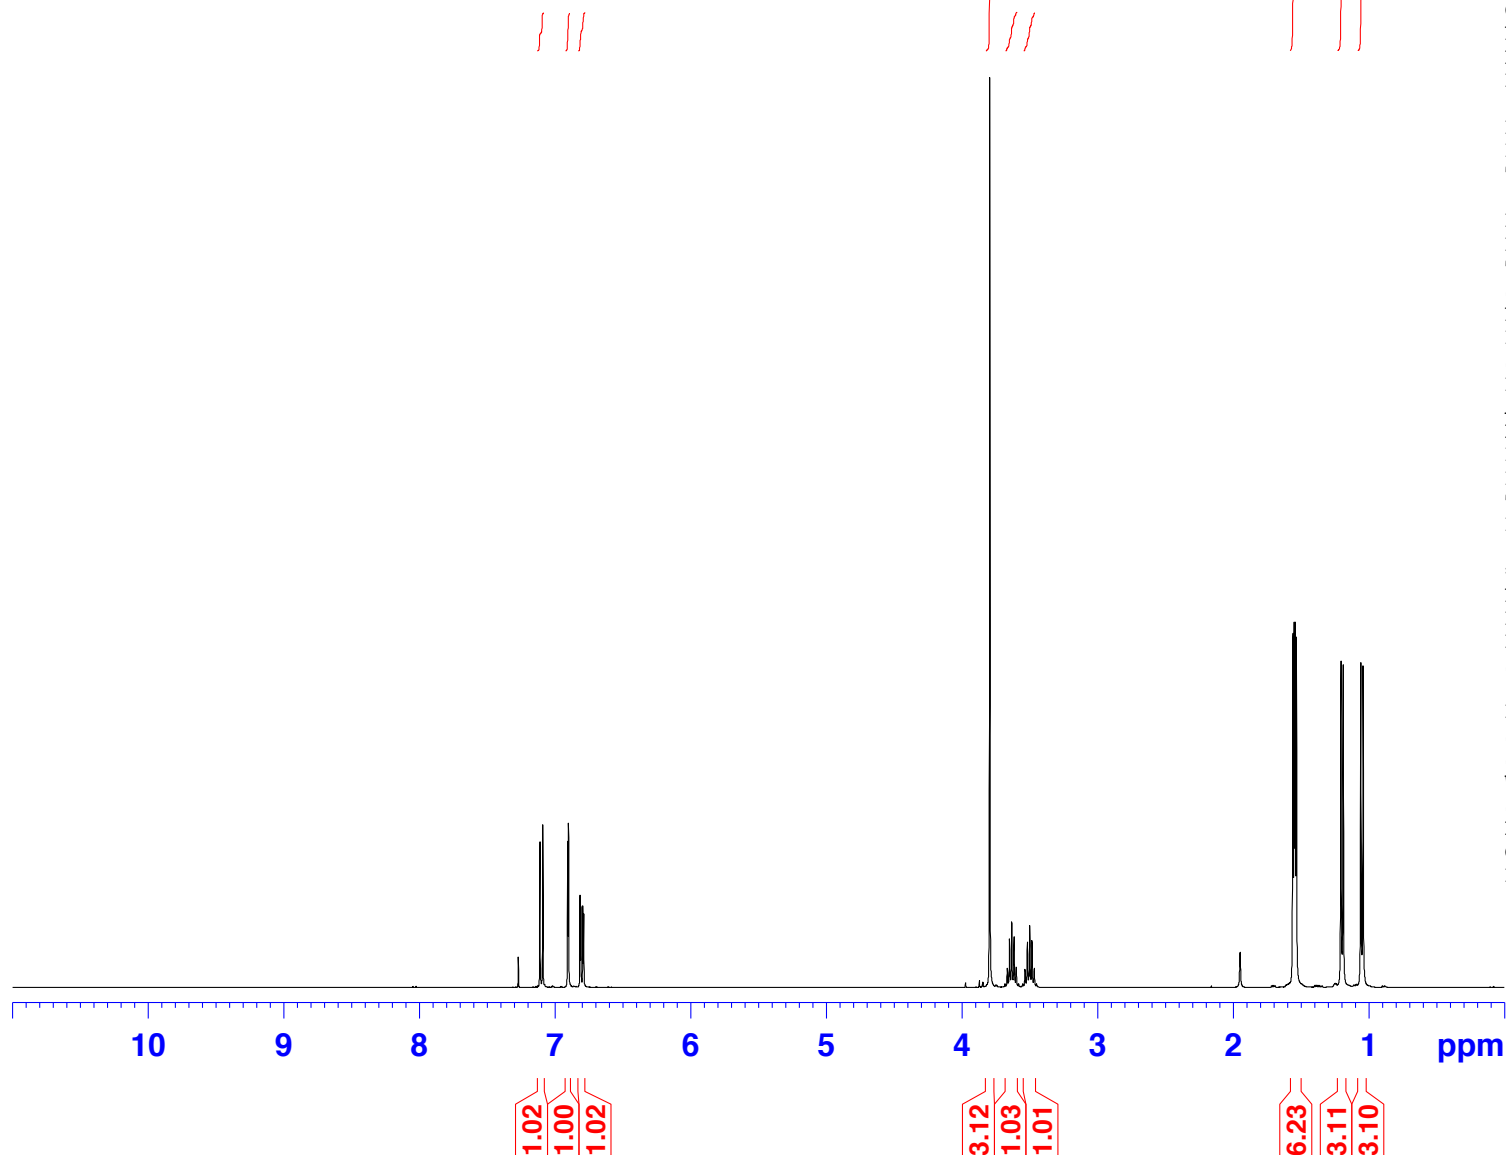

DK-XII-WW-54 Concentrated

user: we...  
team: research-kalyani holder: 6  
solvent: CDCl3 expt: C13CPD32 NS=2048;D1=2;  
standard C13 experiment ()

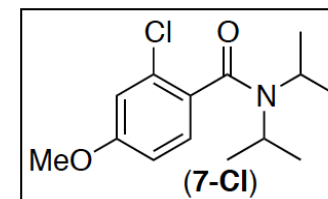

Current Data Parameters  
NAME Jun29-2013  
EXPNO 1516710  
PROCNO 1

F2 - Acquisition Parameters  
Date\_ 20130629  
Time 22.13  
INSTRUM spect  
PROBHD 5 mm BBO 1H/13  
PULPROG zgpg30  
TD 65536  
SOLVENT CDCl3  
NS 2048  
DS 2  
SWH 23980.814 Hz  
FIDRES 0.365918 Hz  
AQ 1.3664756 sec  
RG 3251  
DW 20.850 usec  
DE 6.00 usec  
TE 300.0 K  
D1 2.00000000 sec  
d11 0.03000000 sec  
d12 0.00002000 sec

===== CHANNEL f1 =====  
NUC1 13C  
P1 9.00 usec  
PL1 -4.50 dB  
SFO1 100.6228298 MHz

===== CHANNEL f2 =====  
CPDPRG2 waltz16  
NUC2 1H  
PCPD2 90.00 usec  
PL2 -4.00 dB  
PL12 13.68 dB  
PL13 17.24 dB  
SFO2 400.1316005 MHz

F2 - Processing parameters  
SI 32768  
SF 100.6127690 MHz  
WDW EM

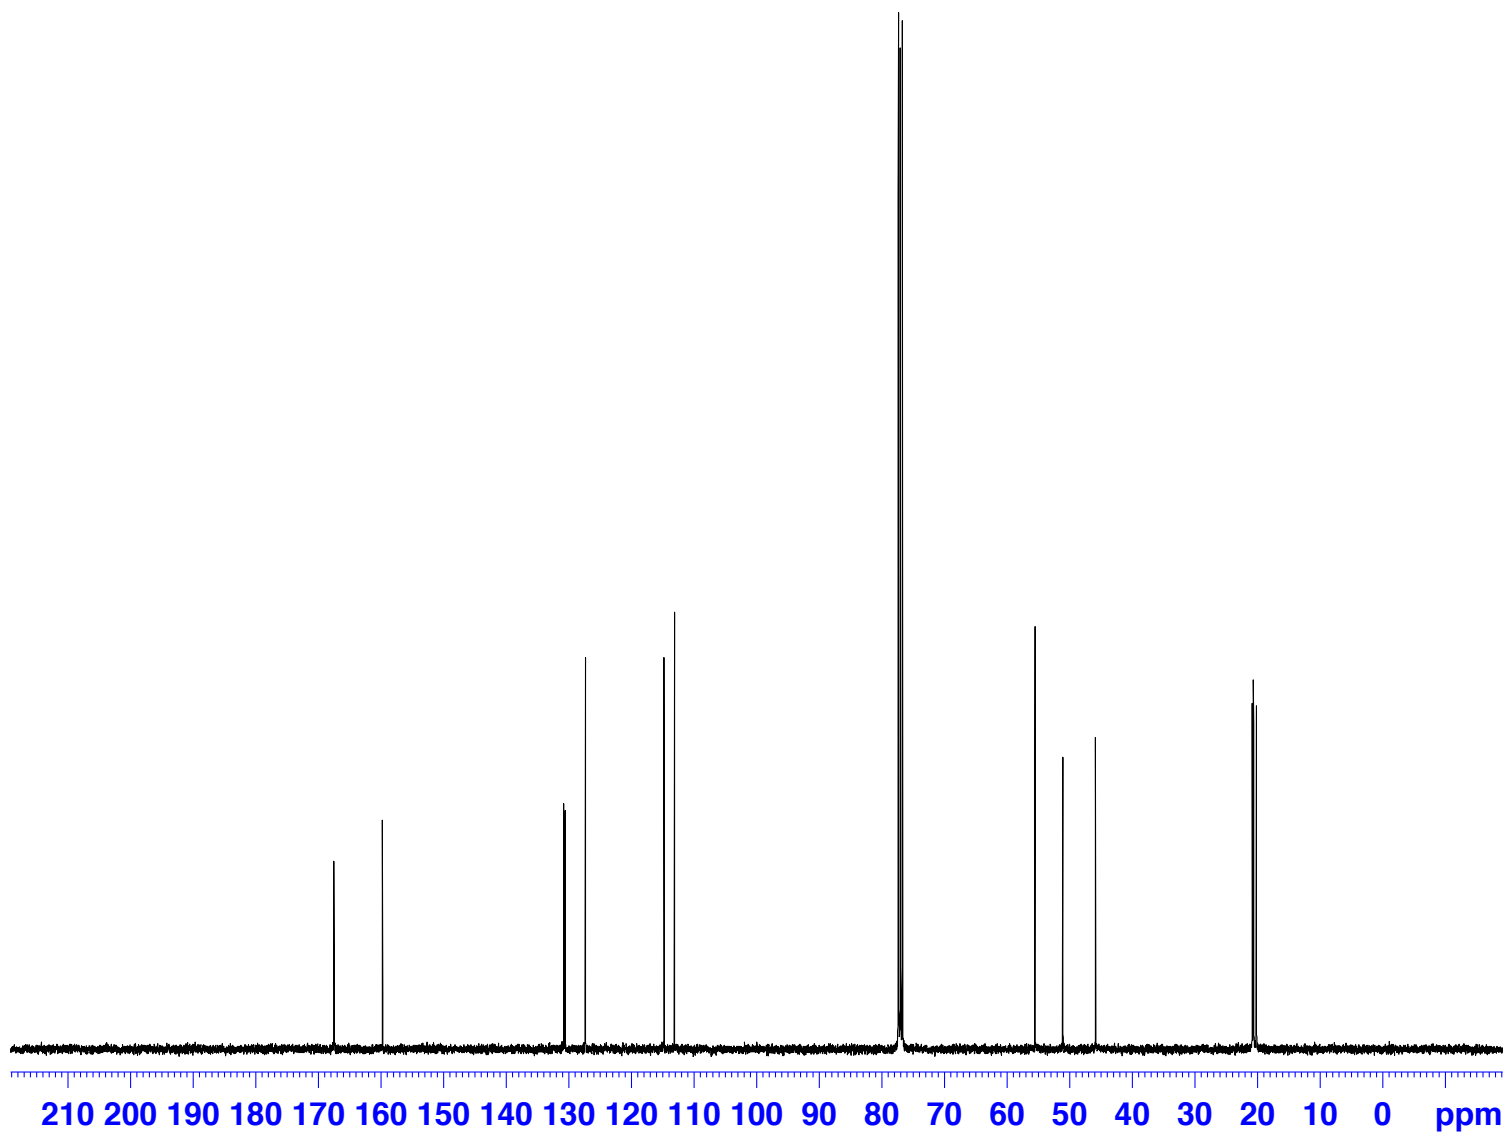

DK-12-WW-66 Concentrated

user: we...  
team: research-kalyani-wertjes holder: 4  
solvent: CDCl3 expt: PROTON NS=16;SW=20;  
standard 1H experiment ()

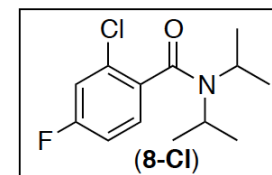

Current Data Parameters  
NAME Jun23-2013  
EXPNO 1496710  
PROCNO 1

F2 - Acquisition Parameters  
Date\_ 20130623  
Time 12.23  
INSTRUM spect  
PROBHD 5 mm BBO 1H/13  
PULPROG zg30  
TD 65536  
SOLVENT CDCl3  
NS 16  
DS 2  
SWH 8012.820 Hz  
FIDRES 0.122266 Hz  
AQ 4.0894966 sec  
RG 71.8  
DW 62.400 usec  
DE 6.00 usec  
TE 300.0 K  
D1 1.00000000 sec

===== CHANNEL f1 =====  
NUC1 1H  
P1 11.75 usec  
PL1 -4.00 dB  
SFO1 400.1324710 MHz

F2 - Processing parameters  
SI 32768  
SF 400.1300000 MHz  
WDW EM  
SSB 0  
LB 0.30 Hz  
GB 0  
PC 1.00

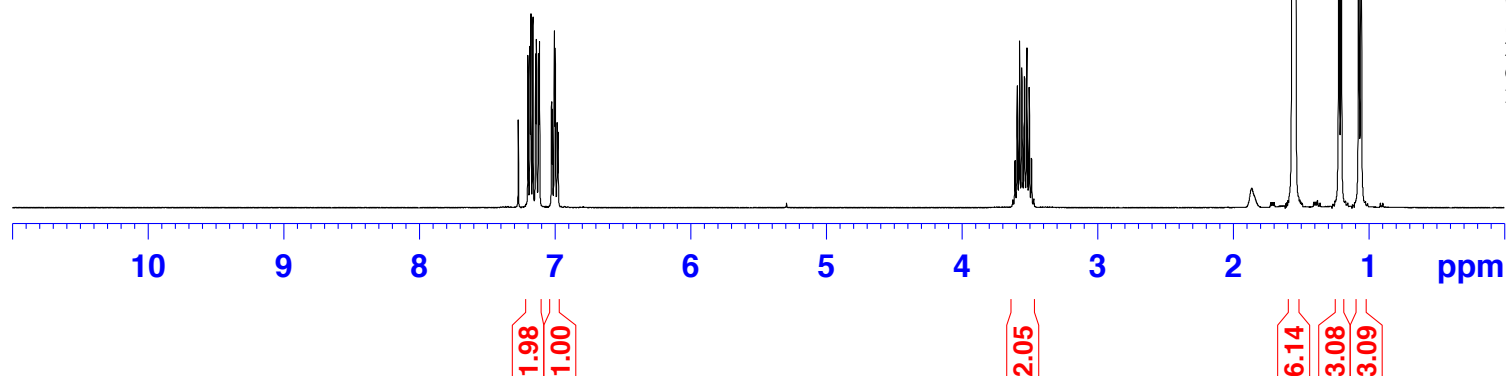

DK-12-WW-66 Concentrated

user: we...  
team: research-kalyani-wertjes holder: 4  
solvent: CDCl3 expt: C13CPD32 NS=2048;D1=2;  
standard C13 experiment ()

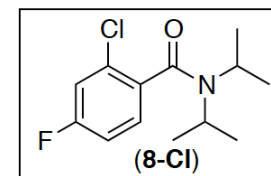

Current Data Parameters  
NAME Jun23-2013  
EXPNO 1496810  
PROCNO 1

F2 - Acquisition Parameters  
Date\_ 20130623  
Time 14.19  
INSTRUM spect  
PROBHD 5 mm BBO 1H/13  
PULPROG zgpg30  
TD 65536  
SOLVENT CDCl3  
NS 2048  
DS 2  
SWH 23980.814 Hz  
FIDRES 0.365918 Hz  
AQ 1.3664756 sec  
RG 1448.2  
DW 20.850 usec  
DE 6.00 usec  
TE 300.0 K  
D1 2.00000000 sec  
d11 0.03000000 sec  
d12 0.00002000 sec

===== CHANNEL f1 =====  
NUC1 13C  
P1 9.00 usec  
PL1 -4.50 dB  
SFO1 100.6228298 MHz

===== CHANNEL f2 =====  
CPDPRG2 waltz16  
NUC2 1H  
PCPD2 90.00 usec  
PL2 -4.00 dB  
PL12 13.68 dB  
PL13 17.24 dB  
SFO2 400.1316005 MHz

F2 - Processing parameters  
SI 32768  
SF 100.6127690 MHz  
WDW EM

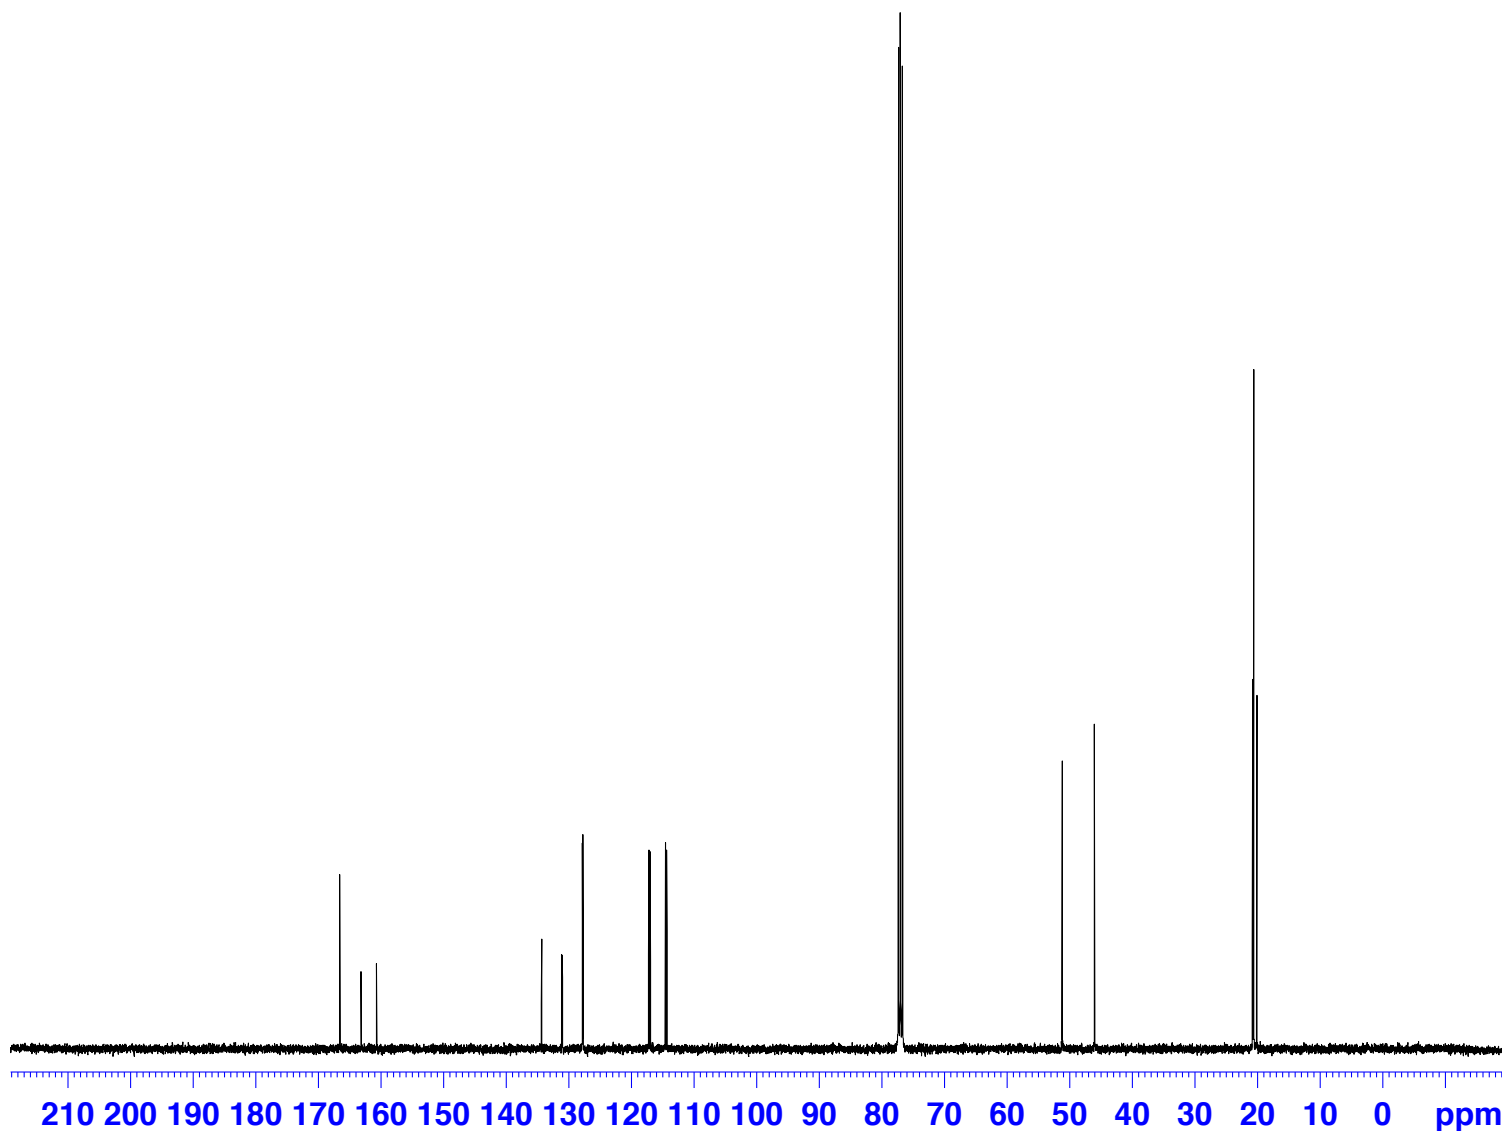

DK-XII-WW-99\_concentrated

user: we...  
team: research-kalyani-wolfel holder: 3  
solvent: CDCl3 expt: PROTON NS=16;SW=20;  
standard 1H experiment ()

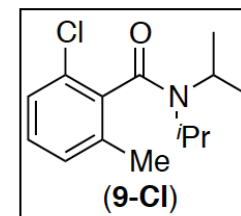

Current Data Parameters  
NAME Jul18-2013  
EXPNO 1552310  
PROCNO 1

F2 - Acquisition Parameters  
Date\_ 20130718  
Time 18.52  
INSTRUM spect  
PROBHD 5 mm BBO 1H/13  
PULPROG zg30  
TD 65536  
SOLVENT CDCl3  
NS 16  
DS 2  
SWH 8012.820 Hz  
FIDRES 0.122266 Hz  
AQ 4.0894966 sec  
RG 181  
DW 62.400 usec  
DE 6.00 usec  
TE 300.0 K  
D1 1.00000000 sec

===== CHANNEL f1 =====  
NUC1 1H  
P1 11.75 usec  
PL1 -4.00 dB  
SFO1 400.1324710 MHz

F2 - Processing parameters  
SI 32768  
SF 400.1300000 MHz  
WDW EM  
SSB 0  
LB 0.30 Hz  
GB 0  
PC 1.00

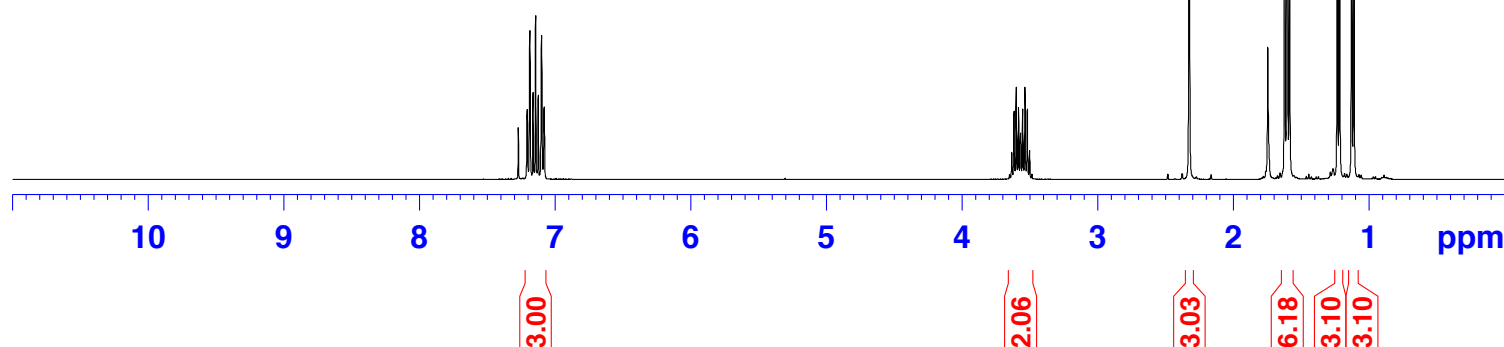

DK-XII-WW-99\_concentrated

user: we...  
team: research-kalyani-wolfel holder: 3  
solvent: CDCl3 expt: C13CPD32 NS=4096;D1=2;  
standard C13 experiment ()

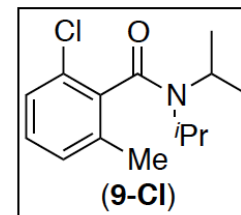

Current Data Parameters  
NAME Jul18-2013  
EXPNO 1552410  
PROCNO 1

F2 - Acquisition Parameters  
Date\_ 20130718  
Time 22.43  
INSTRUM spect  
PROBHD 5 mm BBO 1H/13  
PULPROG zgpg30  
TD 65536  
SOLVENT CDCl3  
NS 4096  
DS 2  
SWH 23980.814 Hz  
FIDRES 0.365918 Hz  
AQ 1.3664756 sec  
RG 1024  
DW 20.850 usec  
DE 6.00 usec  
TE 300.0 K  
D1 2.00000000 sec  
d11 0.03000000 sec  
d12 0.00002000 sec

===== CHANNEL f1 =====  
NUC1 13C  
P1 9.00 usec  
PL1 -4.50 dB  
SFO1 100.6228298 MHz

===== CHANNEL f2 =====  
CPDPRG2 waltz16  
NUC2 1H  
PCPD2 90.00 usec  
PL2 -4.00 dB  
PL12 13.68 dB  
PL13 17.24 dB  
SFO2 400.1316005 MHz

F2 - Processing parameters  
SI 32768  
SF 100.6127690 MHz  
WDW EM

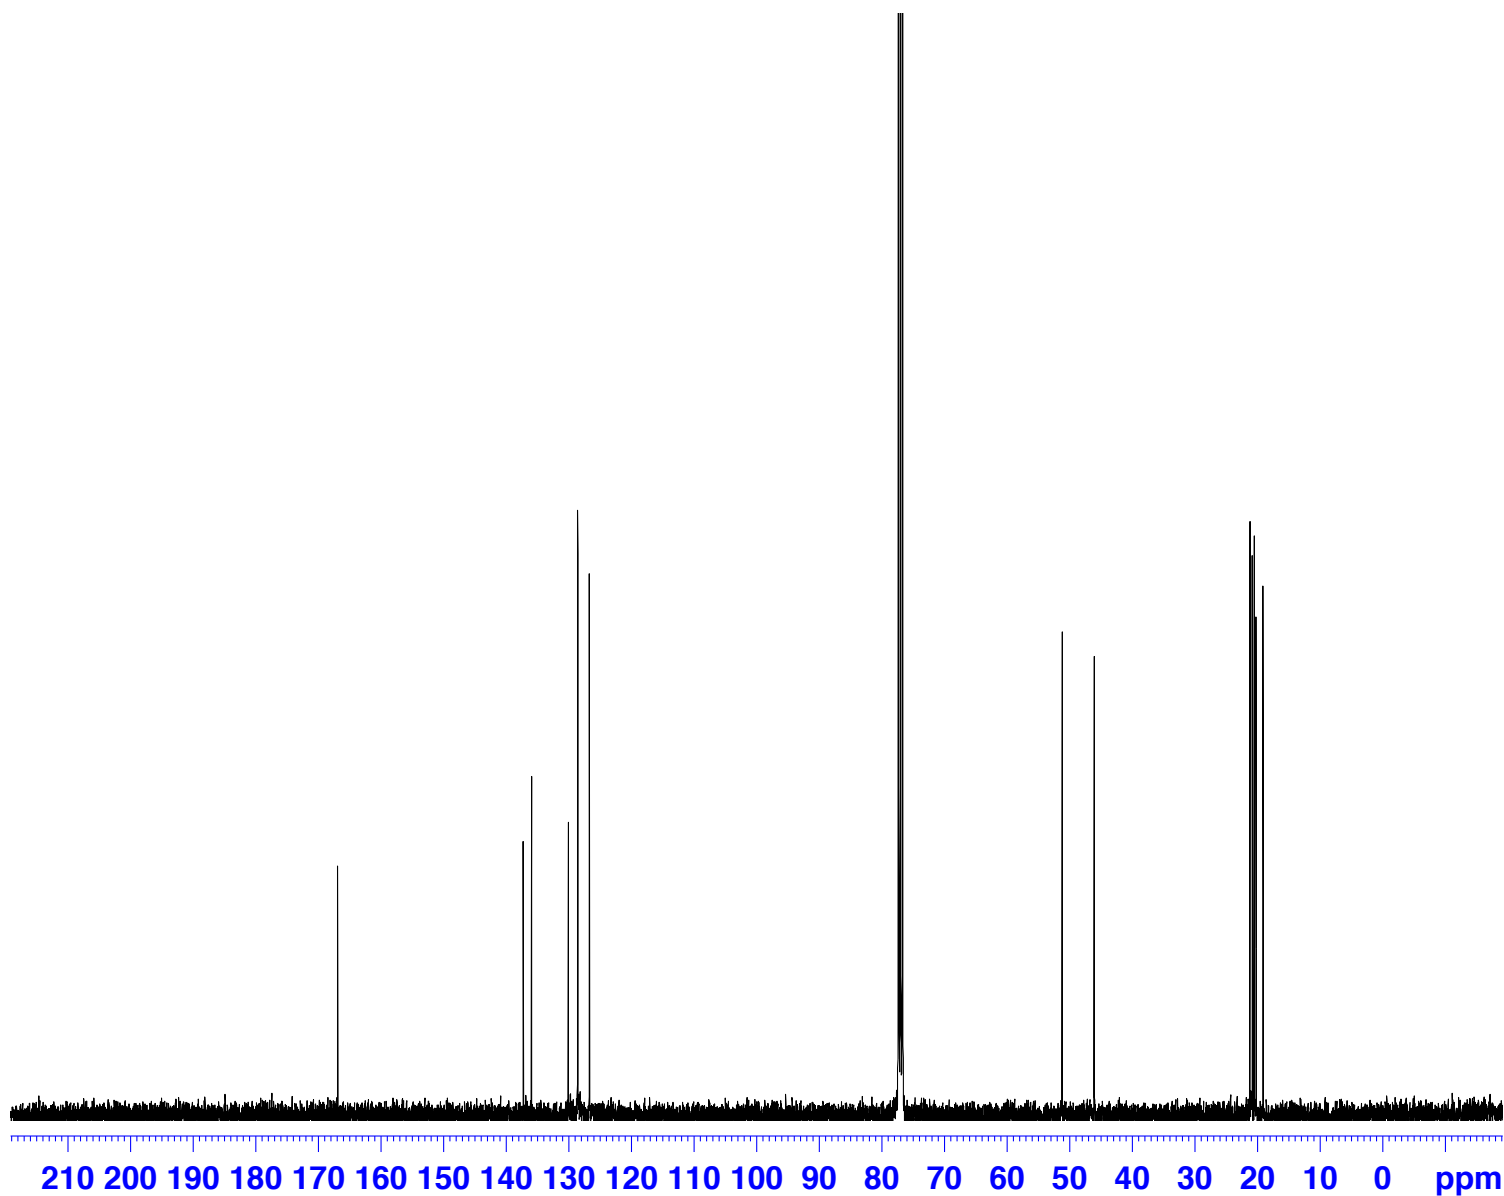

DK-VIII-LW-113 Concentrated

user: we...  
team: research-kalyani holder: 14  
solvent: CDCl3 expt: PROTON NS=16;SW=20;  
standard 1H experiment ()

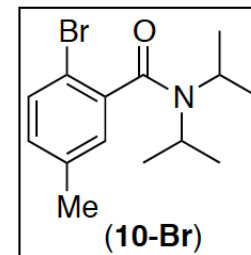

Current Data Parameters  
NAME Jul20-2013  
EXPNO 1556910  
PROCNO 1

F2 - Acquisition Parameters  
Date\_ 20130720  
Time 21.23  
INSTRUM spect  
PROBHD 5 mm BBO 1H/13  
PULPROG zg30  
TD 65536  
SOLVENT CDCl3  
NS 16  
DS 2  
SWH 8012.820 Hz  
FIDRES 0.122266 Hz  
AQ 4.0894966 sec  
RG 114  
DW 62.400 usec  
DE 6.00 usec  
TE 300.0 K  
D1 1.00000000 sec

===== CHANNEL f1 =====  
NUC1 1H  
P1 11.75 usec  
PL1 -4.00 dB  
SFO1 400.1324710 MHz

F2 - Processing parameters  
SI 32768  
SF 400.1300000 MHz  
WDW EM  
SSB 0  
LB 0.30 Hz  
GB 0  
PC 1.00

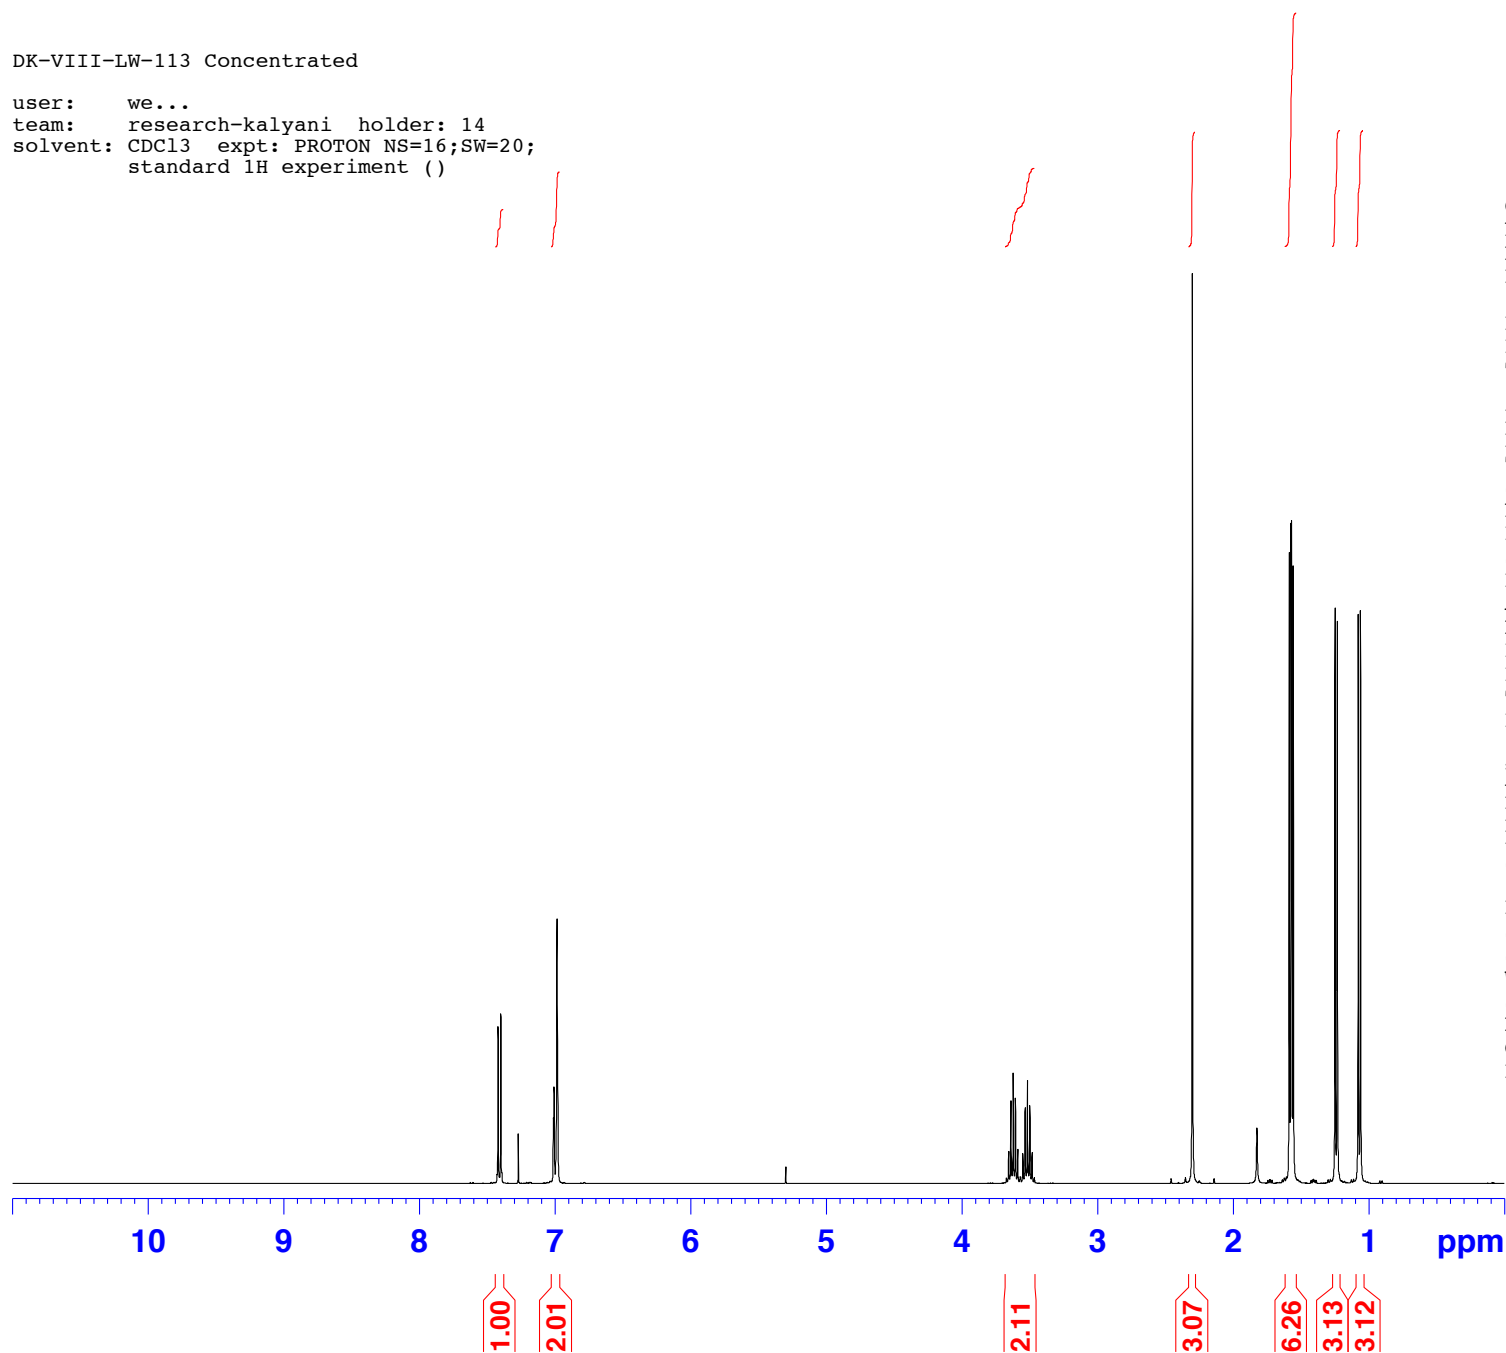



DK-VIII-LW-113 Concentrated

user: we...  
team: research-kalyani holder: 14  
solvent: CDCl3 expt: C13CPD32 NS=2048;D1=2;  
standard C13 experiment ()

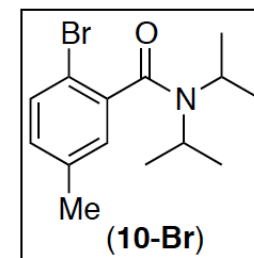

Current Data Parameters  
NAME Jul20-2013  
EXPNO 1557010  
PROCNO 1

F2 - Acquisition Parameters  
Date\_ 20130720  
Time 23.28  
INSTRUM spect  
PROBHD 5 mm BBO 1H/13  
PULPROG zgpg30  
TD 65536  
SOLVENT CDCl3  
NS 2048  
DS 2  
SWH 23980.814 Hz  
FIDRES 0.365918 Hz  
AQ 1.3664756 sec  
RG 3251  
DW 20.850 usec  
DE 6.00 usec  
TE 300.0 K  
D1 2.00000000 sec  
d11 0.03000000 sec  
d12 0.00002000 sec

===== CHANNEL f1 =====  
NUC1 13C  
P1 9.00 usec  
PL1 -4.50 dB  
SFO1 100.6228298 MHz

===== CHANNEL f2 =====  
CPDPRG2 waltz16  
NUC2 1H  
PCPD2 90.00 usec  
PL2 -4.00 dB  
PL12 13.68 dB  
PL13 17.24 dB  
SFO2 400.1316005 MHz

F2 - Processing parameters  
SI 32768  
SF 100.6127690 MHz  
WDW EM

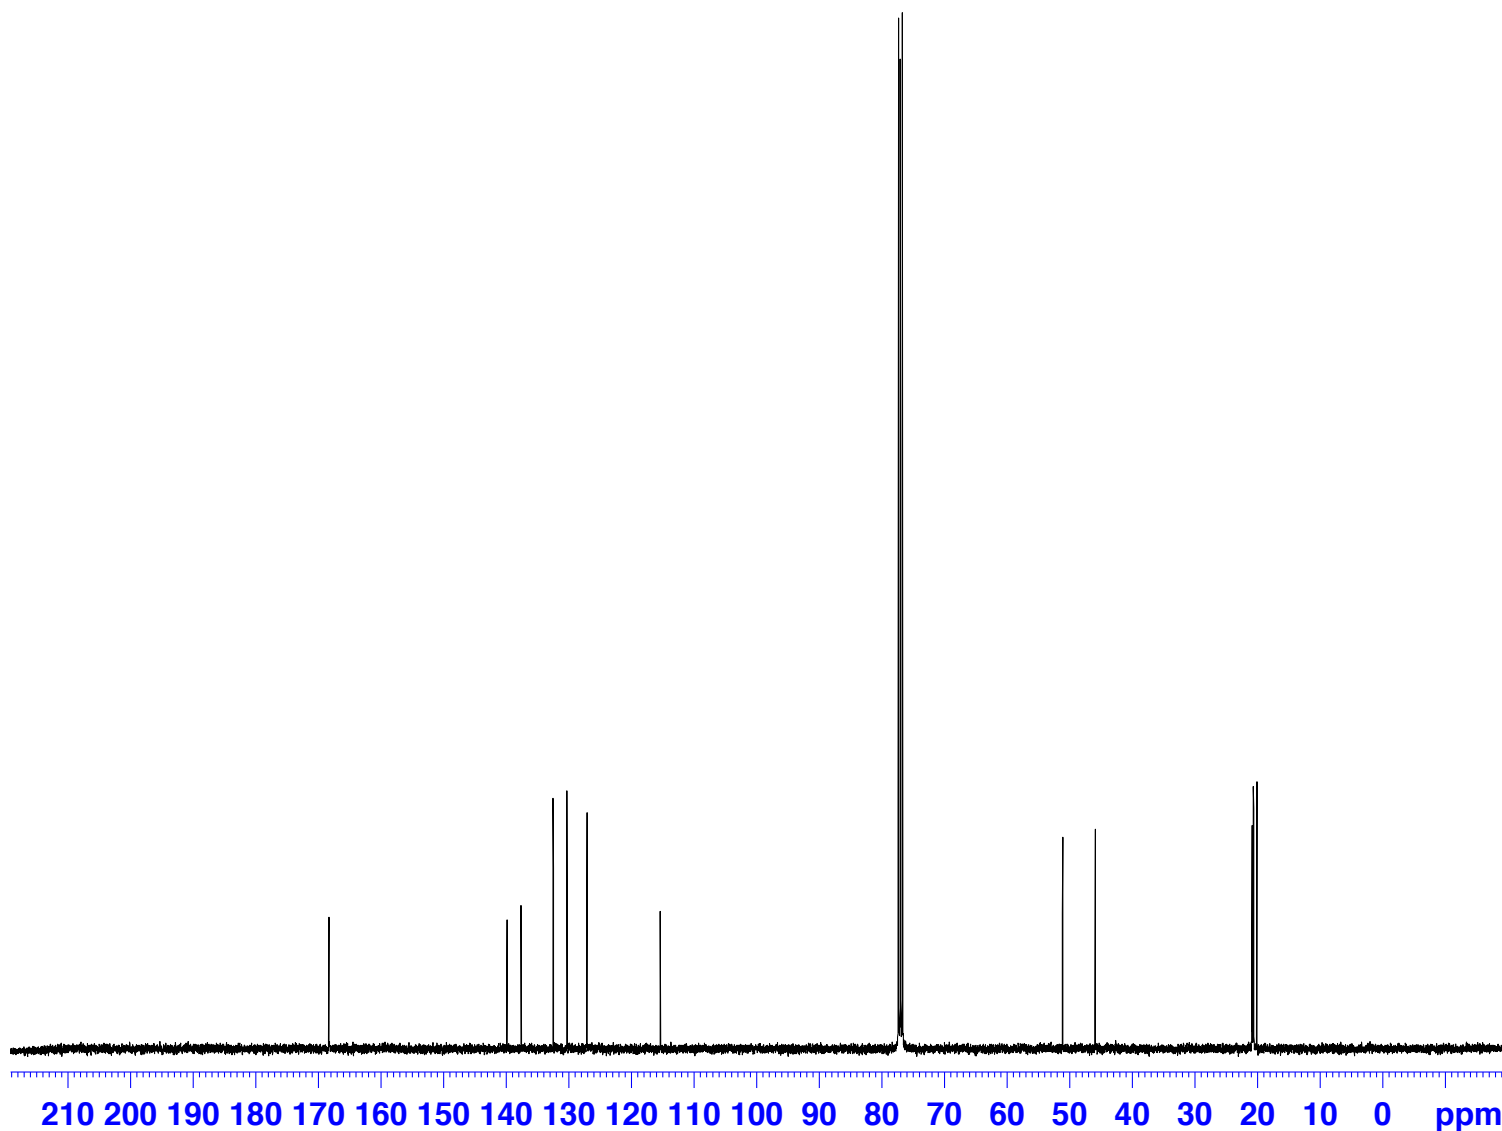

DK-XII-WW-36 Concentrated

user: we...  
team: research-kalyani holder: 8  
solvent: CDCl3 expt: PROTON NS=128;SW=20;  
standard 1H experiment ()

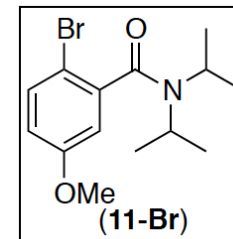

Current Data Parameters  
NAME Jul05-2013  
EXPNO 1529610  
PROCNO 1

F2 - Acquisition Parameters  
Date\_ 20130706  
Time 5.04  
INSTRUM spect  
PROBHD 5 mm BBO 1H/13  
PULPROG zg30  
TD 65536  
SOLVENT CDCl3  
NS 128  
DS 2  
SWH 8012.820 Hz  
FIDRES 0.122266 Hz  
AQ 4.0894966 sec  
RG 161.3  
DW 62.400 usec  
DE 6.00 usec  
TE 300.0 K  
D1 1.00000000 sec

===== CHANNEL f1 =====  
NUC1 1H  
P1 11.75 usec  
PL1 -4.00 dB  
SFO1 400.1324710 MHz

F2 - Processing parameters  
SI 32768  
SF 400.1300000 MHz  
WDW EM  
SSB 0  
LB 0.30 Hz  
GB 0  
PC 1.00

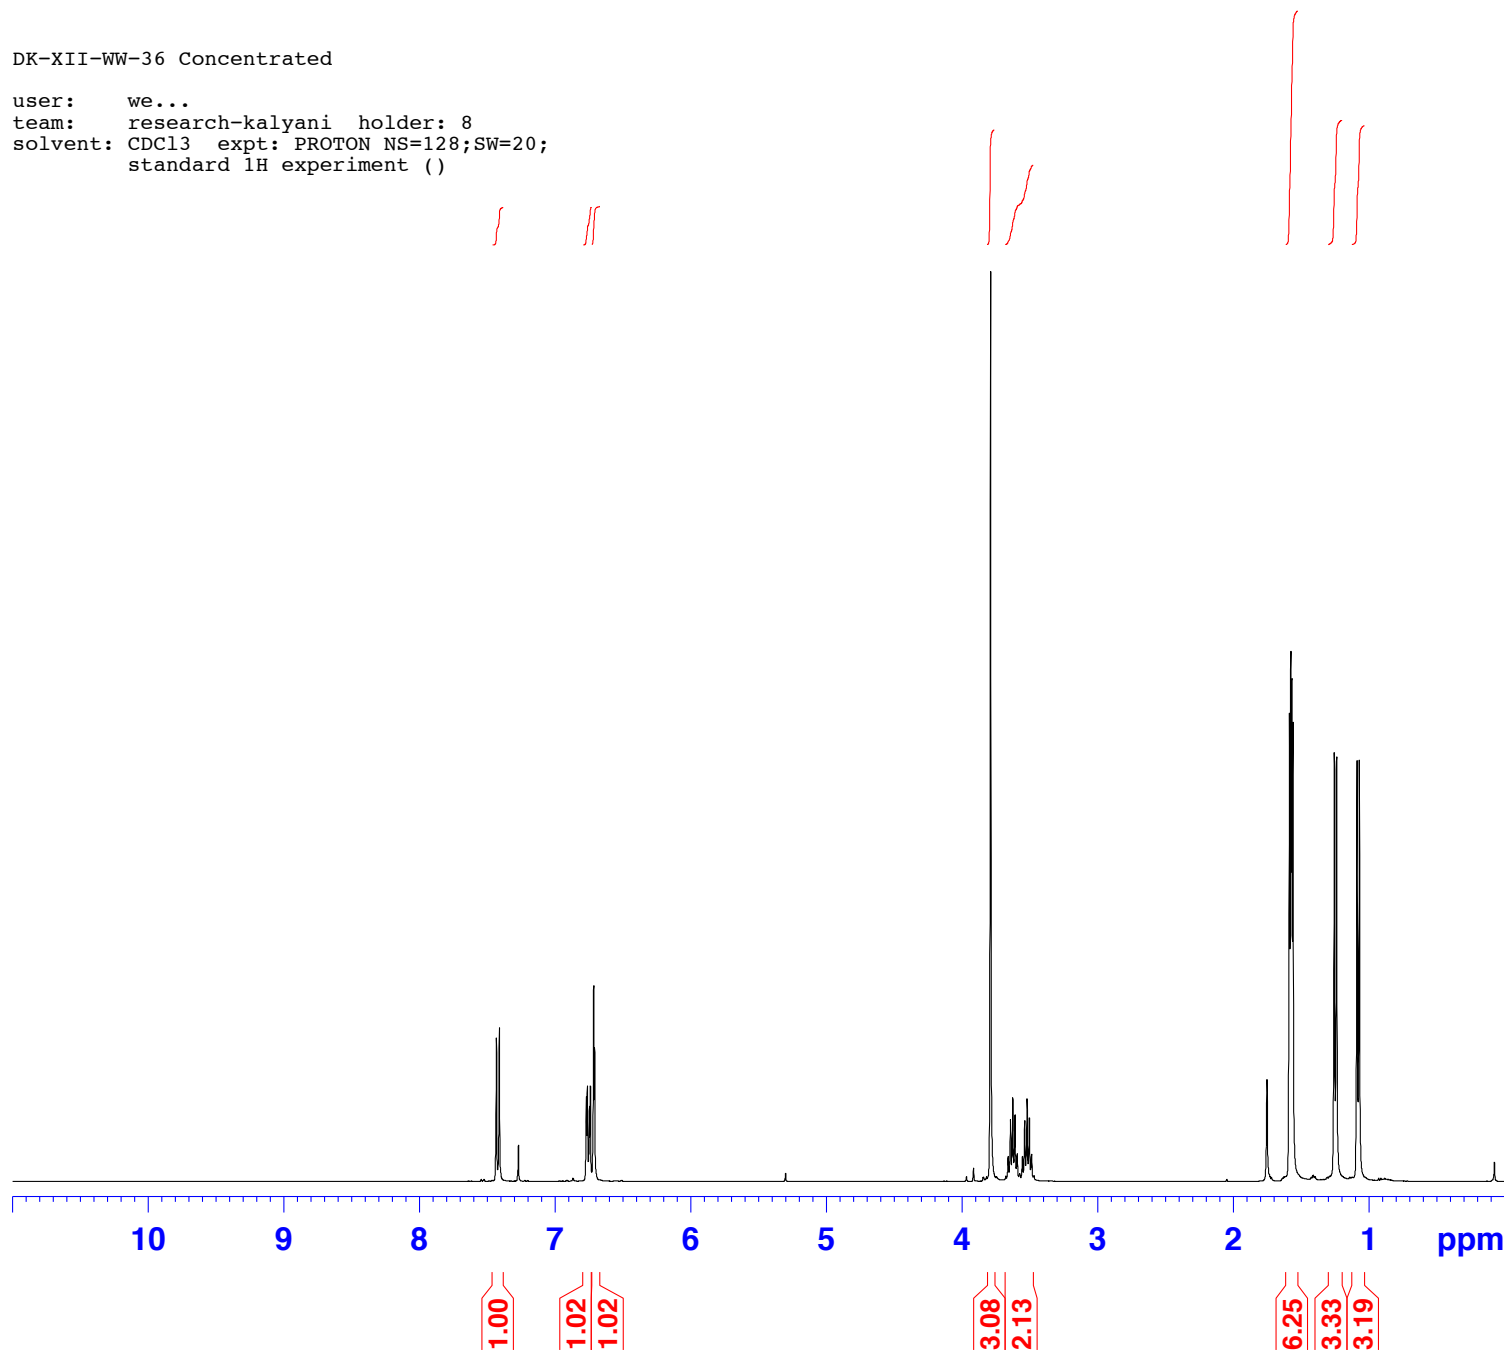

DK-XII-WW-36 Concentrated

user: we...  
team: research-kalyani holder: 8  
solvent: CDCl3 expt: C13CPD32 NS=8000;D1=2;  
standard C13 experiment ()

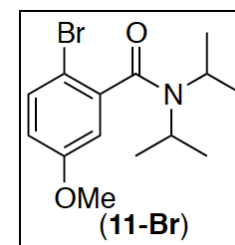

Current Data Parameters  
NAME Jul05-2013  
EXPNO 1529210  
PROCNO 1

F2 - Acquisition Parameters  
Date\_ 20130706  
Time 0.37  
INSTRUM spect  
PROBHD 5 mm BBO 1H/13  
PULPROG zgpg30  
TD 65536  
SOLVENT CDCl3  
NS 8000  
DS 2  
SWH 23980.814 Hz  
FIDRES 0.365918 Hz  
AQ 1.3664756 sec  
RG 13004  
DW 20.850 usec  
DE 6.00 usec  
TE 300.0 K  
D1 2.00000000 sec  
d11 0.03000000 sec  
d12 0.00002000 sec

===== CHANNEL f1 =====  
NUC1 13C  
P1 9.00 usec  
PL1 -4.50 dB  
SFO1 100.6228298 MHz

===== CHANNEL f2 =====  
CPDPRG2 waltz16  
NUC2 1H  
PCPD2 90.00 usec  
PL2 -4.00 dB  
PL12 13.68 dB  
PL13 17.24 dB  
SFO2 400.1316005 MHz

F2 - Processing parameters  
SI 32768  
SF 100.6127690 MHz  
WDW EM

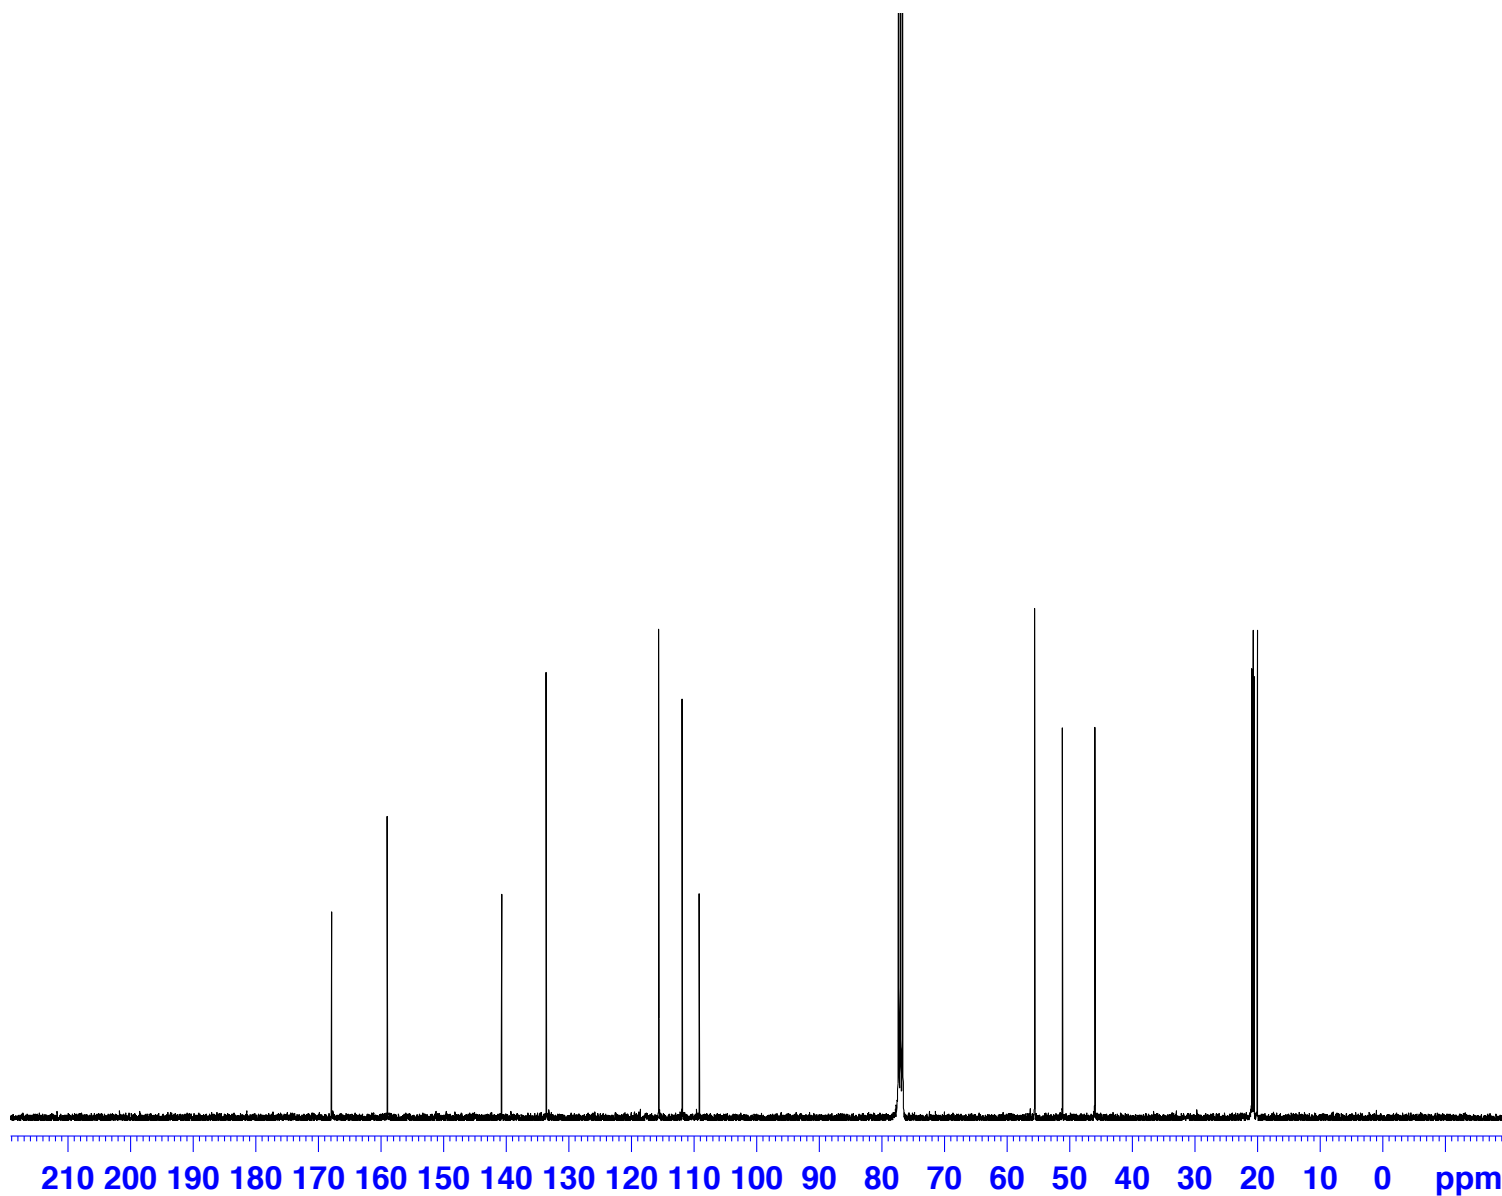

DK-XII-WW-61 Concentrated and Dried

user: we...  
team: research-kalyani-wertjes holder: 6  
solvent: CDCl3 expt: PROTON NS=16;SW=20;  
standard 1H experiment ()

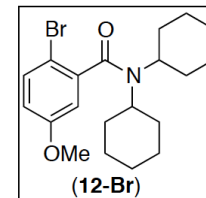

Current Data Parameters  
NAME Jun22-2013  
EXPNO 1496210  
PROCNO 1

F2 - Acquisition Parameters  
Date\_ 20130622  
Time 15.07  
INSTRUM spect  
PROBHD 5 mm BBO 1H/13  
PULPROG zg30  
TD 65536  
SOLVENT CDCl3  
NS 16  
DS 2  
SWH 8012.820 Hz  
FIDRES 0.122266 Hz  
AQ 4.0894966 sec  
RG 57  
DW 62.400 usec  
DE 6.00 usec  
TE 300.0 K  
D1 1.00000000 sec

===== CHANNEL f1 =====  
NUC1 1H  
P1 11.75 usec  
PL1 -4.00 dB  
SFO1 400.1324710 MHz

F2 - Processing parameters  
SI 32768  
SF 400.1300000 MHz  
WDW EM  
SSB 0  
LB 0.30 Hz  
GB 0  
PC 1.00

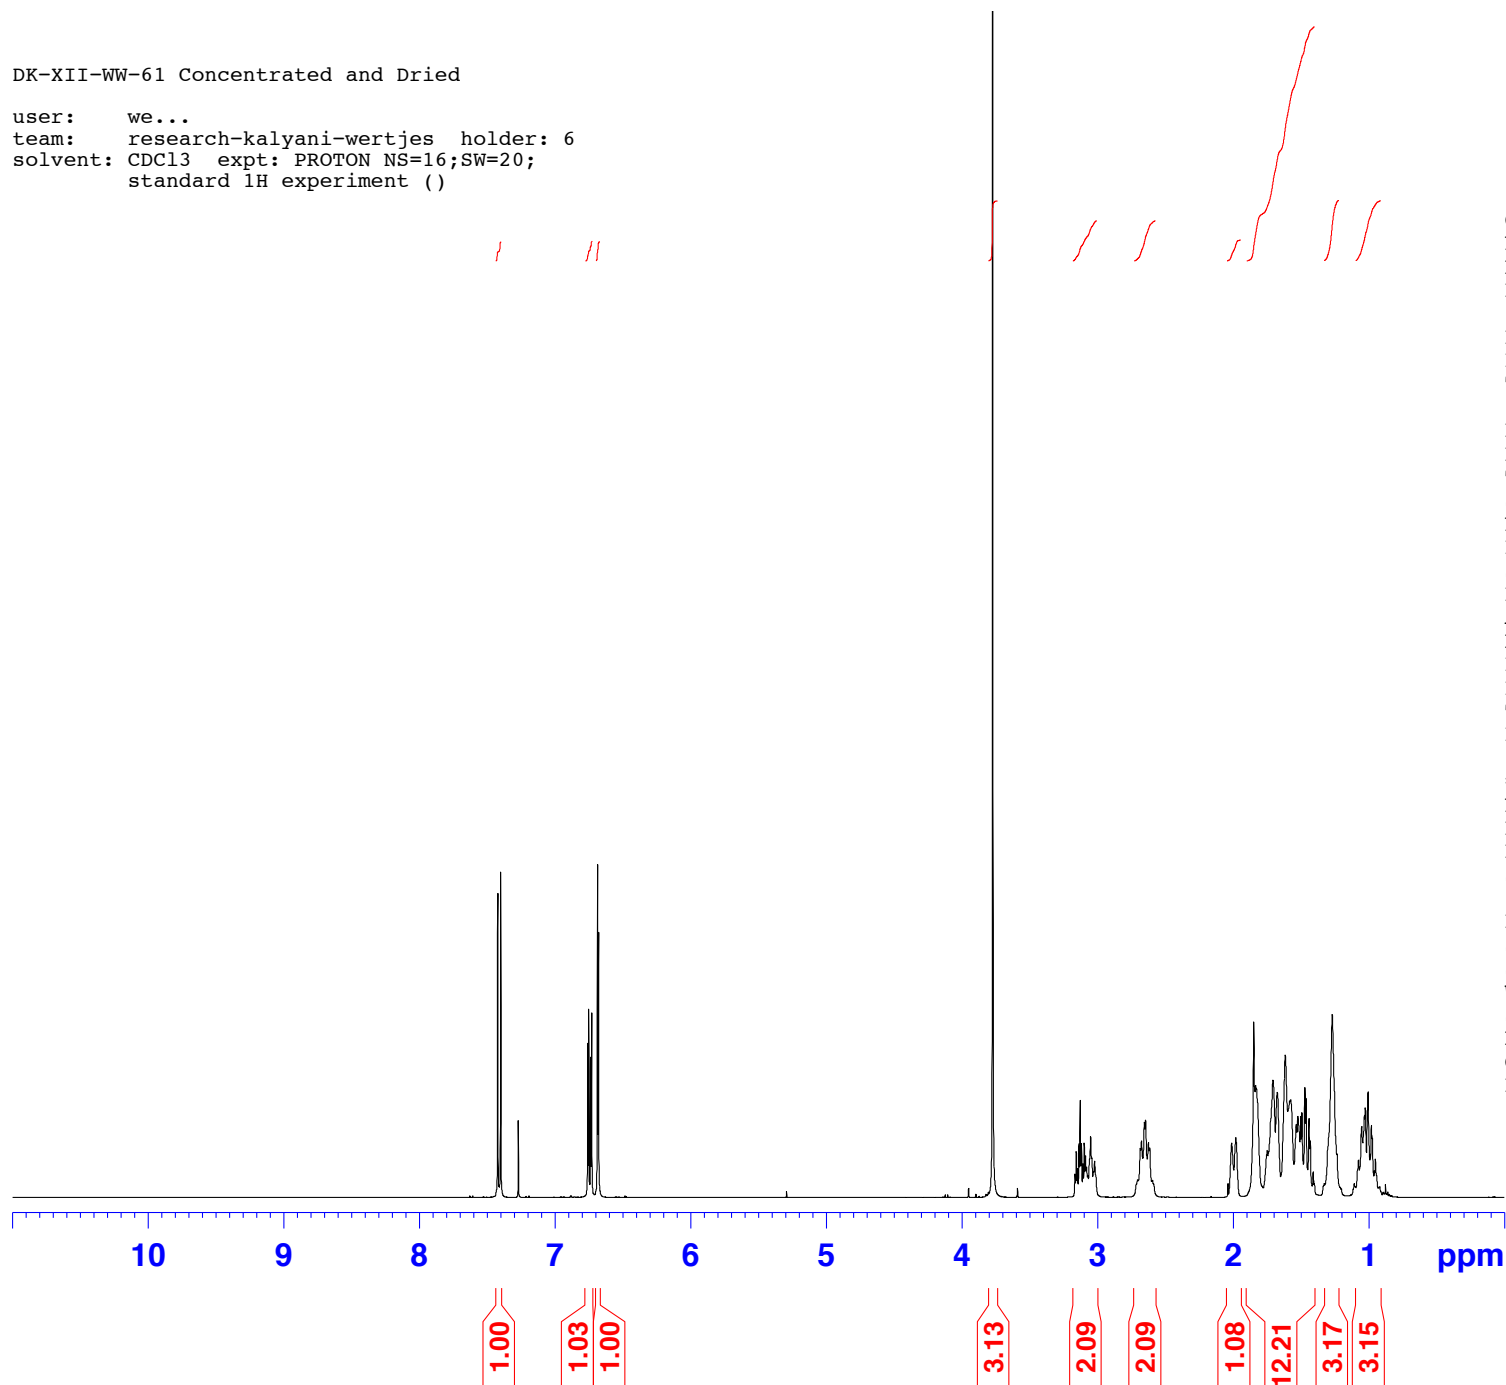

DK-XII-WW-61 Concentrated and Dried

user: we...  
team: research-kalyani-wertjes holder: 6  
solvent: CDCl3 expt: C13CPD32 NS=2048;D1=2;  
standard C13 experiment ()

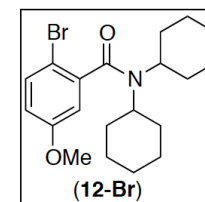

Current Data Parameters  
NAME Jun22-2013  
EXPNO 1496310  
PROCNO 1

F2 - Acquisition Parameters  
Date\_ 20130622  
Time 17.03  
INSTRUM spect  
PROBHD 5 mm BBO 1H/13  
PULPROG zgpg30  
TD 65536  
SOLVENT CDCl3  
NS 2048  
DS 2  
SWH 23980.814 Hz  
FIDRES 0.365918 Hz  
AQ 1.3664756 sec  
RG 1824.6  
DW 20.850 usec  
DE 6.00 usec  
TE 300.0 K  
D1 2.00000000 sec  
d11 0.03000000 sec  
d12 0.00002000 sec

===== CHANNEL f1 =====  
NUC1 13C  
P1 9.00 usec  
PL1 -4.50 dB  
SFO1 100.6228298 MHz

===== CHANNEL f2 =====  
CPDPRG2 waltz16  
NUC2 1H  
PCPD2 90.00 usec  
PL2 -4.00 dB  
PL12 13.68 dB  
PL13 17.24 dB  
SFO2 400.1316005 MHz

F2 - Processing parameters  
SI 32768  
SF 100.6127690 MHz  
WDW EM

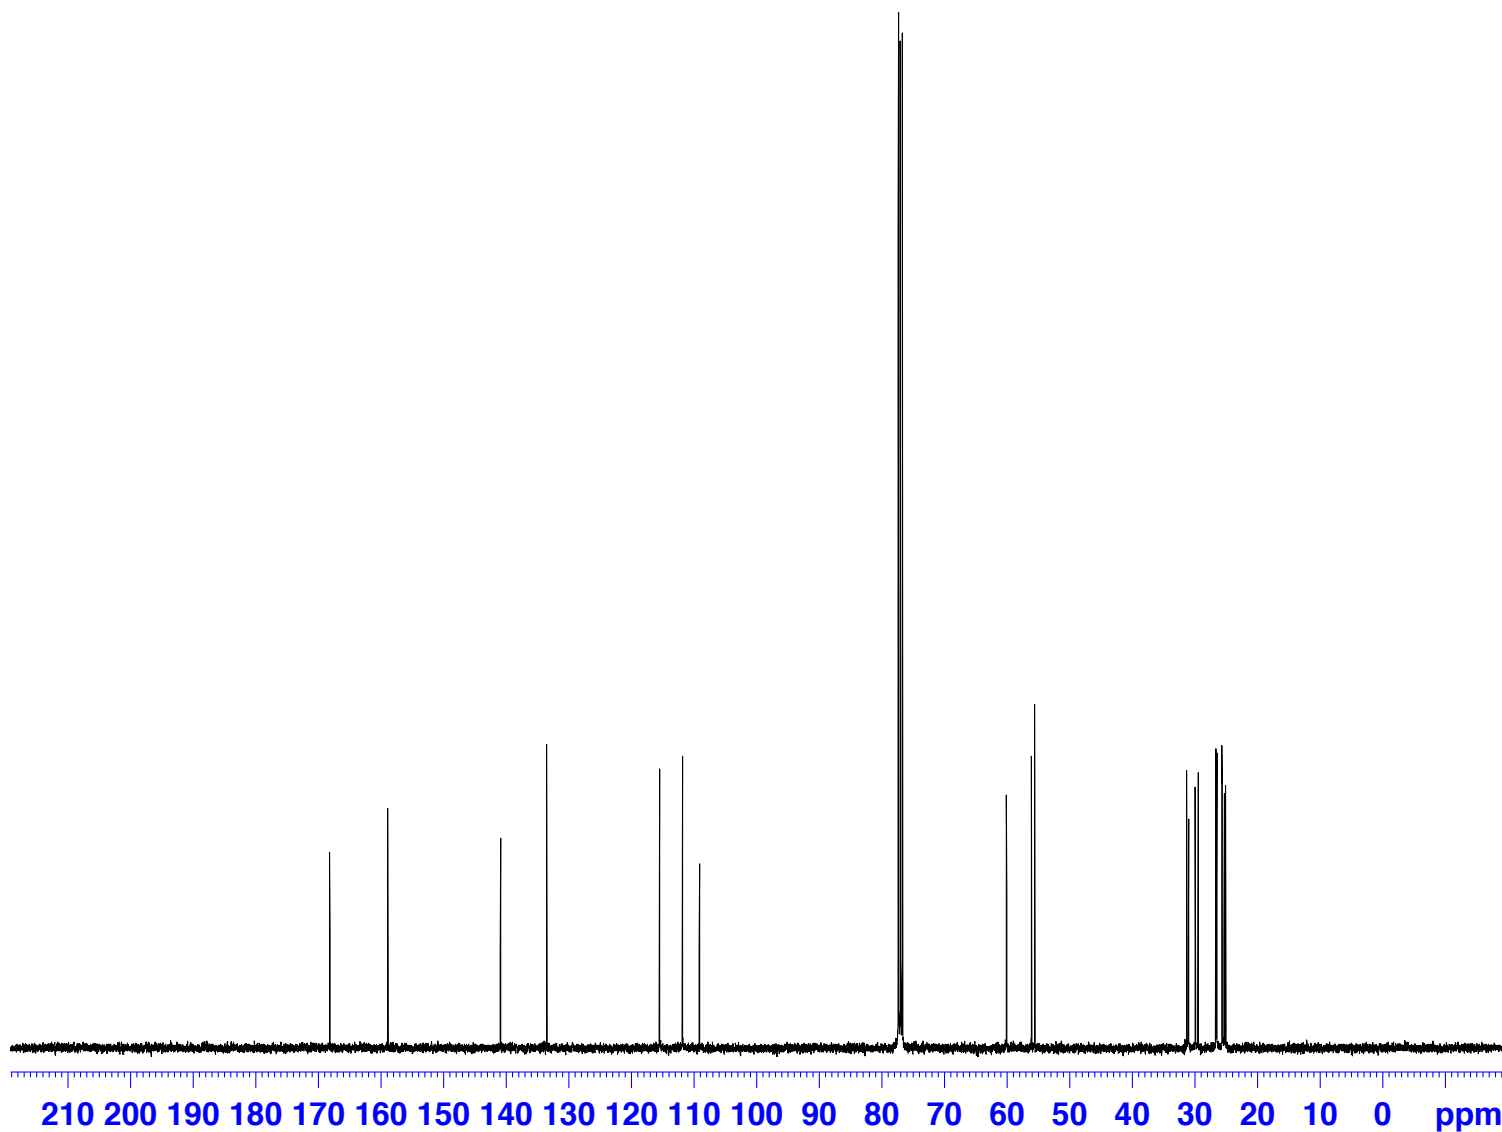

DK-VIII-LW-61 Column 2

user: we...  
team: research-kalyani holder: 1  
solvent: CDCl3 expt: PROTON NS=16;SW=20;  
standard 1H experiment ()

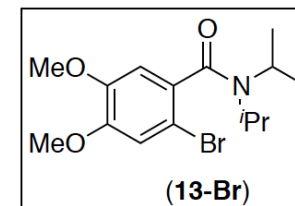

Current Data Parameters  
NAME Jul23-2013  
EXPNO 1561210  
PROCNO 1

F2 - Acquisition Parameters  
Date\_ 20130723  
Time 12.06  
INSTRUM spect  
PROBHD 5 mm BBO 1H/13  
PULPROG zg30  
TD 65536  
SOLVENT CDCl3  
NS 16  
DS 2  
SWH 8012.820 Hz  
FIDRES 0.122266 Hz  
AQ 4.0894966 sec  
RG 362  
DW 62.400 usec  
DE 6.00 usec  
TE 300.0 K  
D1 1.00000000 sec

===== CHANNEL f1 =====  
NUC1 1H  
P1 11.75 usec  
PL1 -4.00 dB  
SFO1 400.1324710 MHz

F2 - Processing parameters  
SI 32768  
SF 400.1300000 MHz  
WDW EM  
SSB 0  
LB 0.30 Hz  
GB 0  
PC 1.00

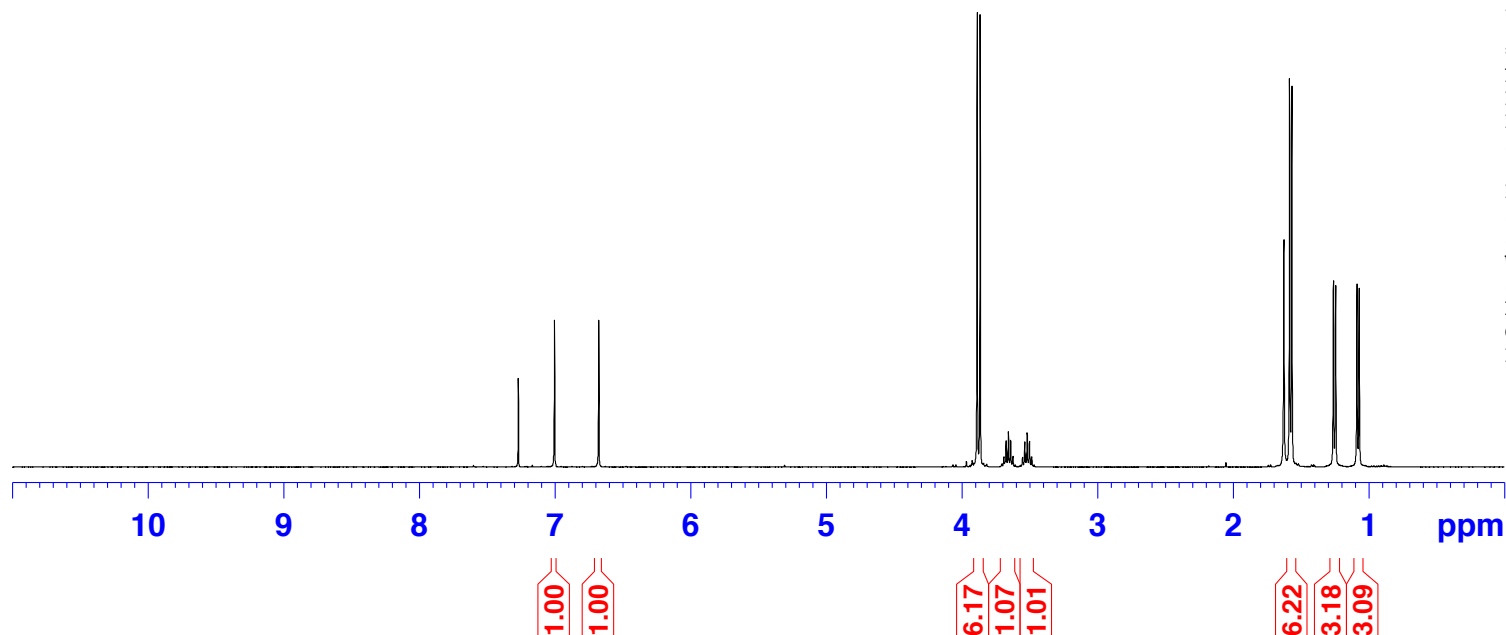

DK-VIII-LW-61 Concentrated

user: we...  
team: research-kalyani holder: 8  
solvent: CDCl3 expt: C13CPD32 NS=2048;D1=2;  
standard C13 experiment ()

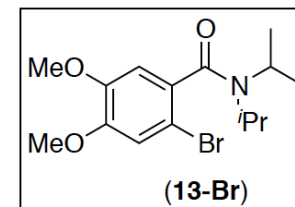

Current Data Parameters  
NAME Jun29-2013  
EXPNO 1516510  
PROCNO 1

F2 - Acquisition Parameters  
Date\_ 20130629  
Time 18.04  
INSTRUM spect  
PROBHD 5 mm BBO 1H/13  
PULPROG zgpg30  
TD 65536  
SOLVENT CDCl3  
NS 2048  
DS 2  
SWH 23980.814 Hz  
FIDRES 0.365918 Hz  
AQ 1.3664756 sec  
RG 2048  
DW 20.850 usec  
DE 6.00 usec  
TE 300.0 K  
D1 2.00000000 sec  
d11 0.03000000 sec  
d12 0.00002000 sec

===== CHANNEL f1 =====  
NUC1 13C  
P1 9.00 usec  
PL1 -4.50 dB  
SFO1 100.6228298 MHz

===== CHANNEL f2 =====  
CPDPRG2 waltz16  
NUC2 1H  
PCPD2 90.00 usec  
PL2 -4.00 dB  
PL12 13.68 dB  
PL13 17.24 dB  
SFO2 400.1316005 MHz

F2 - Processing parameters  
SI 32768  
SF 100.6127690 MHz  
WDW EM

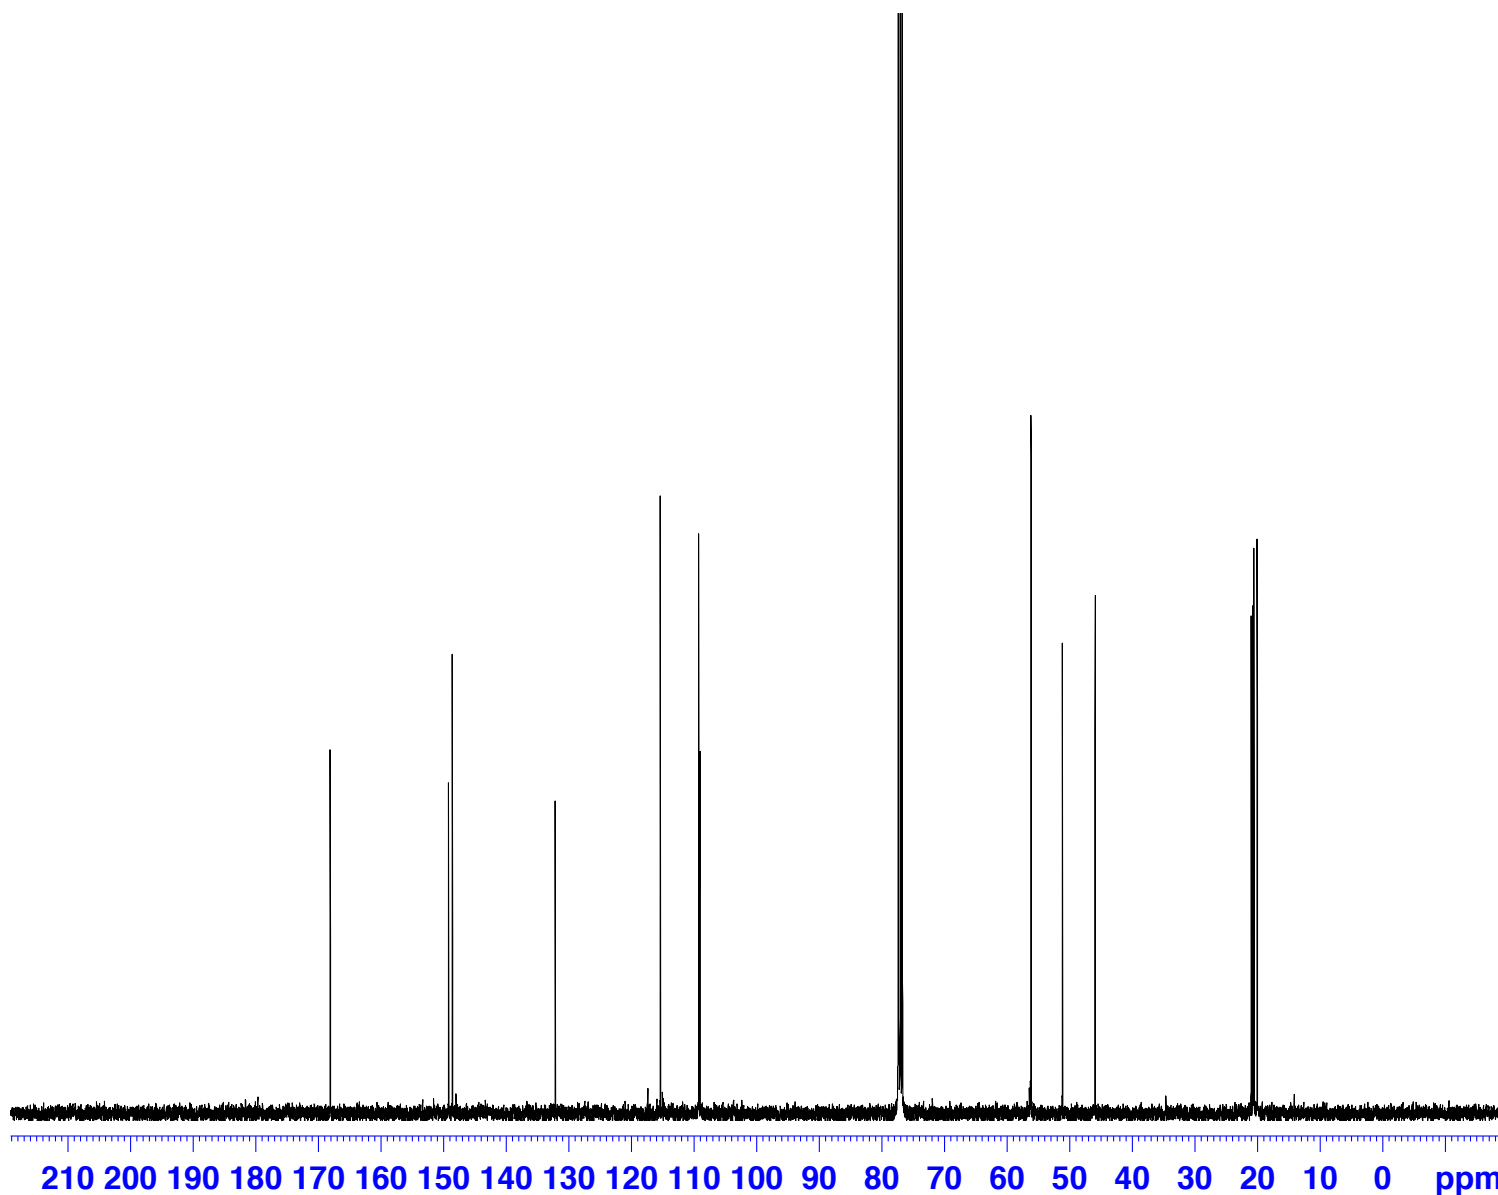

DK-XII-WW-38 Concentrated

user: we...  
team: research-kalyani holder: 7  
solvent: CDCl3 expt: PROTON NS=16;SW=20;  
standard 1H experiment ()

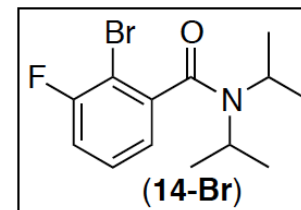

Current Data Parameters  
NAME Jun28-2013  
EXPNO 1515110  
PROCNO 1

F2 - Acquisition Parameters  
Date\_ 20130628  
Time 17.16  
INSTRUM spect  
PROBHD 5 mm BBO 1H/13  
PULPROG zg30  
TD 65536  
SOLVENT CDCl3  
NS 16  
DS 2  
SWH 8012.820 Hz  
FIDRES 0.122266 Hz  
AQ 4.0894966 sec  
RG 64  
DW 62.400 usec  
DE 6.00 usec  
TE 300.0 K  
D1 1.00000000 sec

===== CHANNEL f1 =====  
NUC1 1H  
P1 11.75 usec  
PL1 -4.00 dB  
SFO1 400.1324710 MHz

F2 - Processing parameters  
SI 32768  
SF 400.1300000 MHz  
WDW EM  
SSB 0  
LB 0.30 Hz  
GB 0  
PC 1.00

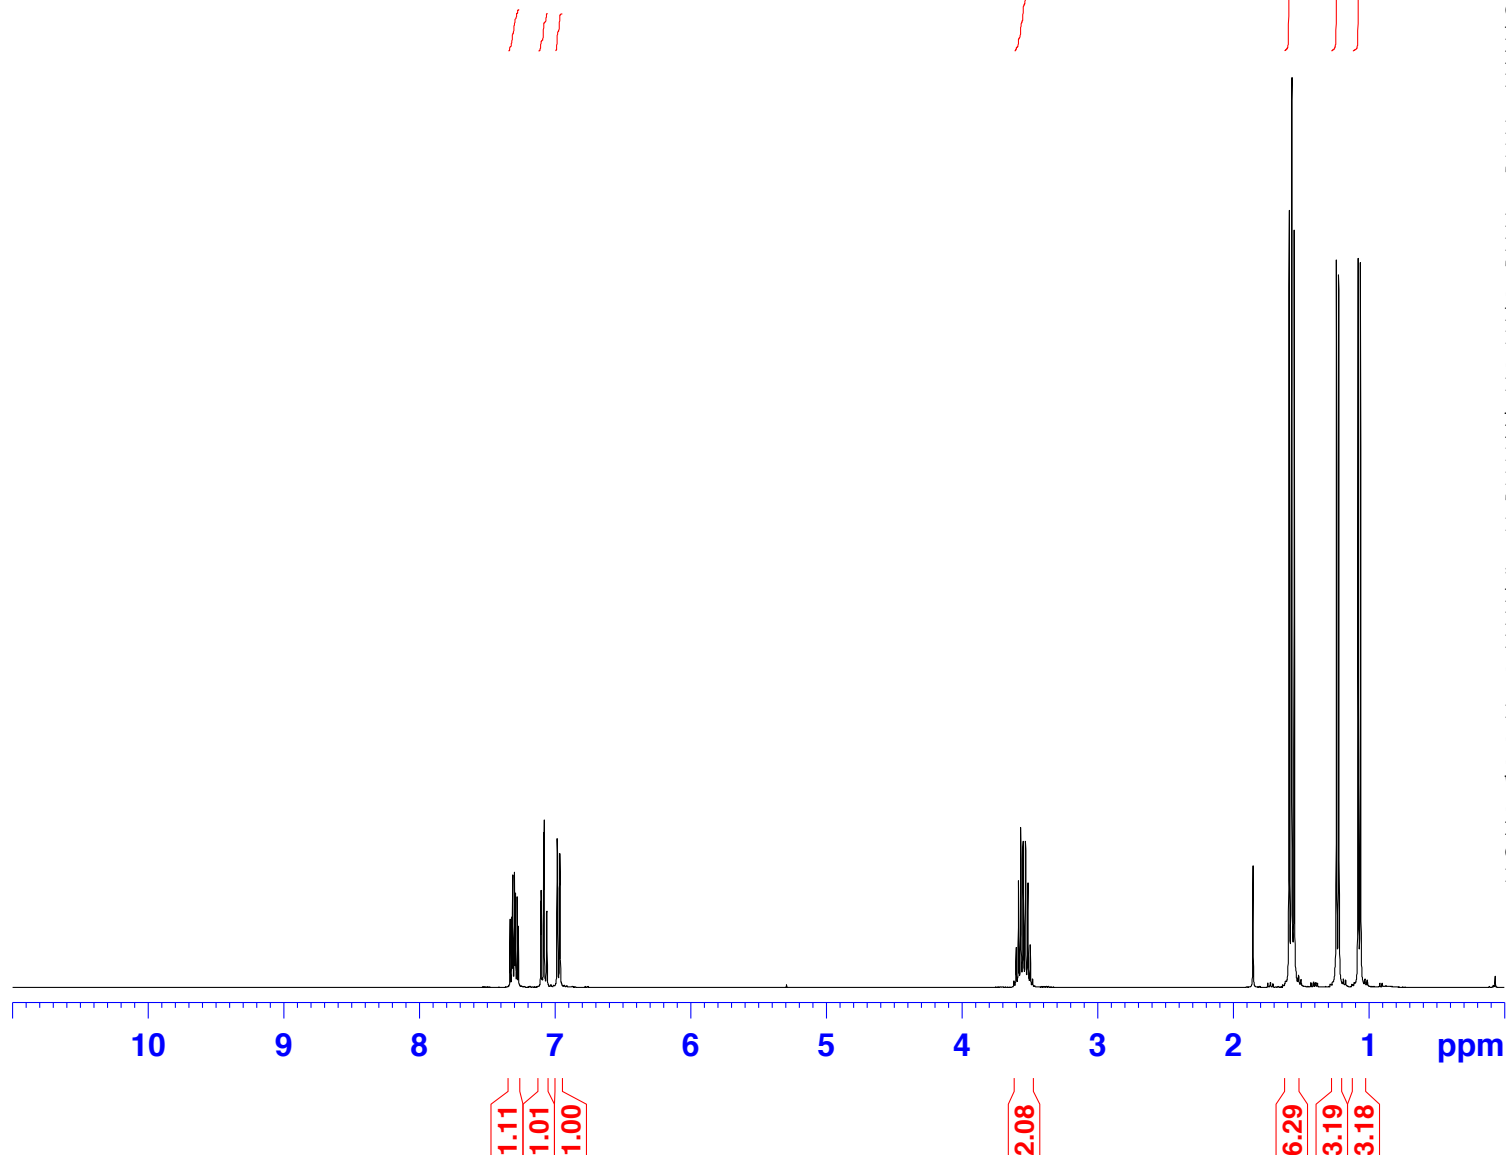



DK-XII-WW-38 Concentrated

user: we...  
team: research-kalyani holder: 7  
solvent: CDCl3 expt: C13CPD32 NS=2048;D1=2;  
standard C13 experiment ()

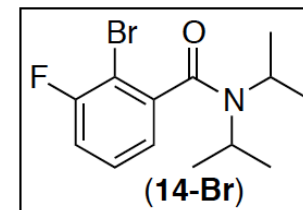

Current Data Parameters  
NAME Jun28-2013  
EXPNO 1515210  
PROCNO 1

F2 - Acquisition Parameters  
Date\_ 20130628  
Time 21.14  
INSTRUM spect  
PROBHD 5 mm BBO 1H/13  
PULPROG zgpg30  
TD 65536  
SOLVENT CDCl3  
NS 2048  
DS 2  
SWH 23980.814 Hz  
FIDRES 0.365918 Hz  
AQ 1.3664756 sec  
RG 1824.6  
DW 20.850 usec  
DE 6.00 usec  
TE 300.0 K  
D1 2.00000000 sec  
d11 0.03000000 sec  
d12 0.00002000 sec

===== CHANNEL f1 =====  
NUC1 13C  
P1 9.00 usec  
PL1 -4.50 dB  
SFO1 100.6228298 MHz

===== CHANNEL f2 =====  
CPDPRG2 waltz16  
NUC2 1H  
PCPD2 90.00 usec  
PL2 -4.00 dB  
PL12 13.68 dB  
PL13 17.24 dB  
SFO2 400.1316005 MHz

F2 - Processing parameters  
SI 32768  
SF 100.6127690 MHz  
WDW EM

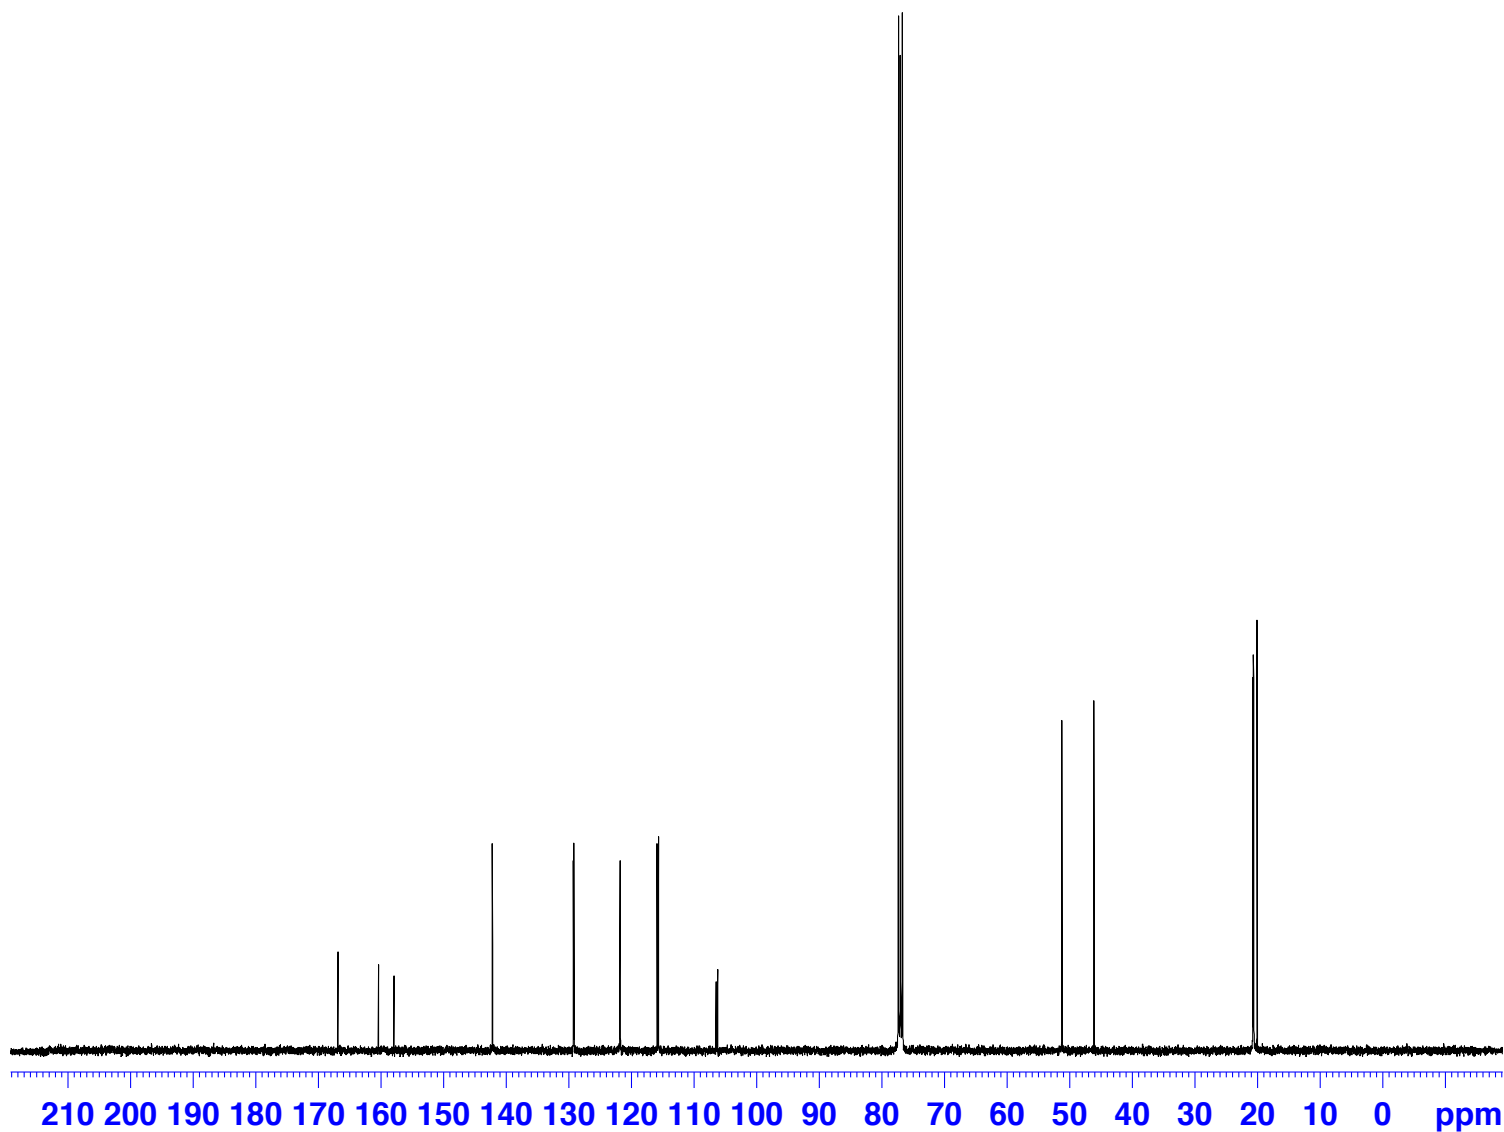

DK-VIII-LW-54\_concentrated

user: ru...  
team: research-kalyani-wolfel holder: 5  
solvent: CDCl3 expt: PROTON NS=16;SW=20;  
standard 1H experiment ()

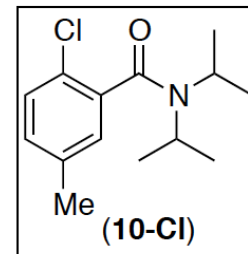

Current Data Parameters  
NAME Jun21-2013  
EXPNO 1495510  
PROCNO 1

F2 - Acquisition Parameters  
Date\_ 20130621  
Time 16.40  
INSTRUM spect  
PROBHD 5 mm BBO 1H/13  
PULPROG zg30  
TD 65536  
SOLVENT CDCl3  
NS 16  
DS 2  
SWH 8012.820 Hz  
FIDRES 0.122266 Hz  
AQ 4.0894966 sec  
RG 64  
DW 62.400 usec  
DE 6.00 usec  
TE 300.0 K  
D1 1.00000000 sec

===== CHANNEL f1 =====  
NUC1 1H  
P1 11.75 usec  
PL1 -4.00 dB  
SFO1 400.1324710 MHz

F2 - Processing parameters  
SI 32768  
SF 400.1300000 MHz  
WDW EM  
SSB 0  
LB 0.30 Hz  
GB 0  
PC 1.00

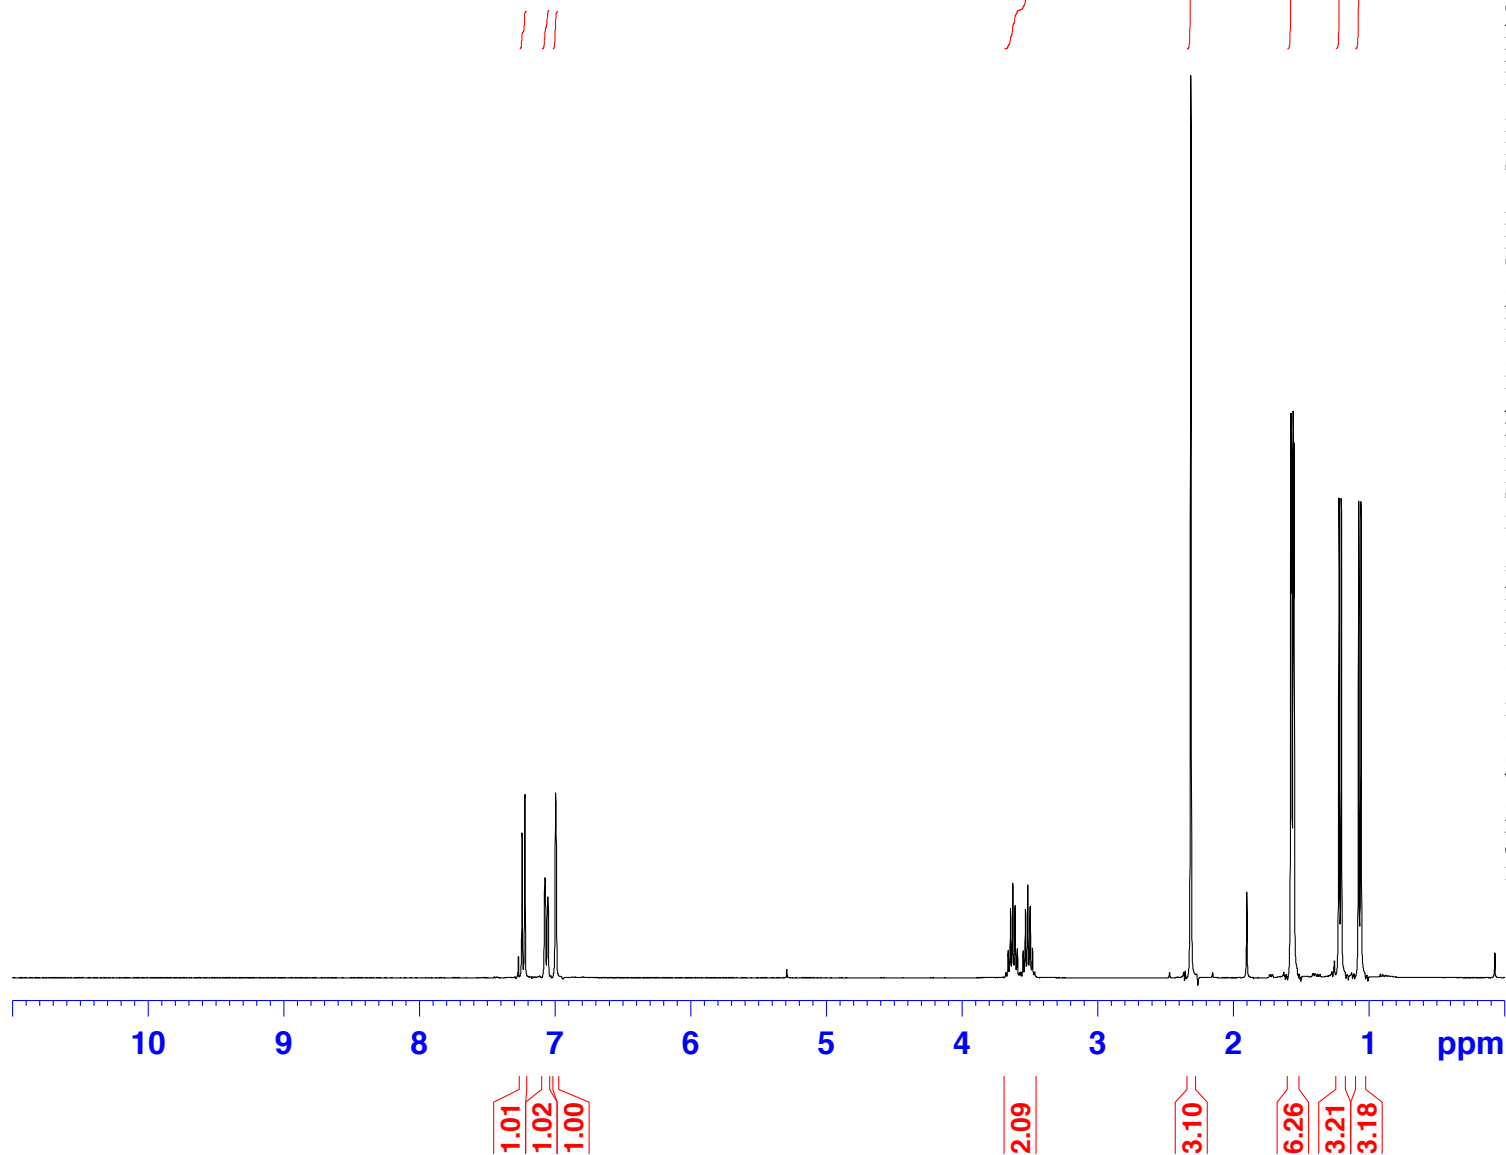

DK-VIII-LW-54\_concentrated

user: ru...  
team: research-kalyani-wolfel holder: 5  
solvent: CDCl3 expt: C13CPD32 NS=2048;D1=2;  
standard C13 experiment (1 Hr 55 Min 12 Sec)

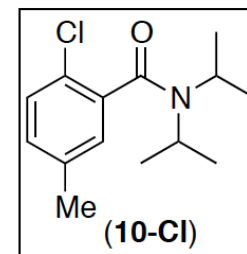

Current Data Parameters  
NAME Jun21-2013  
EXPNO 1495610  
PROCNO 1

F2 - Acquisition Parameters  
Date\_ 20130621  
Time 18.45  
INSTRUM spect  
PROBHD 5 mm BBO 1H/13  
PULPROG zgpg30  
TD 65536  
SOLVENT CDCl3  
NS 2048  
DS 2  
SWH 23980.814 Hz  
FIDRES 0.365918 Hz  
AQ 1.3664756 sec  
RG 1448.2  
DW 20.850 usec  
DE 6.00 usec  
TE 300.0 K  
D1 2.00000000 sec  
d11 0.03000000 sec  
d12 0.00002000 sec

===== CHANNEL f1 =====  
NUC1 13C  
P1 9.00 usec  
PL1 -4.50 dB  
SFO1 100.6228298 MHz

===== CHANNEL f2 =====  
CPDPRG2 waltz16  
NUC2 1H  
PCPD2 90.00 usec  
PL2 -4.00 dB  
PL12 13.68 dB  
PL13 17.24 dB  
SFO2 400.1316005 MHz

F2 - Processing parameters  
SI 32768  
SF 100.6127690 MHz  
WDW EM

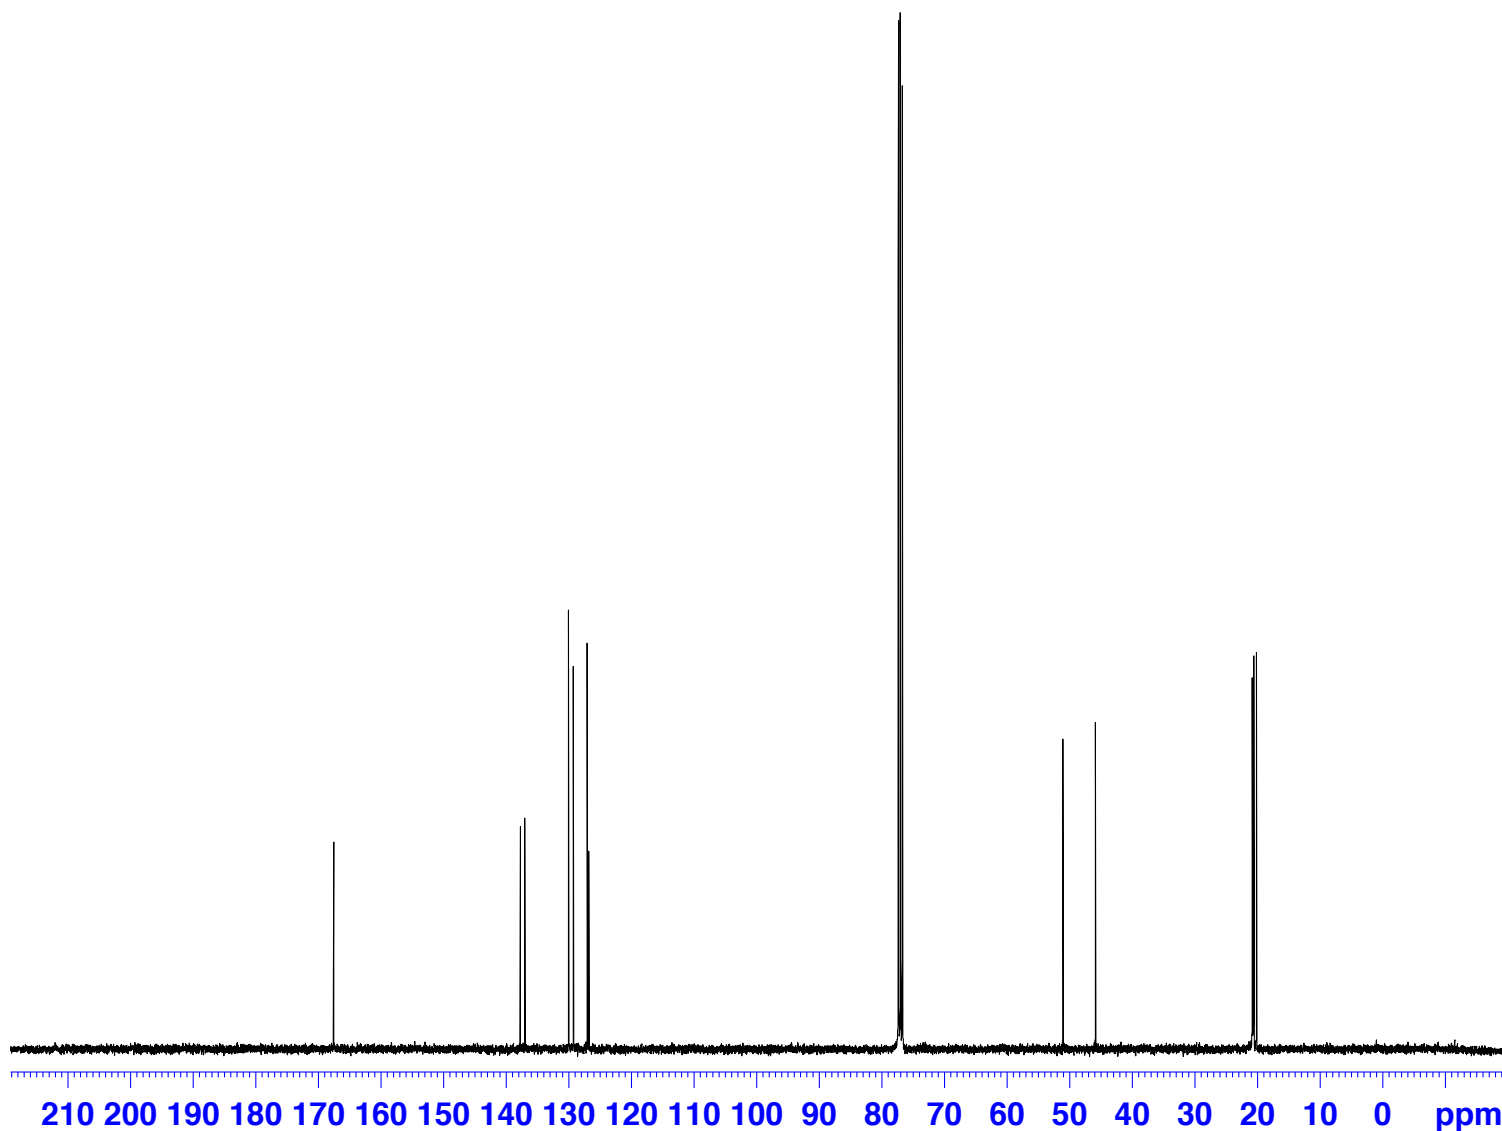

DK-VIII-WW-49 Concentrated

user: we...  
team: research-kalyani-wertjes holder: 11  
solvent: CDCl3 expt: PROTON NS=16;SW=20;  
standard 1H experiment ()

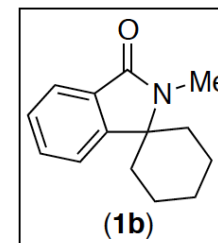

Current Data Parameters  
NAME Jun28-2013  
EXPNO 1515810  
PROCNO 1

F2 - Acquisition Parameters  
Date\_ 20130628  
Time 23.27  
INSTRUM spect  
PROBHD 5 mm BBO 1H/13  
PULPROG zg30  
TD 65536  
SOLVENT CDCl3  
NS 16  
DS 2  
SWH 8012.820 Hz  
FIDRES 0.122266 Hz  
AQ 4.0894966 sec  
RG 50.8  
DW 62.400 usec  
DE 6.00 usec  
TE 300.0 K  
D1 1.00000000 sec

===== CHANNEL f1 =====  
NUC1 1H  
P1 11.75 usec  
PL1 -4.00 dB  
SFO1 400.1324710 MHz

F2 - Processing parameters  
SI 32768  
SF 400.1300000 MHz  
WDW EM  
SSB 0  
LB 0.30 Hz  
GB 0  
PC 1.00

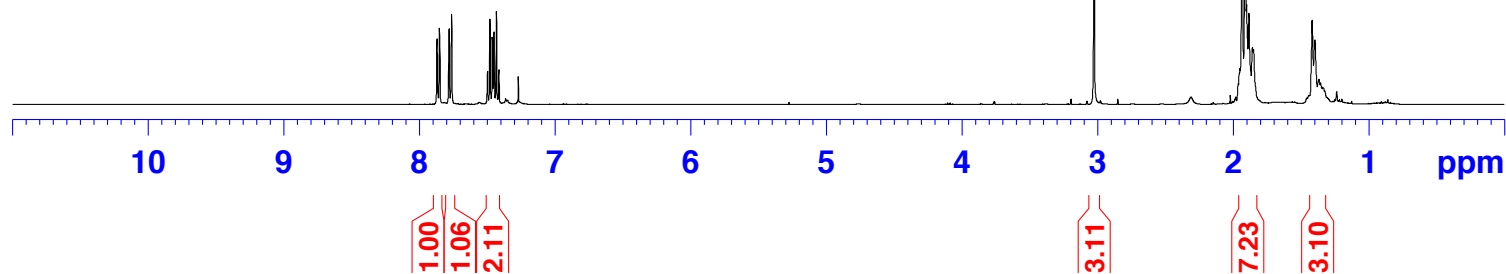

DK-VIII-WW-49 Concentrated

user: we...  
 team: research-kalyani-wertjes holder: 11  
 solvent: CDCl<sub>3</sub> expt: C13CPD32 NS=2048;D1=2;  
 standard C13 experiment ()

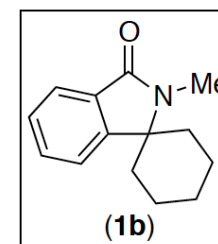

Current Data Parameters  
 NAME Jun28-2013  
 EXPNO 1515910  
 PROCNO 1

F2 - Acquisition Parameters  
 Date\_ 20130629  
 Time 1.23  
 INSTRUM spect  
 PROBHD 5 mm BBO 1H/13  
 PULPROG zgpg30  
 TD 65536  
 SOLVENT CDCl<sub>3</sub>  
 NS 2048  
 DS 2  
 SWH 23980.814 Hz  
 FIDRES 0.365918 Hz  
 AQ 1.3664756 sec  
 RG 2580.3  
 DW 20.850 usec  
 DE 6.00 usec  
 TE 300.0 K  
 D1 2.00000000 sec  
 d11 0.03000000 sec  
 d12 0.00002000 sec

===== CHANNEL f1 =====  
 NUC1 13C  
 P1 9.00 usec  
 PL1 -4.50 dB  
 SFO1 100.6228298 MHz

===== CHANNEL f2 =====  
 CPDPRG2 waltz16  
 NUC2 1H  
 PCPD2 90.00 usec  
 PL2 -4.00 dB  
 PL12 13.68 dB  
 PL13 17.24 dB  
 SFO2 400.1316005 MHz

F2 - Processing parameters  
 SI 32768  
 SF 100.6127690 MHz  
 WDW EM

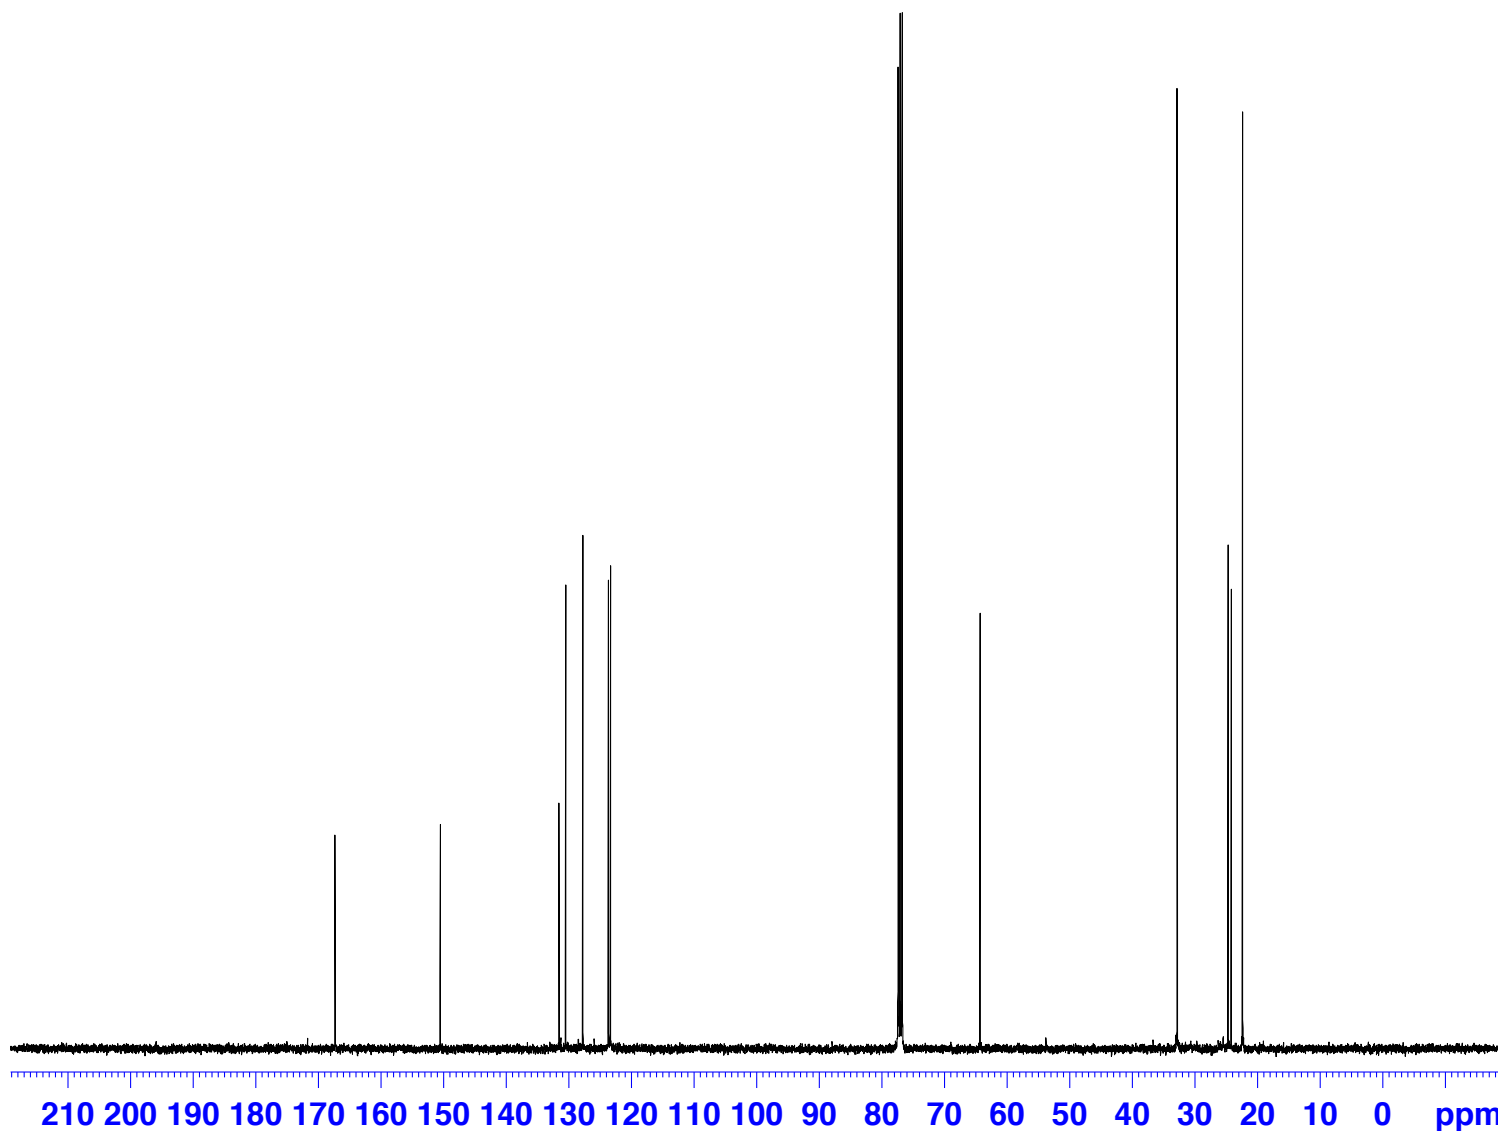

DK-VIII-LW-50c

user: wo...  
team: research-kalyani-wolfel holder: 3  
solvent: CDCl3 expt: PROTON NS=128;SW=20;  
standard 1H experiment ()

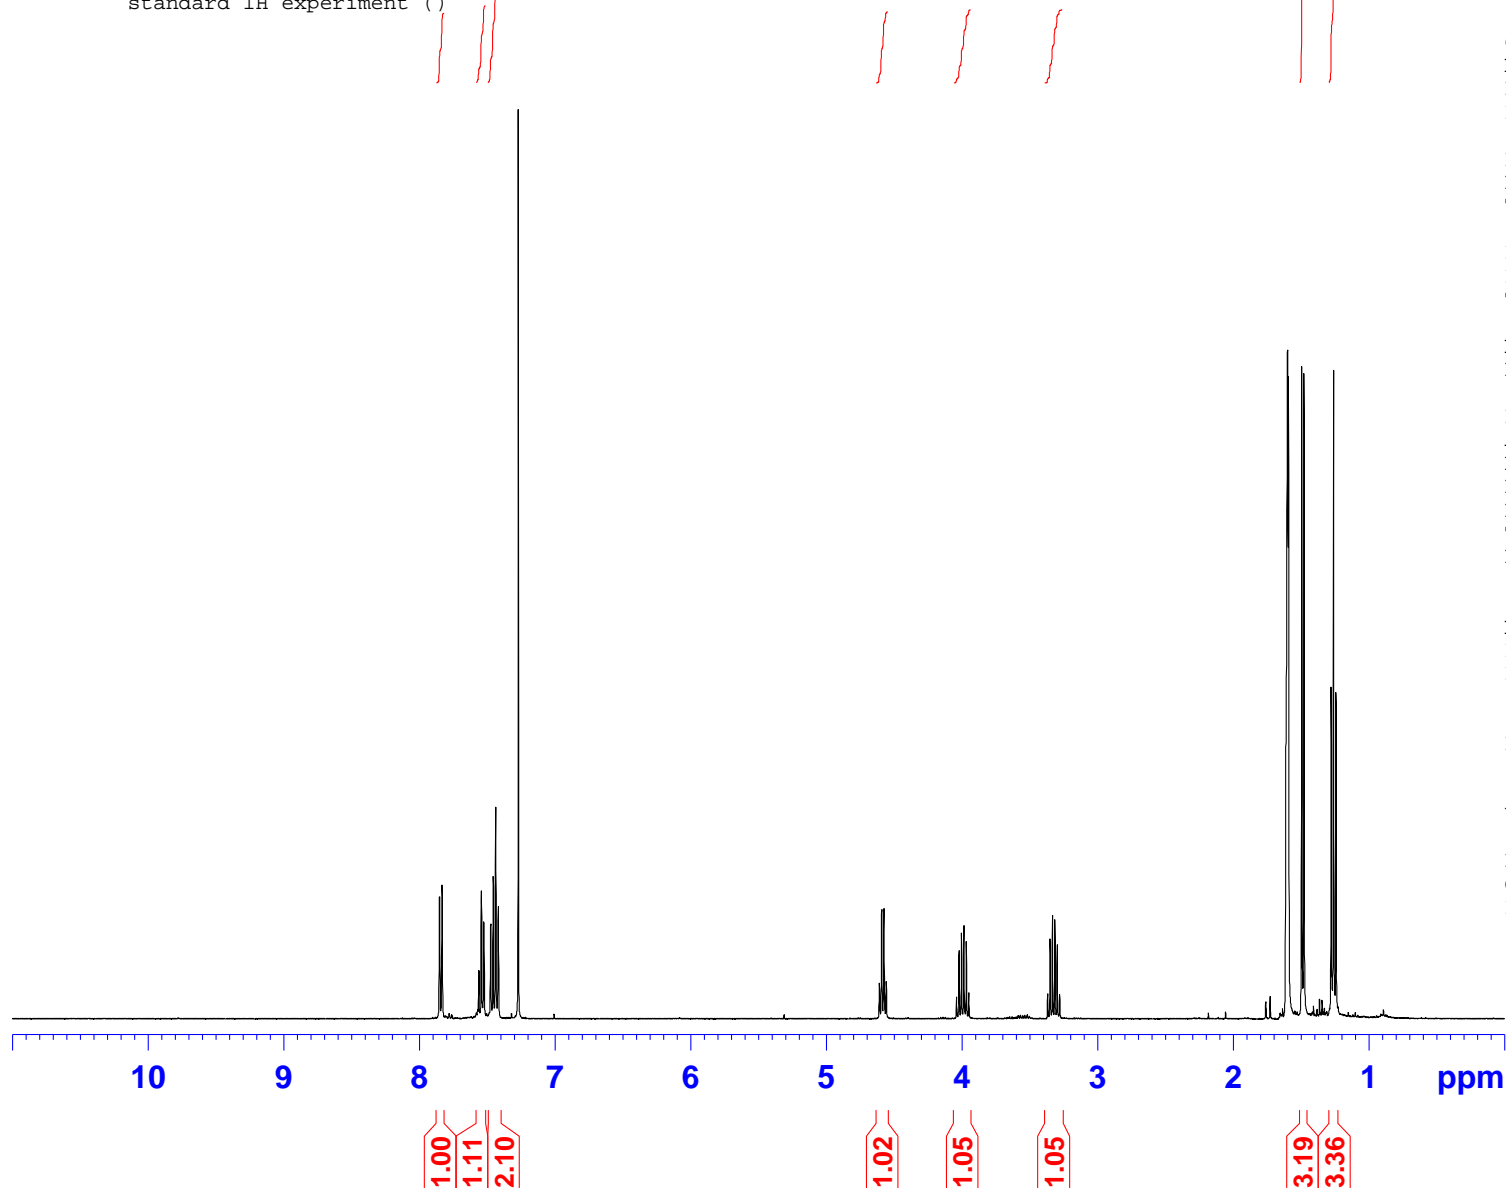

Current Data Parameters  
NAME Jun04-2013  
EXPNO 1469410  
PROCNO 1

F2 - Acquisition Parameters  
Date\_ 20130604  
Time 16.21  
INSTRUM spect  
PROBHD 5 mm BBO 1H/13  
PULPROG zg30  
TD 65536  
SOLVENT CDCl3  
NS 128  
DS 2  
SWH 8012.820 Hz  
FIDRES 0.122266 Hz  
AQ 4.0894966 sec  
RG 724.1  
DW 62.400 usec  
DE 6.00 usec  
TE 300.0 K  
D1 1.00000000 sec

===== CHANNEL f1 =====  
NUC1 1H  
P1 11.75 usec  
PL1 -4.00 dB  
SFO1 400.1324710 MHz

F2 - Processing parameters  
SI 32768  
SF 400.1300000 MHz  
WDW EM  
SSB 0  
LB 0.30 Hz  
GB 0  
PC 1.00

DK-VIII-LW-50 c.2 Concentrated

user: we...  
team: research-kalyani holder: 14  
solvent: CDCl3 expt: C13CPD32 NS=4096;D1=2;  
standard C13 experiment ()

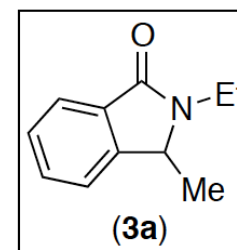

Current Data Parameters  
NAME Jul26-2013  
EXPNO 1570910  
PROCNO 1

F2 - Acquisition Parameters  
Date\_ 20130727  
Time 1.47  
INSTRUM spect  
PROBHD 5 mm BBO 1H/13  
PULPROG zgpg30  
TD 65536  
SOLVENT CDCl3  
NS 4096  
DS 2  
SWH 23980.814 Hz  
FIDRES 0.365918 Hz  
AQ 1.3664756 sec  
RG 6502  
DW 20.850 usec  
DE 6.00 usec  
TE 300.0 K  
D1 2.00000000 sec  
d11 0.03000000 sec  
d12 0.00002000 sec

===== CHANNEL f1 =====  
NUC1 13C  
P1 9.00 usec  
PL1 -4.50 dB  
SFO1 100.6228298 MHz

===== CHANNEL f2 =====  
CPDPRG2 waltz16  
NUC2 1H  
PCPD2 90.00 usec  
PL2 -4.00 dB  
PL12 13.68 dB  
PL13 17.24 dB  
SFO2 400.1316005 MHz

F2 - Processing parameters  
SI 32768  
SF 100.6127690 MHz  
WDW EM

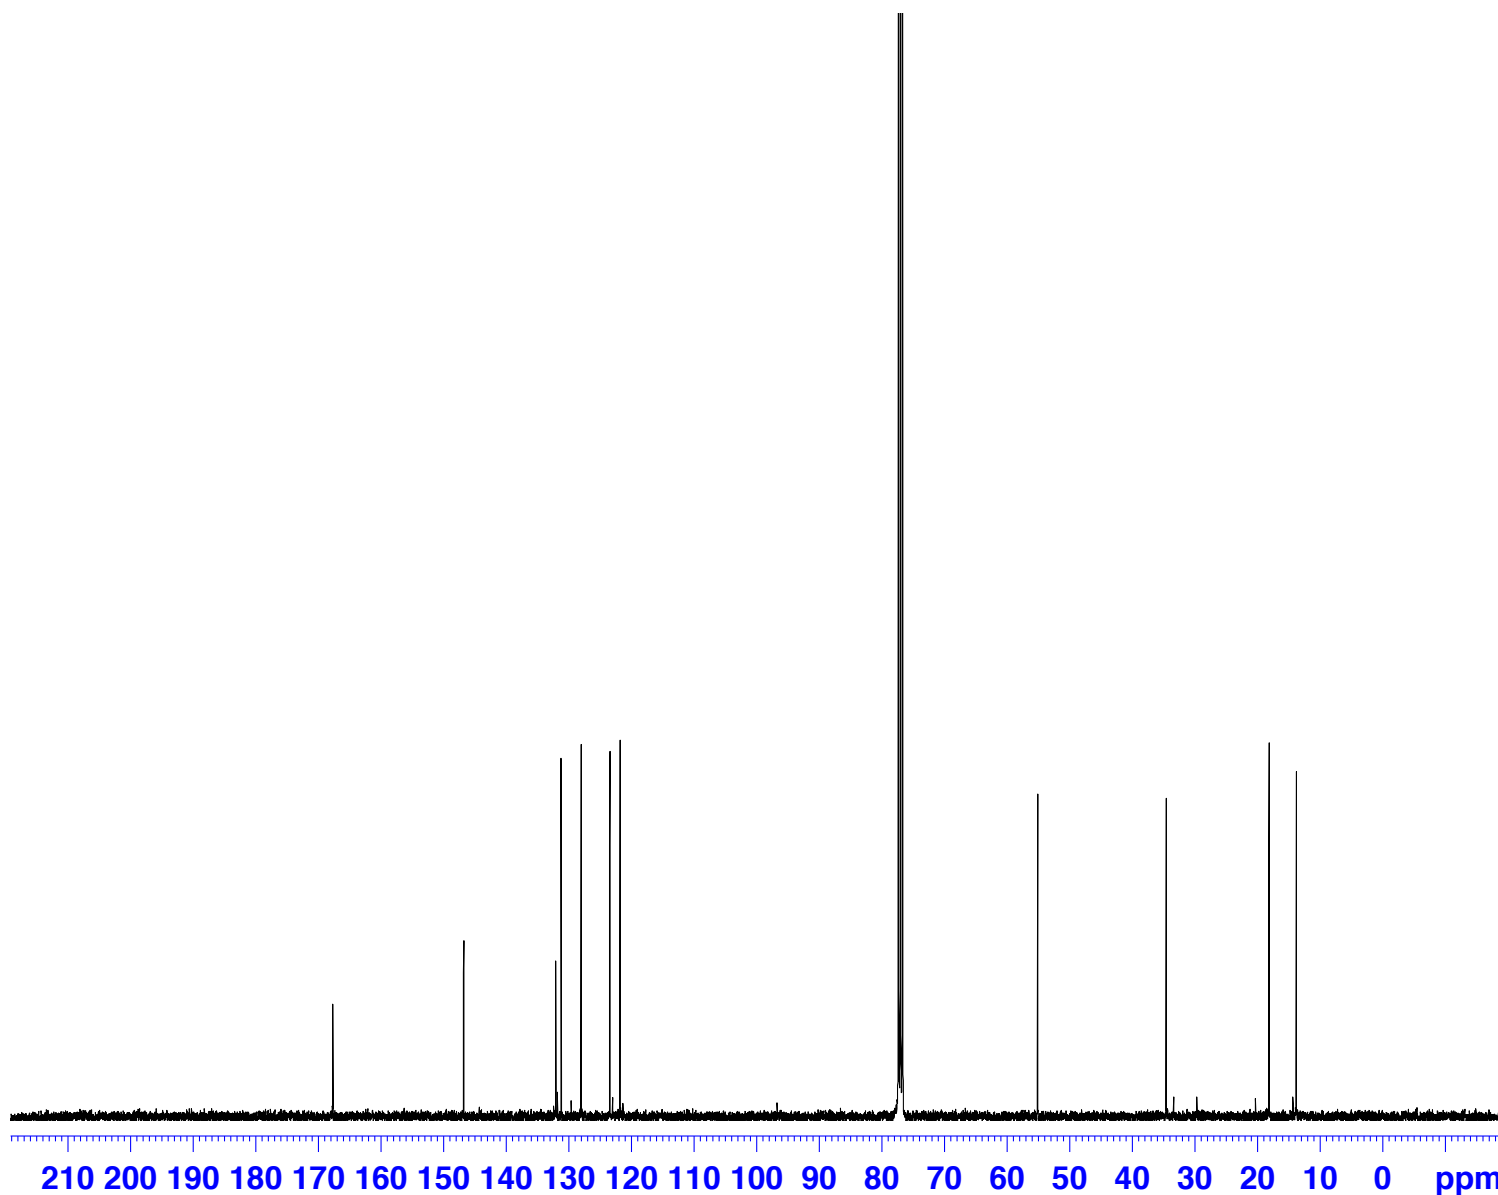

DK-XII-WW-28-1 Concentrated

user: we...  
team: research-kalyani holder: 5  
solvent: CDCl3 expt: PROTON NS=16;SW=20;  
standard 1H experiment ()

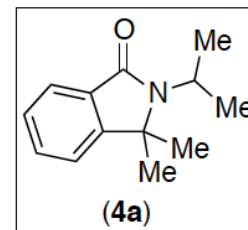

Current Data Parameters  
NAME Jun27-2013  
EXPNO 1512510  
PROCNO 1

F2 - Acquisition Parameters  
Date\_ 20130627  
Time 17.09  
INSTRUM spect  
PROBHD 5 mm BBO 1H/13  
PULPROG zg30  
TD 65536  
SOLVENT CDCl3  
NS 16  
DS 2  
SWH 8012.820 Hz  
FIDRES 0.122266 Hz  
AQ 4.0894966 sec  
RG 35.9  
DW 62.400 usec  
DE 6.00 usec  
TE 300.0 K  
D1 1.00000000 sec

===== CHANNEL f1 =====  
NUC1 1H  
P1 11.75 usec  
PL1 -4.00 dB  
SFO1 400.1324710 MHz

F2 - Processing parameters  
SI 32768  
SF 400.1300000 MHz  
WDW EM  
SSB 0  
LB 0.30 Hz  
GB 0  
PC 1.00

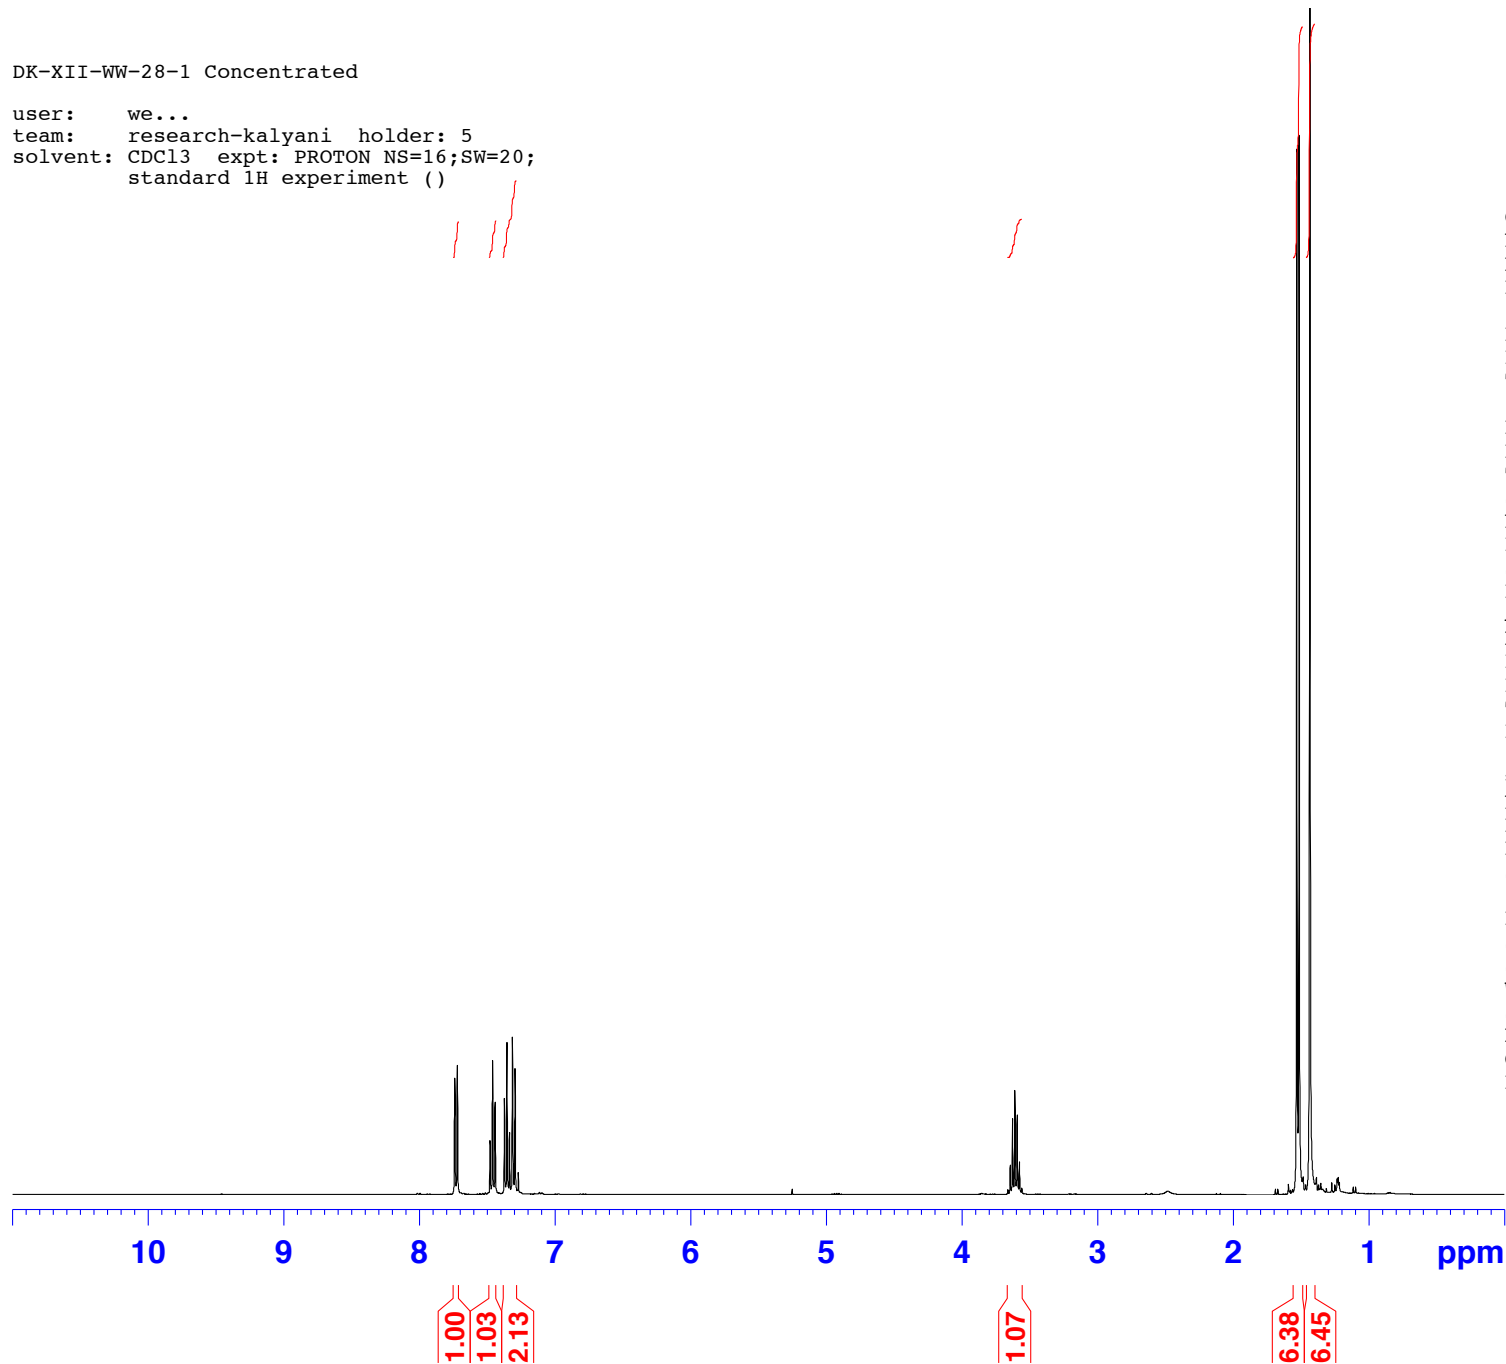



DK-XII-WW-28-1 Concentrated

user: we...  
team: research-kalyani holder: 5  
solvent: CDCl3 expt: C13CPD32 NS=2048;D1=2;  
standard C13 experiment ()

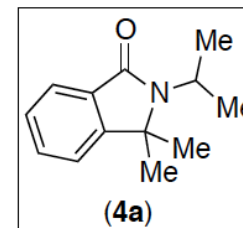

Current Data Parameters  
NAME Jun27-2013  
EXPNO 1512610  
PROCNO 1

F2 - Acquisition Parameters  
Date\_ 20130627  
Time 19.05  
INSTRUM spect  
PROBHD 5 mm BBO 1H/13  
PULPROG zgpg30  
TD 65536  
SOLVENT CDCl3  
NS 2048  
DS 2  
SWH 23980.814 Hz  
FIDRES 0.365918 Hz  
AQ 1.3664756 sec  
RG 3251  
DW 20.850 usec  
DE 6.00 usec  
TE 300.0 K  
D1 2.00000000 sec  
d11 0.03000000 sec  
d12 0.00002000 sec

===== CHANNEL f1 =====  
NUC1 13C  
P1 9.00 usec  
PL1 -4.50 dB  
SFO1 100.6228298 MHz

===== CHANNEL f2 =====  
CPDPRG2 waltz16  
NUC2 1H  
PCPD2 90.00 usec  
PL2 -4.00 dB  
PL12 13.68 dB  
PL13 17.24 dB  
SFO2 400.1316005 MHz

F2 - Processing parameters  
SI 32768  
SF 100.6127690 MHz  
WDW EM

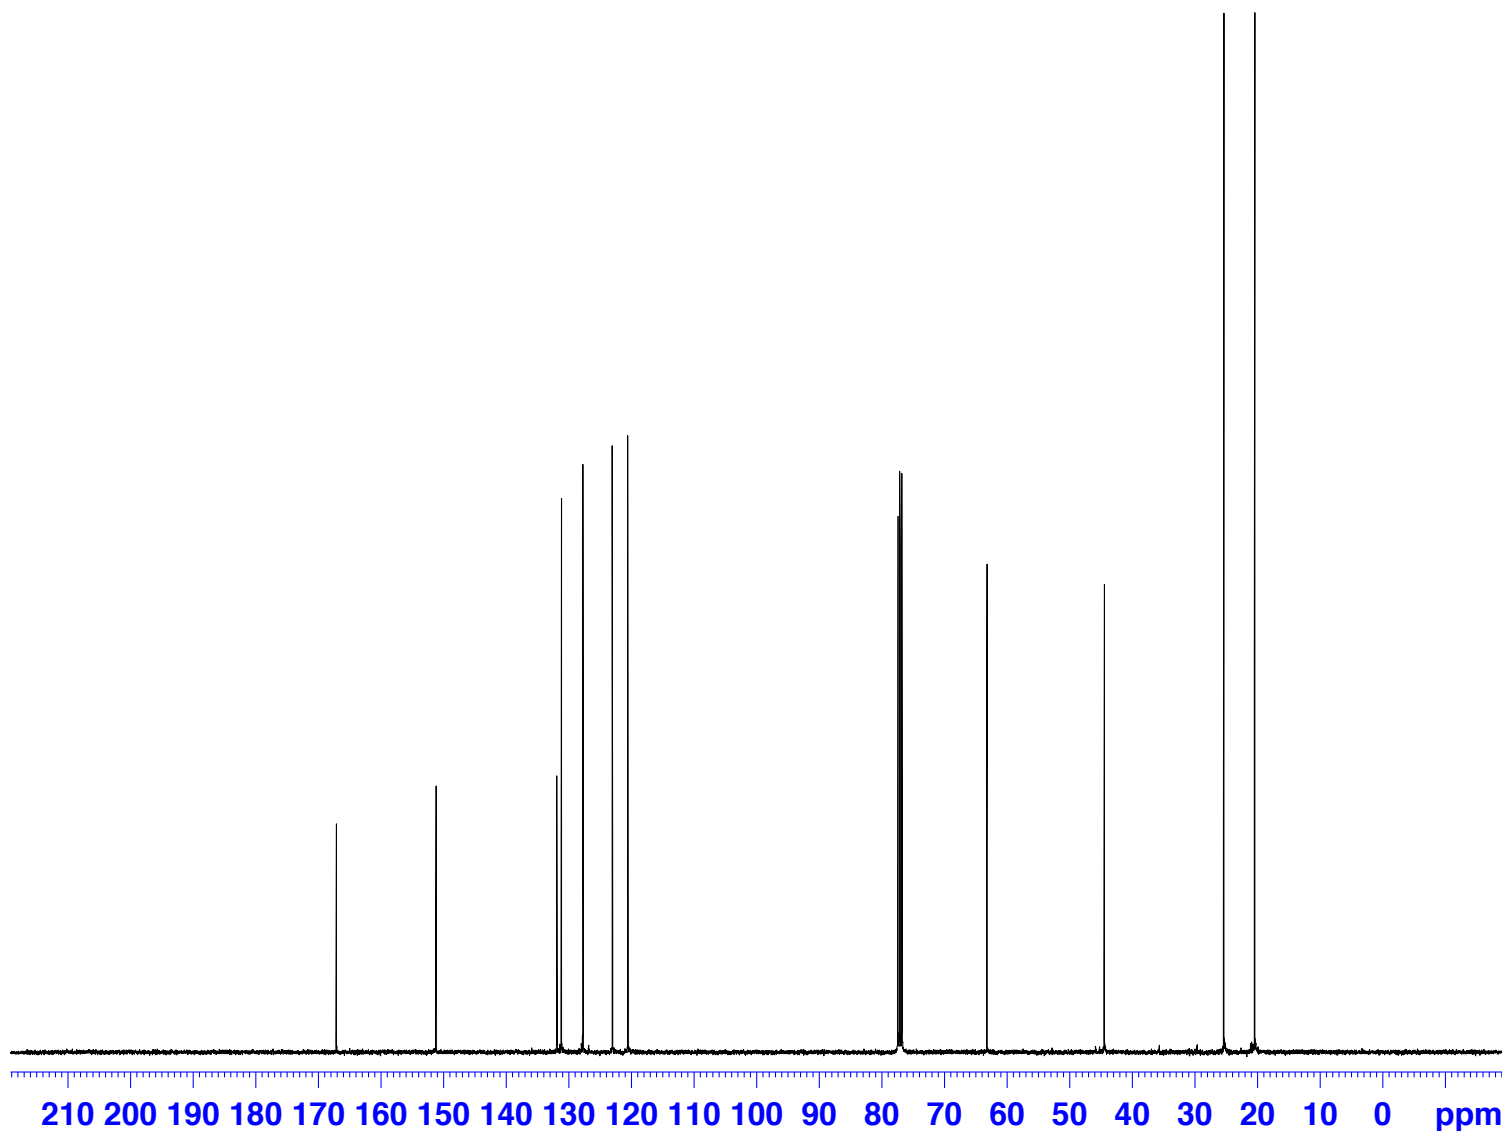

DK-XII-WW-28-2 Concentrated Redo

user: we...  
team: research-kalyani-wertjes holder: 10  
solvent: CDCl3 expt: PROTON NS=16;SW=20;  
standard 1H experiment ()

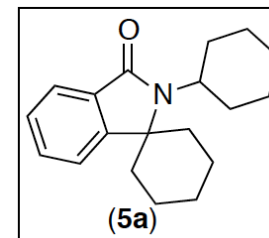

Current Data Parameters  
NAME Jun28-2013  
EXPNO 1515710  
PROCNO 1

F2 - Acquisition Parameters  
Date\_ 20130628  
Time 23.21  
INSTRUM spect  
PROBHD 5 mm BBO 1H/13  
PULPROG zg30  
TD 65536  
SOLVENT CDCl3  
NS 16  
DS 2  
SWH 8012.820 Hz  
FIDRES 0.122266 Hz  
AQ 4.0894966 sec  
RG 25.4  
DW 62.400 usec  
DE 6.00 usec  
TE 300.0 K  
D1 1.00000000 sec

===== CHANNEL f1 =====  
NUC1 1H  
P1 11.75 usec  
PL1 -4.00 dB  
SFO1 400.1324710 MHz

F2 - Processing parameters  
SI 32768  
SF 400.1300000 MHz  
WDW EM  
SSB 0  
LB 0.30 Hz  
GB 0  
PC 1.00

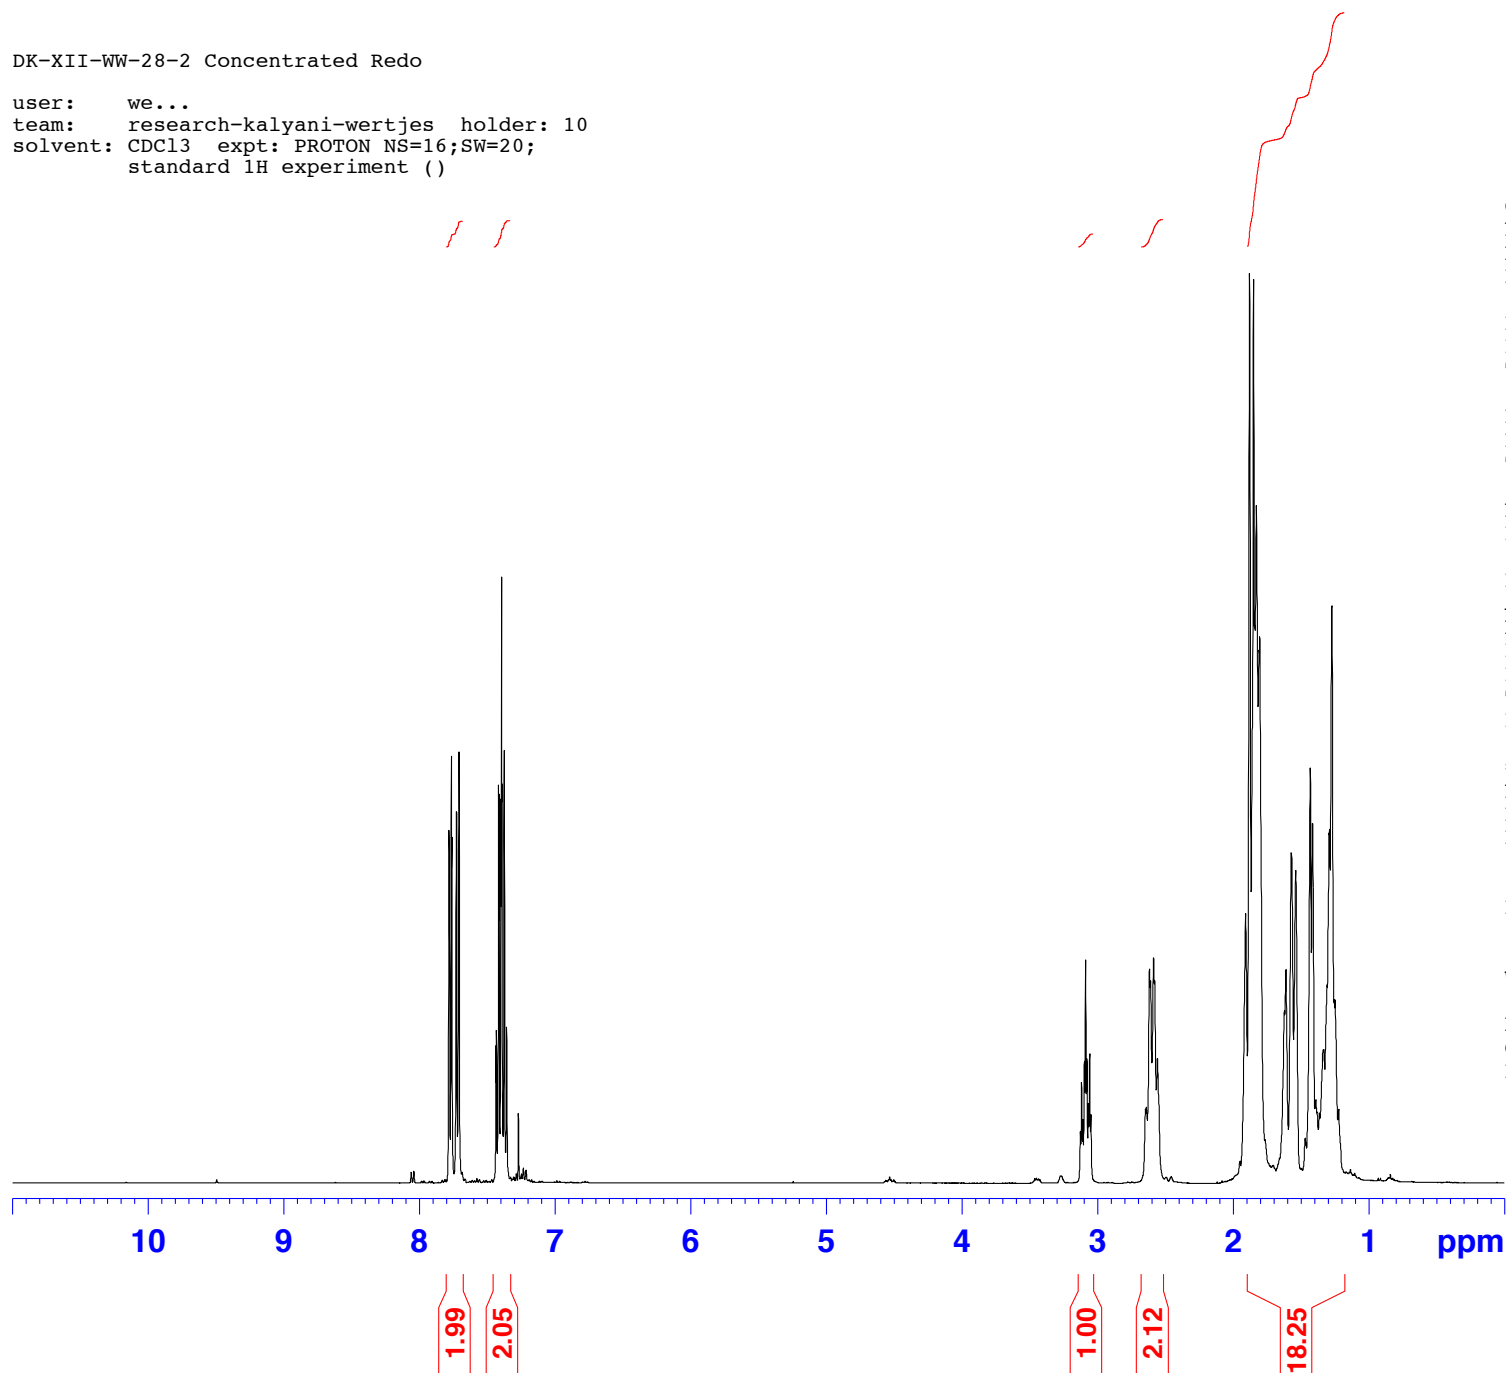

DK-XII-WW-28-2 Concentrated

user: we...  
team: research-kalyani holder: 6  
solvent: CDCl3 expt: C13CPD32 NS=2048;D1=2;  
standard C13 experiment ()

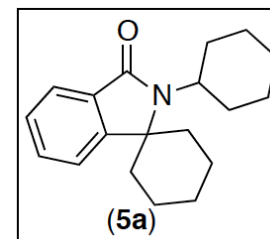

Current Data Parameters  
NAME Jun27-2013  
EXPNO 1512810  
PROCNO 1

F2 - Acquisition Parameters  
Date\_ 20130627  
Time 21.07  
INSTRUM spect  
PROBHD 5 mm BBO 1H/13  
PULPROG zgpg30  
TD 65536  
SOLVENT CDCl3  
NS 2048  
DS 2  
SWH 23980.814 Hz  
FIDRES 0.365918 Hz  
AQ 1.3664756 sec  
RG 3251  
DW 20.850 usec  
DE 6.00 usec  
TE 300.0 K  
D1 2.00000000 sec  
d11 0.03000000 sec  
d12 0.00002000 sec

===== CHANNEL f1 =====  
NUC1 13C  
P1 9.00 usec  
PL1 -4.50 dB  
SFO1 100.6228298 MHz

===== CHANNEL f2 =====  
CPDPRG2 waltz16  
NUC2 1H  
PCPD2 90.00 usec  
PL2 -4.00 dB  
PL12 13.68 dB  
PL13 17.24 dB  
SFO2 400.1316005 MHz

F2 - Processing parameters  
SI 32768  
SF 100.6127690 MHz  
WDW EM

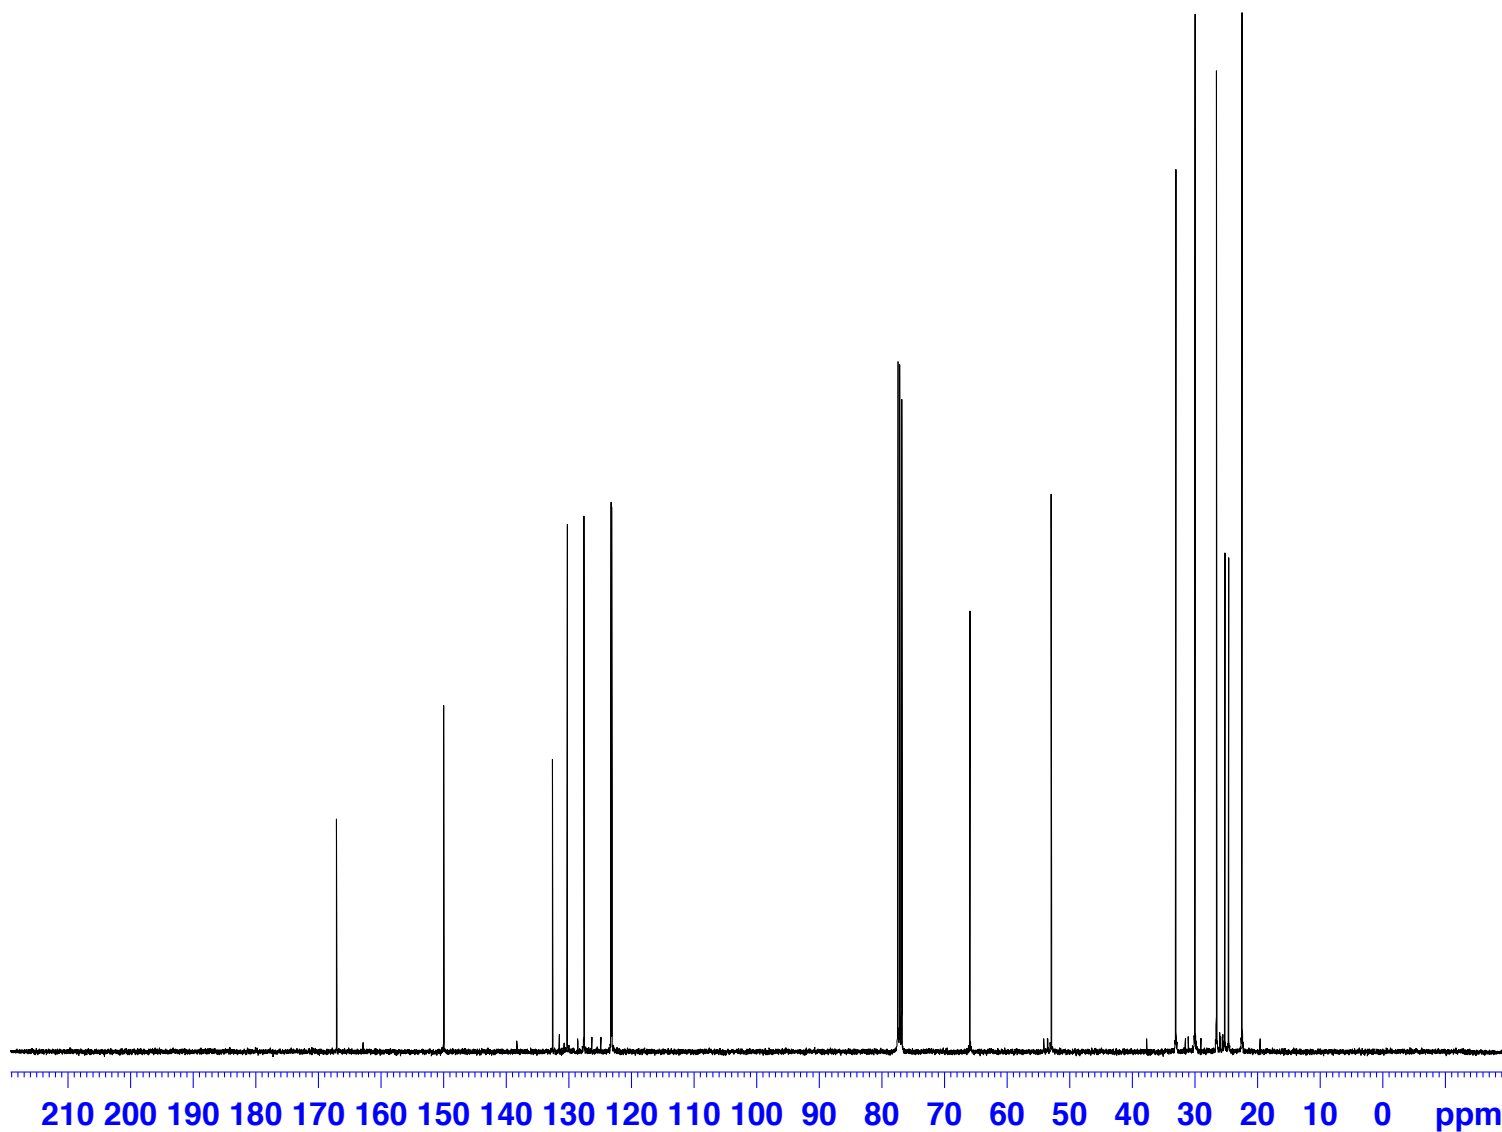

DK-VIII-LW-75 Concentrated

user: we...  
team: research-kalyani holder: 9  
solvent: CDCl3 expt: PROTON NS=16;SW=20;  
standard 1H experiment ()

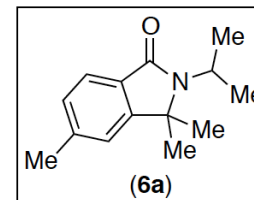

Current Data Parameters  
NAME Jun27-2013  
EXPNO 1513310  
PROCNO 1

F2 - Acquisition Parameters  
Date\_ 20130628  
Time 1.16  
INSTRUM spect  
PROBHD 5 mm BBO 1H/13  
PULPROG zg30  
TD 65536  
SOLVENT CDCl3  
NS 16  
DS 2  
SWH 8012.820 Hz  
FIDRES 0.122266 Hz  
AQ 4.0894966 sec  
RG 40.3  
DW 62.400 usec  
DE 6.00 usec  
TE 300.0 K  
D1 1.00000000 sec

===== CHANNEL f1 =====  
NUC1 1H  
P1 11.75 usec  
PL1 -4.00 dB  
SFO1 400.1324710 MHz

F2 - Processing parameters  
SI 32768  
SF 400.1300000 MHz  
WDW EM  
SSB 0  
LB 0.30 Hz  
GB 0  
PC 1.00

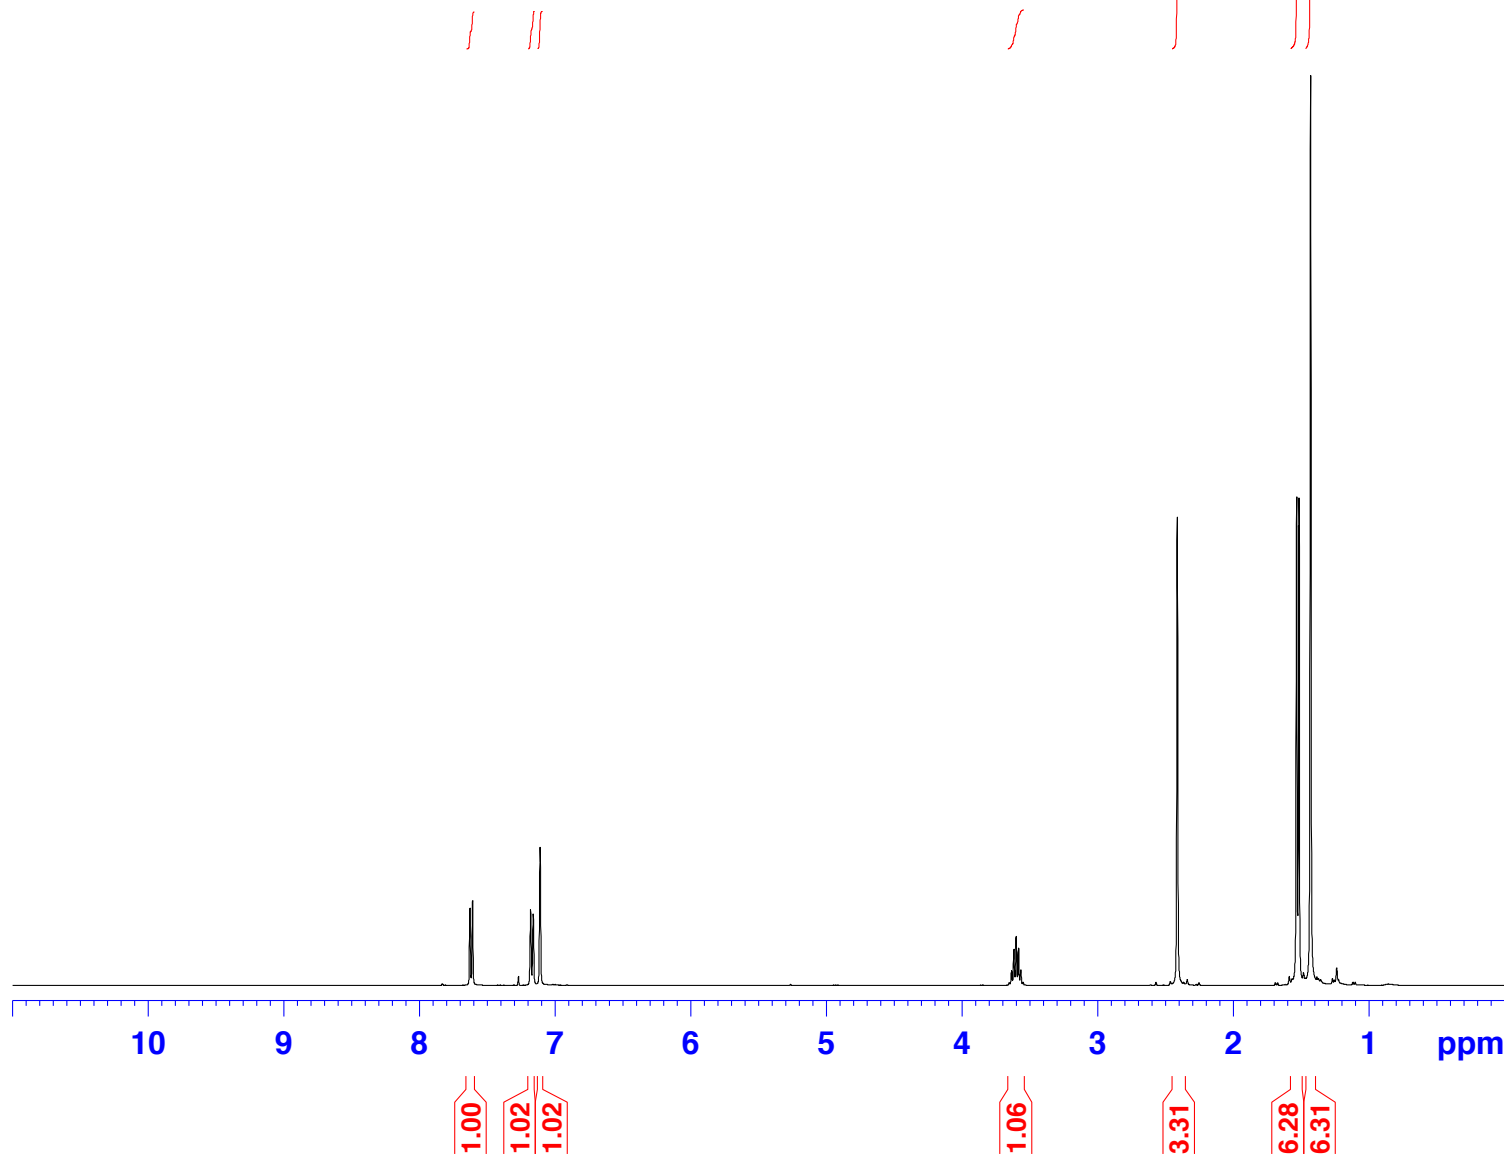

DK-VIII-LW-75 Concentrated

user: we...  
 team: research-kalyani holder: 9  
 solvent: CDCl3 expt: C13CPD32 NS=2048;D1=2;  
 standard C13 experiment ()

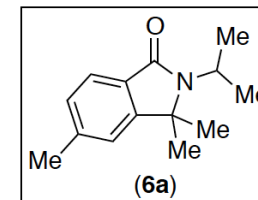

Current Data Parameters  
 NAME Jun27-2013  
 EXPNO 1513410  
 PROCNO 1

F2 - Acquisition Parameters  
 Date\_ 20130628  
 Time 3.21  
 INSTRUM spect  
 PROBHD 5 mm BBO 1H/13  
 PULPROG zgpg30  
 TD 65536  
 SOLVENT CDCl3  
 NS 2048  
 DS 2  
 SWH 23980.814 Hz  
 FIDRES 0.365918 Hz  
 AQ 1.3664756 sec  
 RG 2580.3  
 DW 20.850 usec  
 DE 6.00 usec  
 TE 300.0 K  
 D1 2.00000000 sec  
 d11 0.03000000 sec  
 d12 0.00002000 sec

===== CHANNEL f1 =====  
 NUC1 13C  
 P1 9.00 usec  
 PL1 -4.50 dB  
 SFO1 100.6228298 MHz

===== CHANNEL f2 =====  
 CPDPRG2 waltz16  
 NUC2 1H  
 PCPD2 90.00 usec  
 PL2 -4.00 dB  
 PL12 13.68 dB  
 PL13 17.24 dB  
 SFO2 400.1316005 MHz

F2 - Processing parameters  
 SI 32768  
 SF 100.6127690 MHz  
 WDW EM

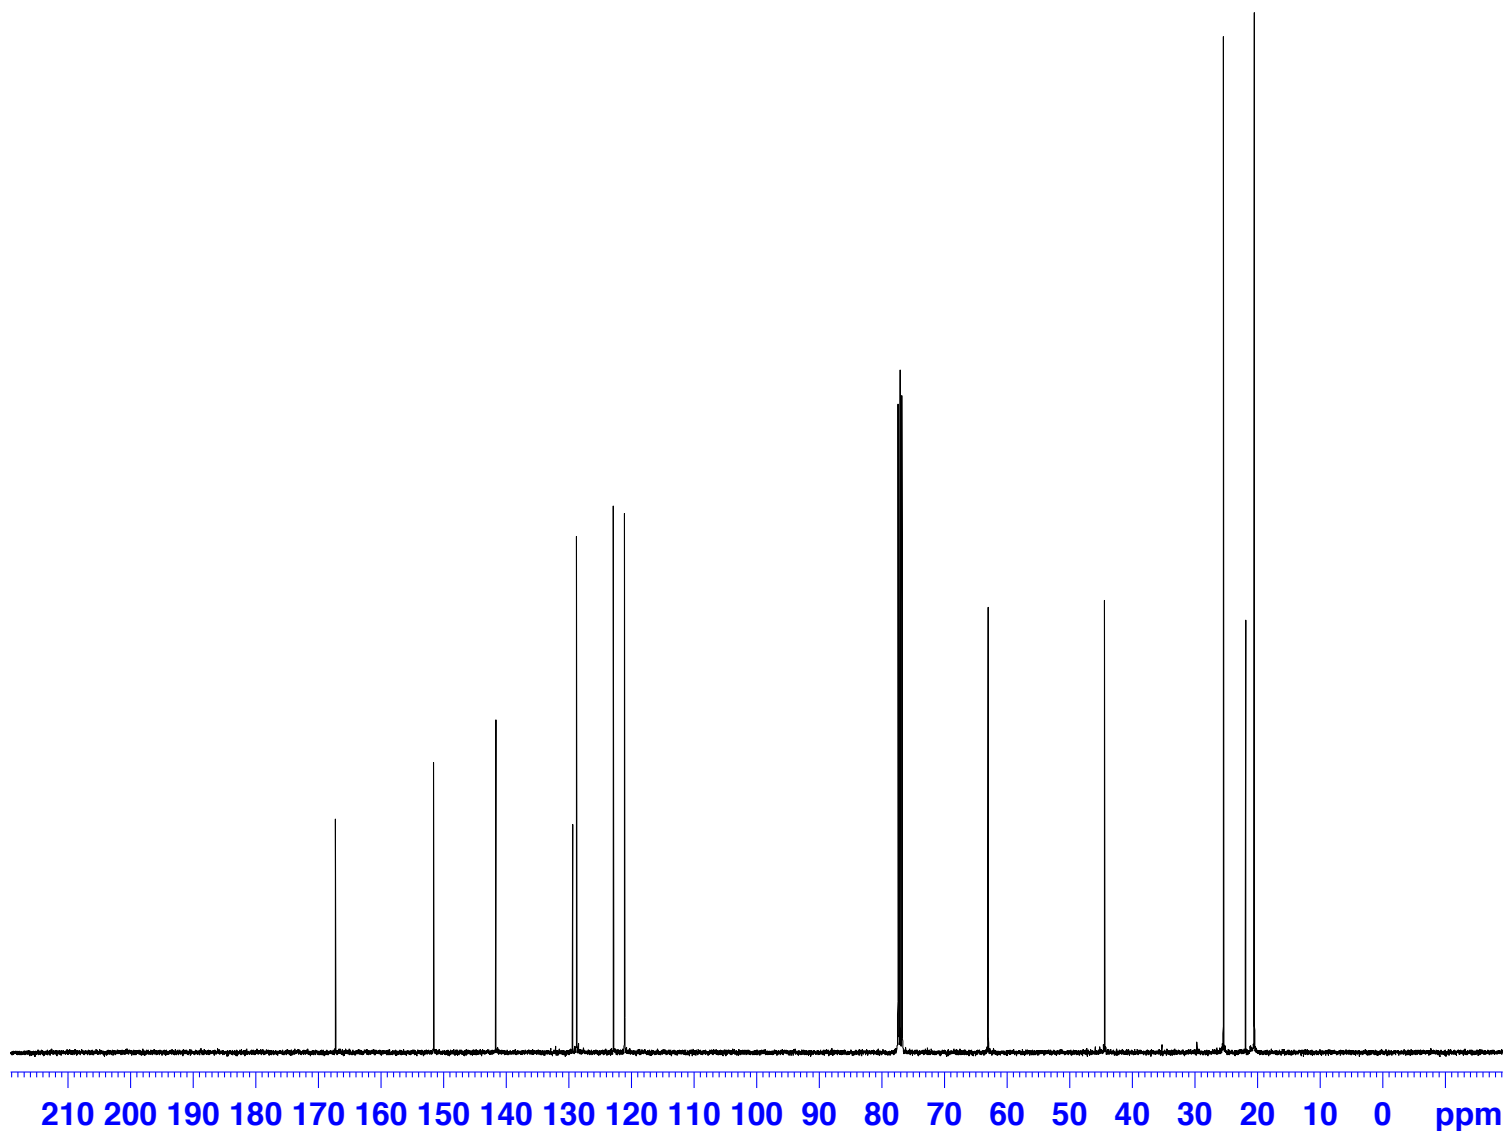

DK-XII-WW-71 Fr. 51-61 Small Scale

user: we...  
team: research-kalyani holder: 10  
solvent: CDCl3 expt: PROTON NS=64;SW=20;  
standard 1H experiment ()

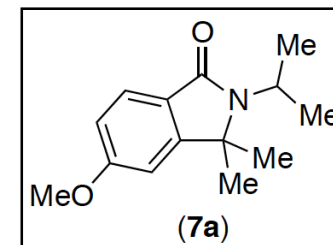

Current Data Parameters  
NAME Jul04-2013  
EXPNO 1525810  
PROCNO 1

F2 - Acquisition Parameters  
Date\_ 20130704  
Time 14.24  
INSTRUM spect  
PROBHD 5 mm BBO 1H/13  
PULPROG zg30  
TD 65536  
SOLVENT CDCl3  
NS 64  
DS 2  
SWH 8012.820 Hz  
FIDRES 0.122266 Hz  
AQ 4.0894966 sec  
RG 724.1  
DW 62.400 usec  
DE 6.00 usec  
TE 300.0 K  
D1 1.00000000 sec

===== CHANNEL f1 =====  
NUC1 1H  
P1 11.75 usec  
PL1 -4.00 dB  
SFO1 400.1324710 MHz

F2 - Processing parameters  
SI 32768  
SF 400.1300000 MHz  
WDW EM  
SSB 0  
LB 0.30 Hz  
GB 0  
PC 1.00

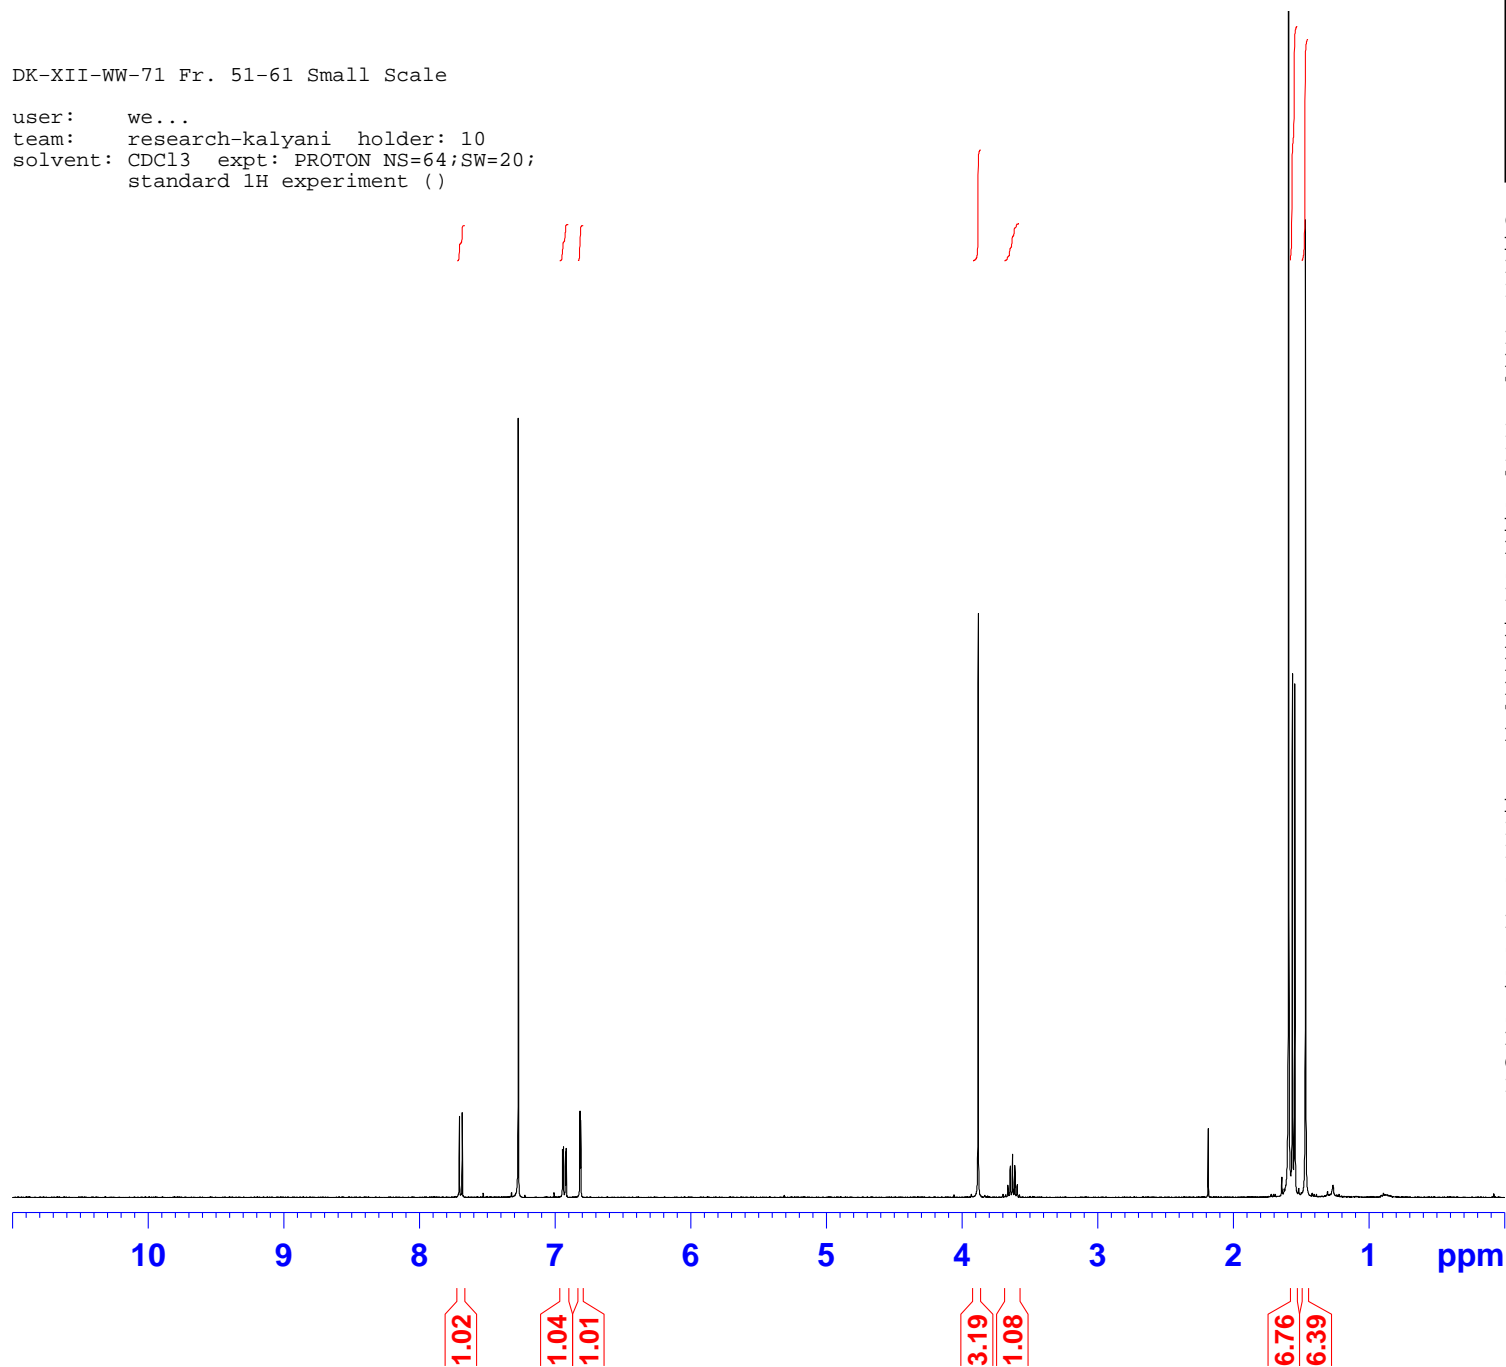

DK-XII-WW-71 Fr. 51-61 Concentrated

user: we...  
team: research-kalyani holder: 10  
solvent: CDCl<sub>3</sub> expt: C13CPD32 NS=4096;D1=2;  
standard C13 experiment ()

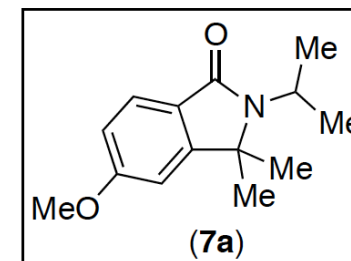

Current Data Parameters  
NAME Jul04-2013  
EXPNO 1526910  
PROCNO 1

F2 - Acquisition Parameters  
Date\_ 20130704  
Time 21.33  
INSTRUM spect  
PROBHD 5 mm BBO 1H/13  
PULPROG zgpg30  
TD 65536  
SOLVENT CDCl<sub>3</sub>  
NS 4096  
DS 2  
SWH 23980.814 Hz  
FIDRES 0.365918 Hz  
AQ 1.3664756 sec  
RG 1625.5  
DW 20.850 usec  
DE 6.00 usec  
TE 300.0 K  
D1 2.00000000 sec  
d11 0.03000000 sec  
d12 0.00002000 sec

===== CHANNEL f1 =====  
NUC1 13C  
P1 9.00 usec  
PL1 -4.50 dB  
SFO1 100.6228298 MHz

===== CHANNEL f2 =====  
CPDPRG2 waltz16  
NUC2 1H  
PCPD2 90.00 usec  
PL2 -4.00 dB  
PL12 13.68 dB  
PL13 17.24 dB  
SFO2 400.1316005 MHz

F2 - Processing parameters  
SI 32768  
SF 100.6127690 MHz  
WDW EM

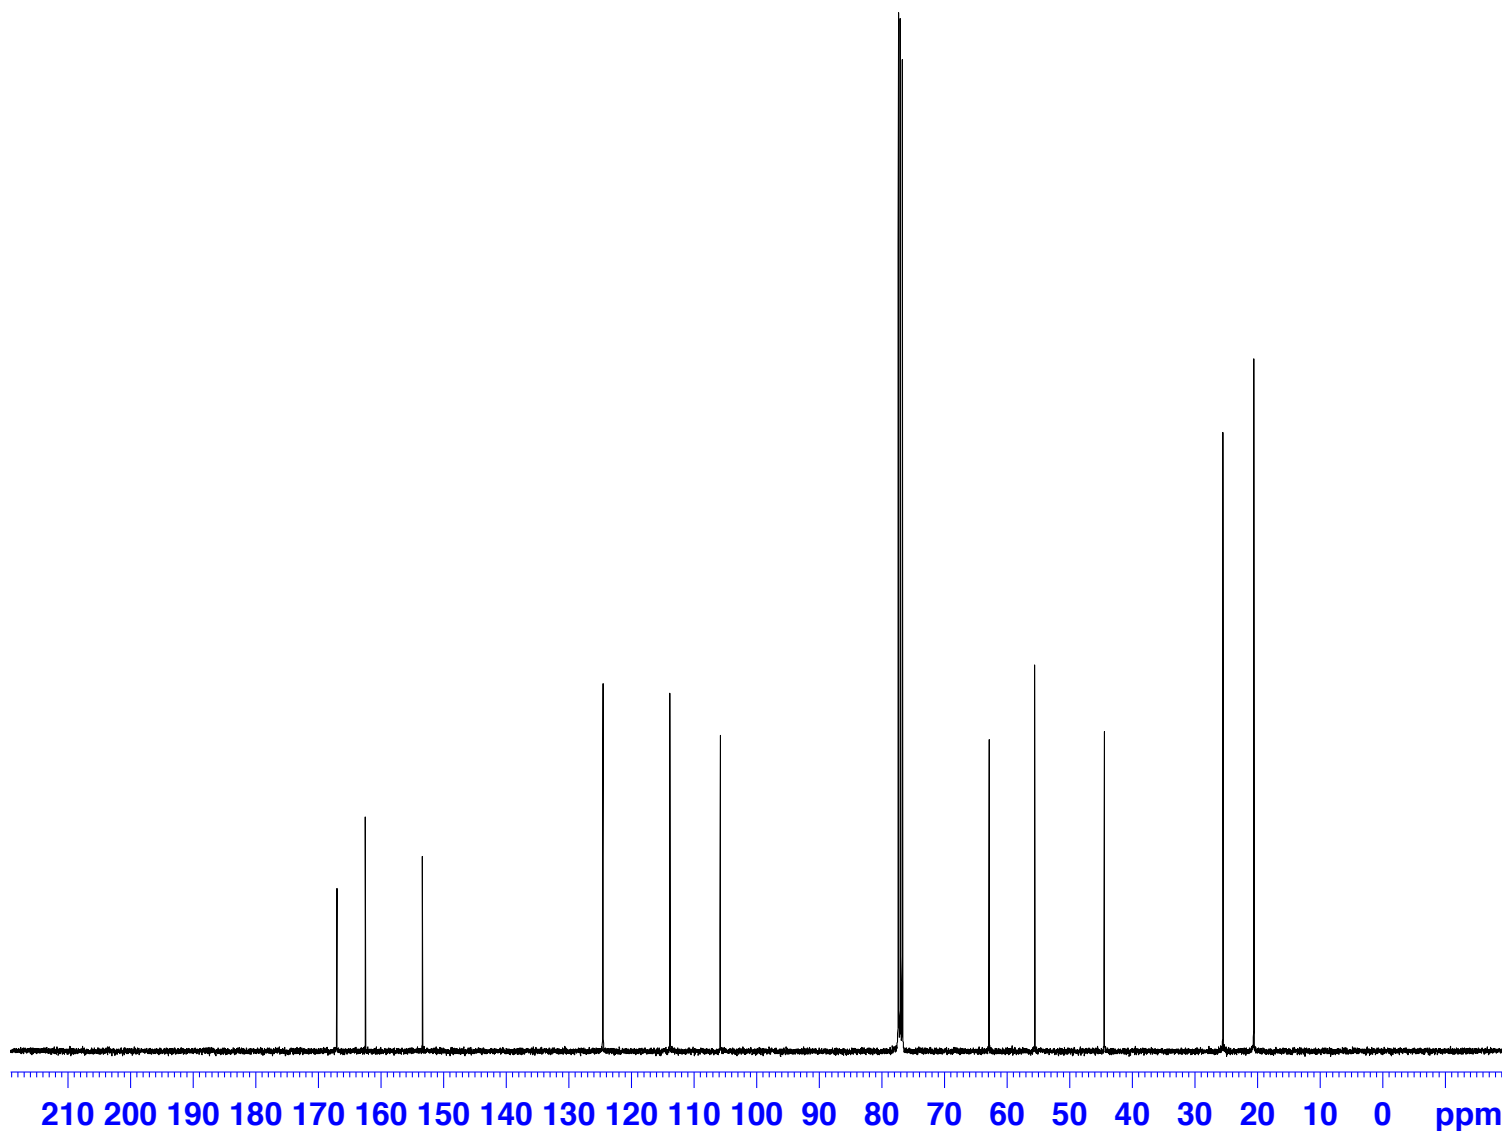

DK-XII-WW-77 Fr. 43-52 Concentrated

user: we...  
team: research-kalyani holder: 6  
solvent: CDCl3 expt: PROTON NS=16;SW=20;  
standard 1H experiment ()

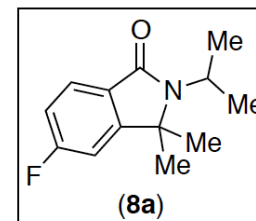

Current Data Parameters  
NAME Jul04-2013  
EXPNO 1527410  
PROCNO 1

F2 - Acquisition Parameters  
Date\_ 20130705  
Time 5.33  
INSTRUM spect  
PROBHD 5 mm BBO 1H/13  
PULPROG zg30  
TD 65536  
SOLVENT CDCl3  
NS 16  
DS 2  
SWH 8012.820 Hz  
FIDRES 0.122266 Hz  
AQ 4.0894966 sec  
RG 128  
DW 62.400 usec  
DE 6.00 usec  
TE 300.0 K  
D1 1.00000000 sec

===== CHANNEL f1 =====  
NUC1 1H  
P1 11.75 usec  
PL1 -4.00 dB  
SFO1 400.1324710 MHz

F2 - Processing parameters  
SI 32768  
SF 400.1300000 MHz  
WDW EM  
SSB 0  
LB 0.30 Hz  
GB 0  
PC 1.00

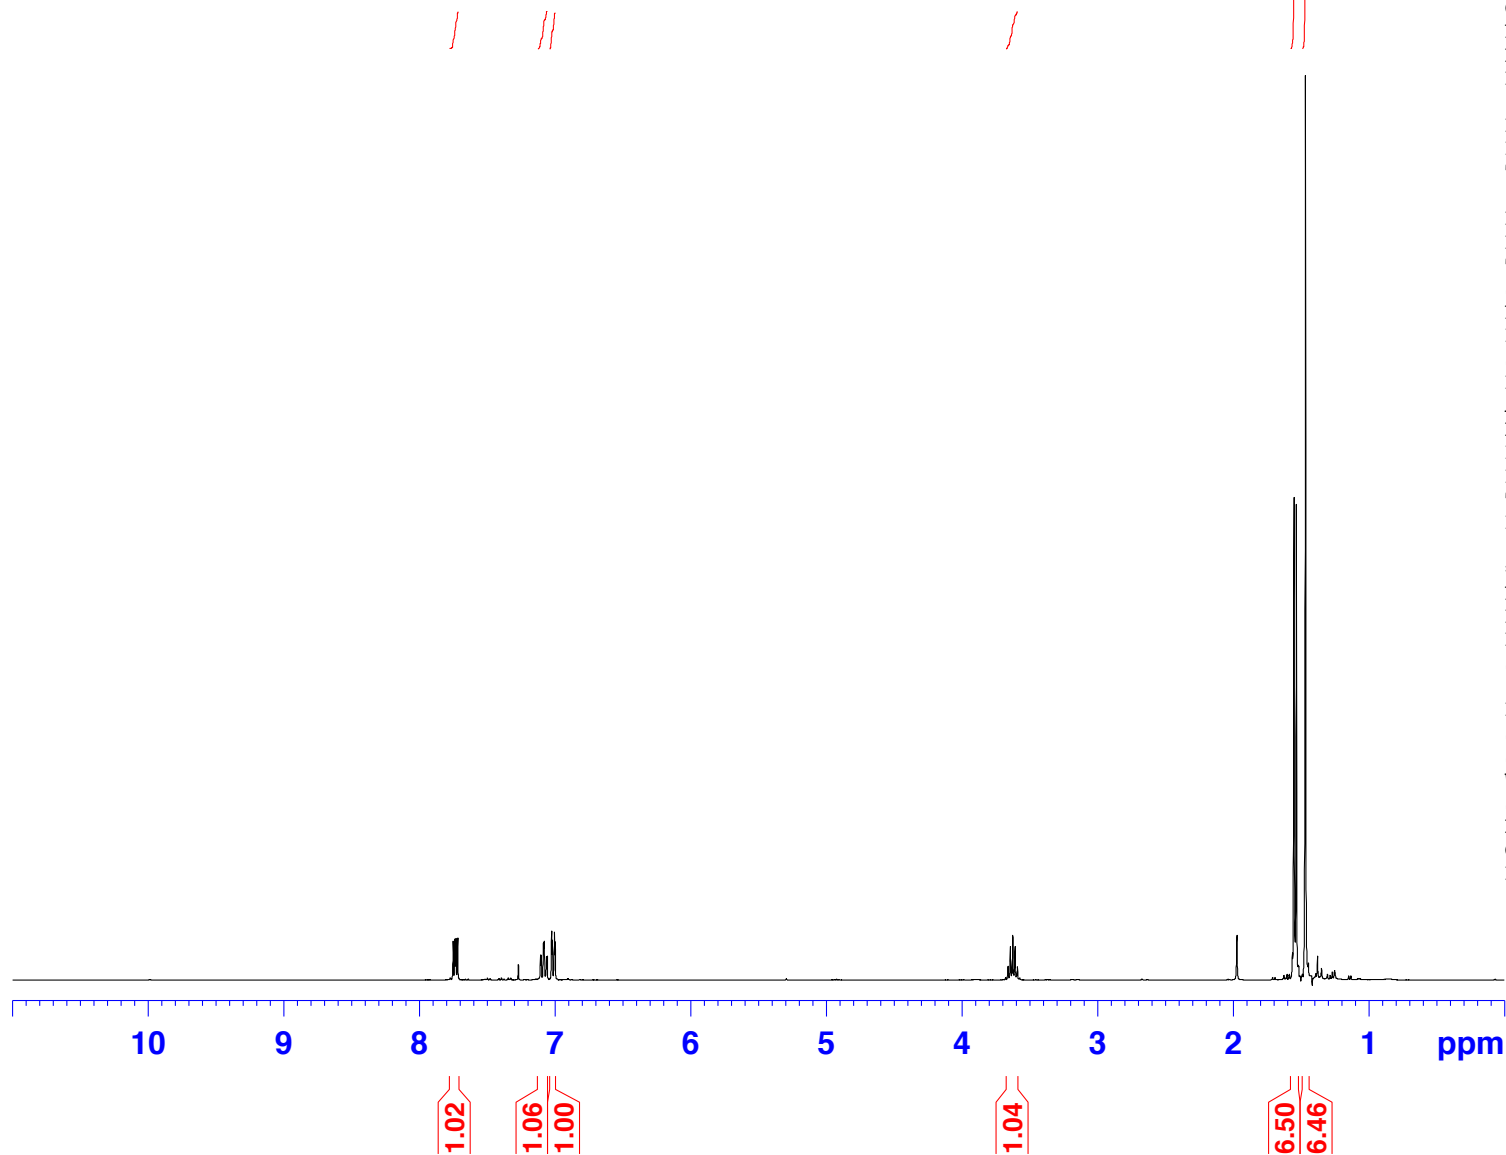



DK-XII-WW-77 Fr. 43-52 Concentrated

user: we...  
team: research-kalyani holder: 6  
solvent: CDCl<sub>3</sub> expt: C13CPD32 NS=4096;D1=2;  
standard C13 experiment ()

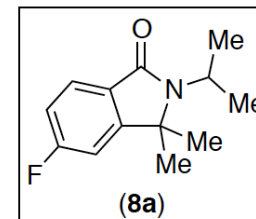

Current Data Parameters  
NAME Jul04-2013  
EXPNO 1527510  
PROCNO 1

F2 - Acquisition Parameters  
Date\_ 20130705  
Time 9.24  
INSTRUM spect  
PROBHD 5 mm BBO 1H/13  
PULPROG zgpg30  
TD 65536  
SOLVENT CDCl<sub>3</sub>  
NS 4096  
DS 2  
SWH 23980.814 Hz  
FIDRES 0.365918 Hz  
AQ 1.3664756 sec  
RG 2298.8  
DW 20.850 usec  
DE 6.00 usec  
TE 300.0 K  
D1 2.00000000 sec  
d11 0.03000000 sec  
d12 0.00002000 sec

===== CHANNEL f1 =====  
NUC1 13C  
P1 9.00 usec  
PL1 -4.50 dB  
SFO1 100.6228298 MHz

===== CHANNEL f2 =====  
CPDPRG2 waltz16  
NUC2 1H  
PCPD2 90.00 usec  
PL2 -4.00 dB  
PL12 13.68 dB  
PL13 17.24 dB  
SFO2 400.1316005 MHz

F2 - Processing parameters  
SI 32768  
SF 100.6127690 MHz  
WDW EM

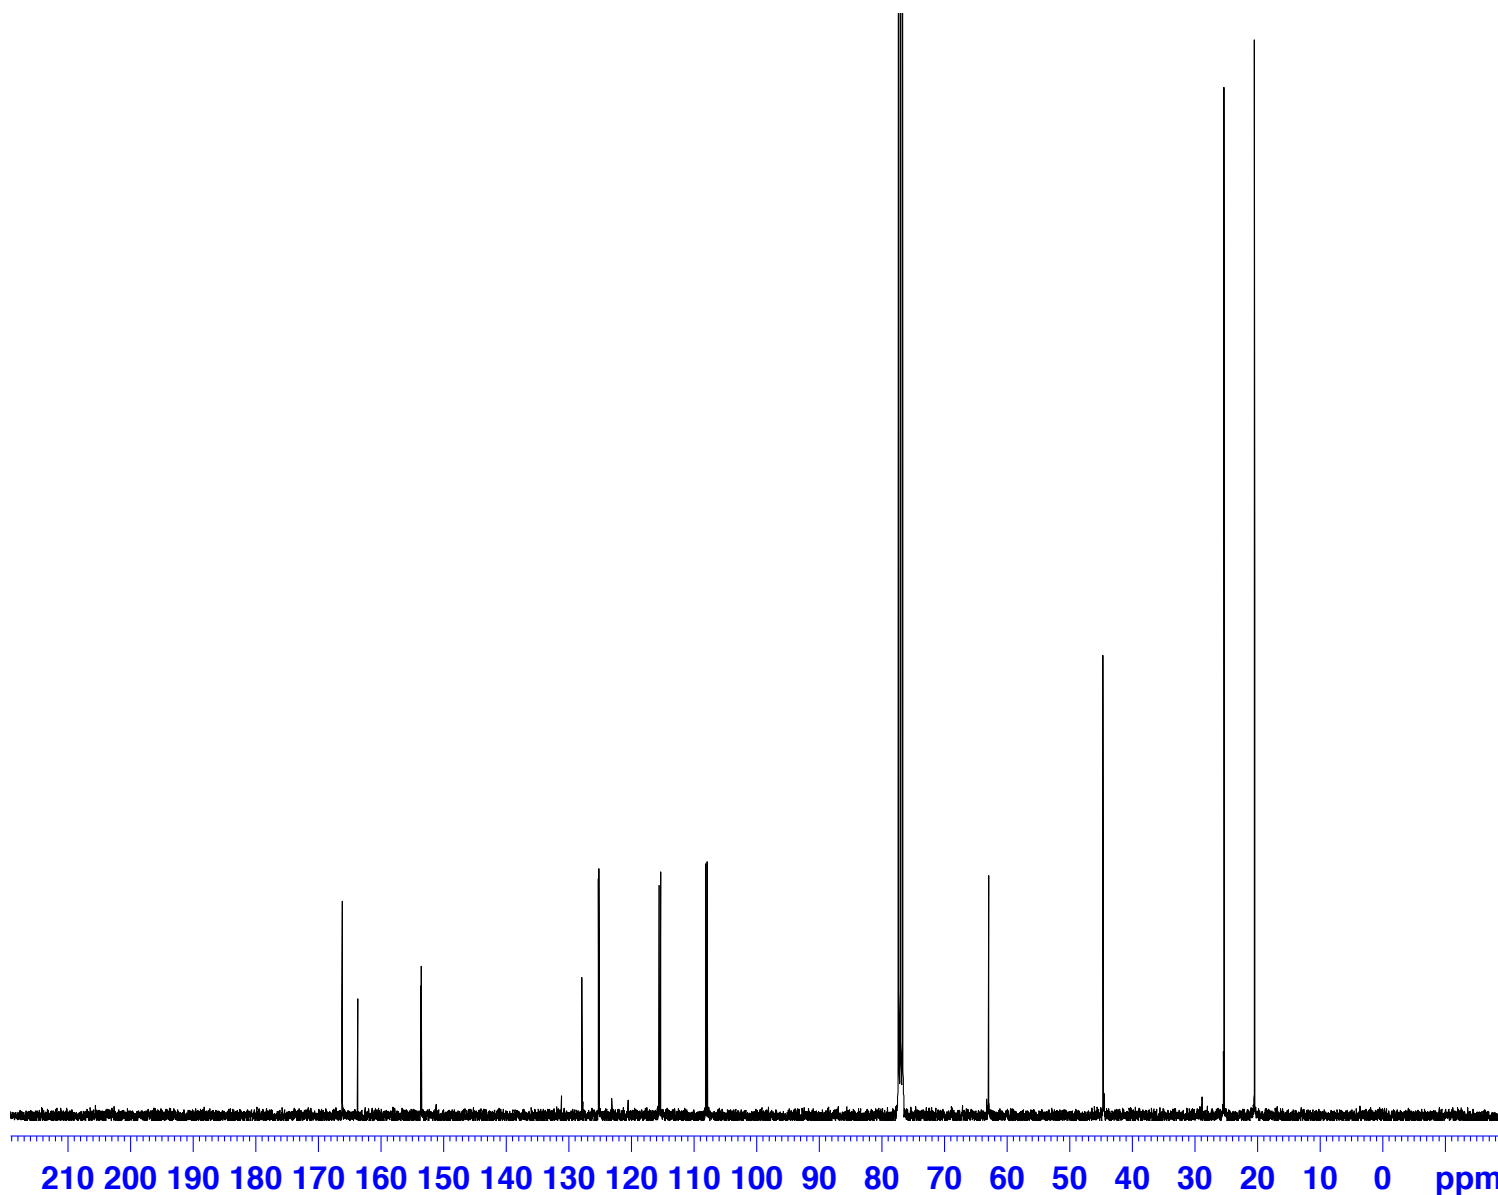

DK-XII-WW-76 Concentrated

user: we...  
team: research-kalyani holder: 6  
solvent: CDCl3 expt: PROTON NS=16;SW=20;  
standard 1H experiment ()

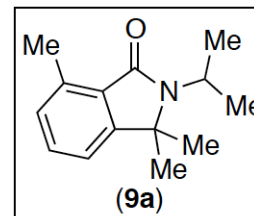

Current Data Parameters  
NAME Jun26-2013  
EXPNO 1509210  
PROCNO 1

F2 - Acquisition Parameters  
Date\_ 20130626  
Time 23.27  
INSTRUM spect  
PROBHD 5 mm BBO 1H/13  
PULPROG zg30  
TD 65536  
SOLVENT CDCl3  
NS 16  
DS 2  
SWH 8012.820 Hz  
FIDRES 0.122266 Hz  
AQ 4.0894966 sec  
RG 40.3  
DW 62.400 usec  
DE 6.00 usec  
TE 300.0 K  
D1 1.00000000 sec

===== CHANNEL f1 =====  
NUC1 1H  
P1 11.75 usec  
PL1 -4.00 dB  
SFO1 400.1324710 MHz

F2 - Processing parameters  
SI 32768  
SF 400.1300000 MHz  
WDW EM  
SSB 0  
LB 0.30 Hz  
GB 0  
PC 1.00

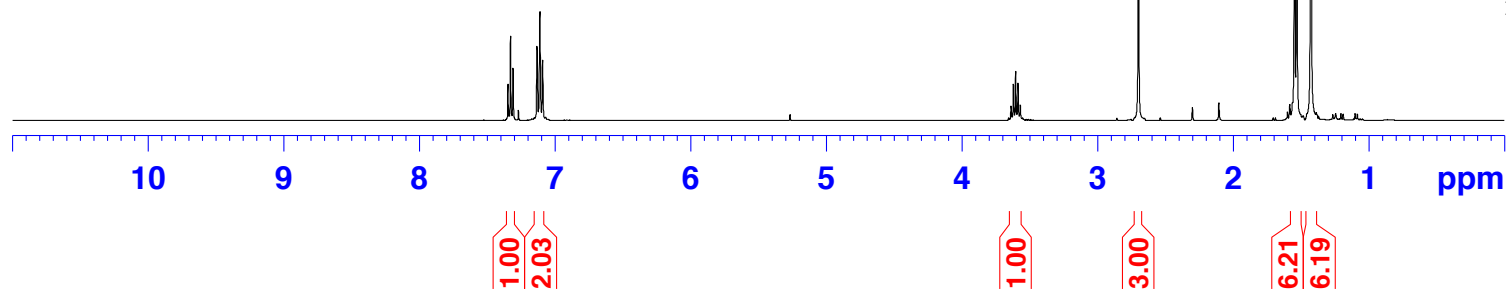

DK-XII-WW-76 Concentrated

user: we...  
team: research-kalyani holder: 6  
solvent: CDCl3 expt: C13CPD32 NS=2048;D1=2;  
standard C13 experiment ()

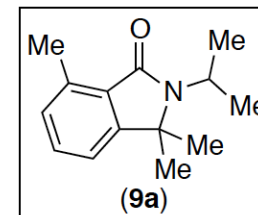

Current Data Parameters  
NAME Jun26-2013  
EXPNO 1509310  
PROCNO 1

F2 - Acquisition Parameters  
Date\_ 20130627  
Time 1.23  
INSTRUM spect  
PROBHD 5 mm BBO 1H/13  
PULPROG zgpg30  
TD 65536  
SOLVENT CDCl3  
NS 2048  
DS 2  
SWH 23980.814 Hz  
FIDRES 0.365918 Hz  
AQ 1.3664756 sec  
RG 1448.2  
DW 20.850 usec  
DE 6.00 usec  
TE 300.0 K  
D1 2.00000000 sec  
d11 0.03000000 sec  
d12 0.00002000 sec

===== CHANNEL f1 =====  
NUC1 13C  
P1 9.00 usec  
PL1 -4.50 dB  
SFO1 100.6228298 MHz

===== CHANNEL f2 =====  
CPDPRG2 waltz16  
NUC2 1H  
PCPD2 90.00 usec  
PL2 -4.00 dB  
PL12 13.68 dB  
PL13 17.24 dB  
SFO2 400.1316005 MHz

F2 - Processing parameters  
SI 32768  
SF 100.6127690 MHz  
WDW EM

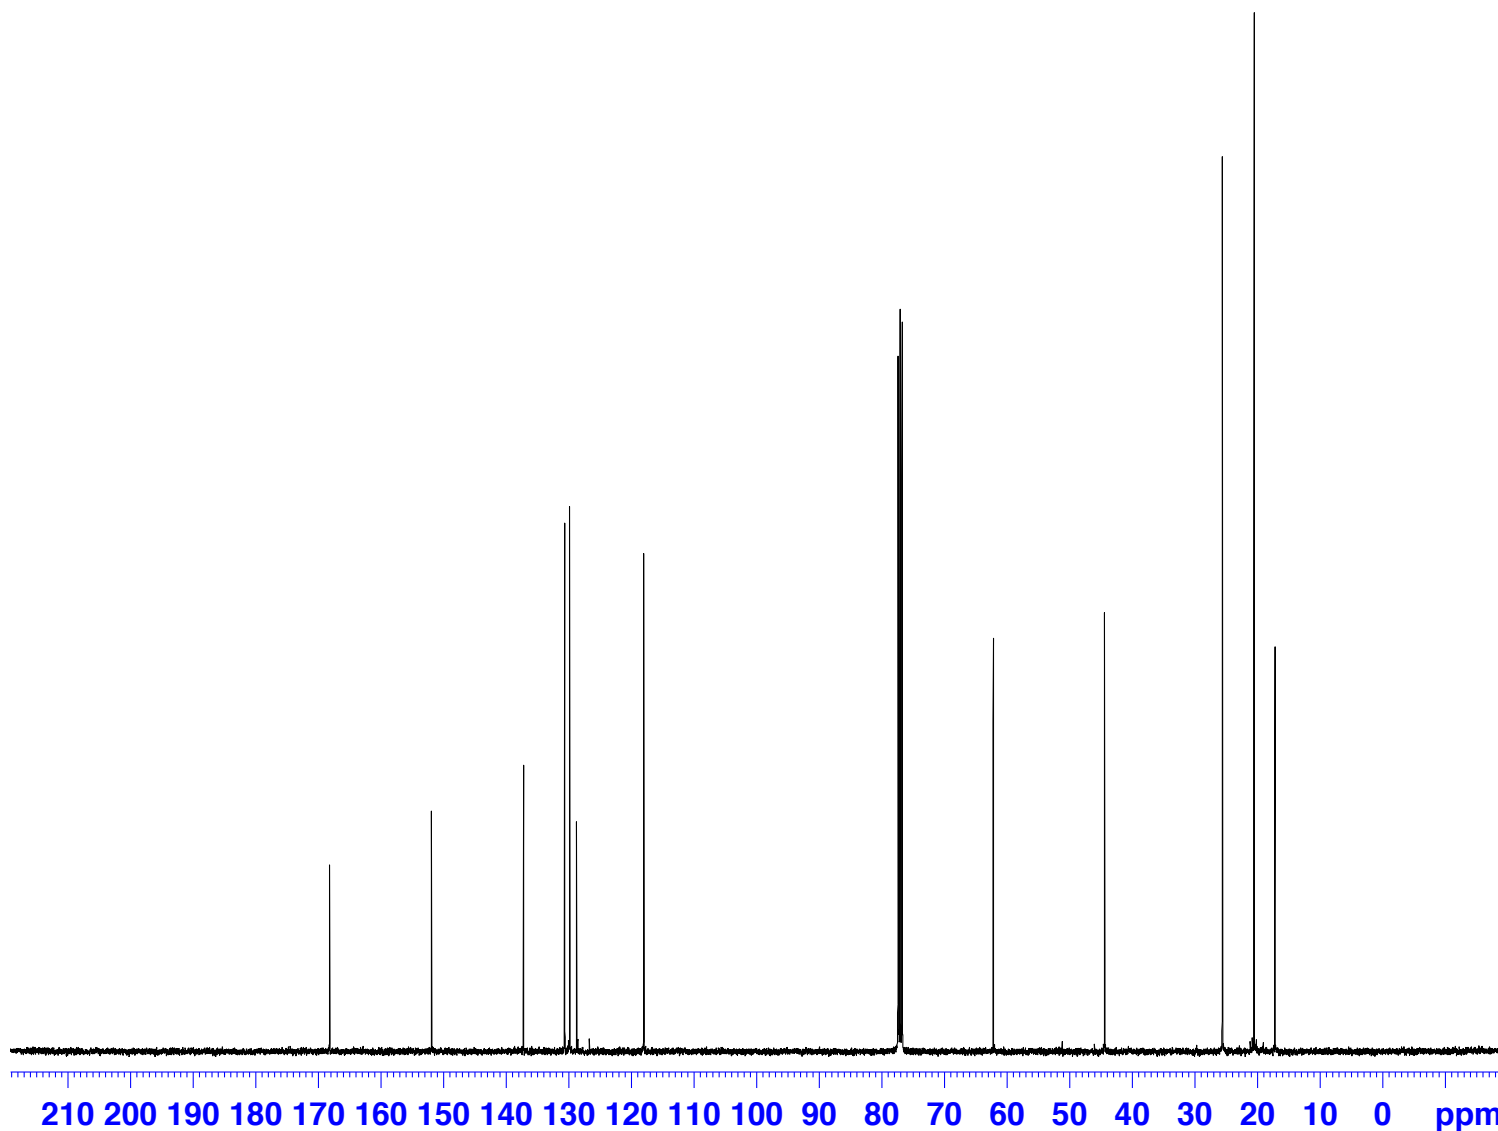

DK-VIII-LW-59\_frac.65-91\_concentrated2

user: wo...  
team: research-kalyani-wolfel holder: 2  
solvent: CDCl3 expt: PROTON NS=16;SW=20;  
standard 1H experiment ()

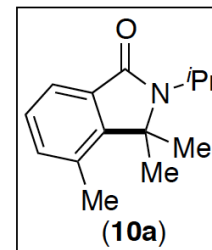

Current Data Parameters  
NAME Jun26-2013  
EXPNO 1508810  
PROCNO 1

F2 - Acquisition Parameters  
Date\_ 20130626  
Time 19.24  
INSTRUM spect  
PROBHD 5 mm BBO 1H/13  
PULPROG zg30  
TD 65536  
SOLVENT CDCl3  
NS 16  
DS 2  
SWH 8012.820 Hz  
FIDRES 0.122266 Hz  
AQ 4.0894966 sec  
RG 114  
DW 62.400 usec  
DE 6.00 usec  
TE 300.0 K  
D1 1.00000000 sec

===== CHANNEL f1 =====  
NUC1 1H  
P1 11.75 usec  
PL1 -4.00 dB  
SFO1 400.1324710 MHz

F2 - Processing parameters  
SI 32768  
SF 400.1300000 MHz  
WDW EM  
SSB 0  
LB 0.30 Hz  
GB 0  
PC 1.00

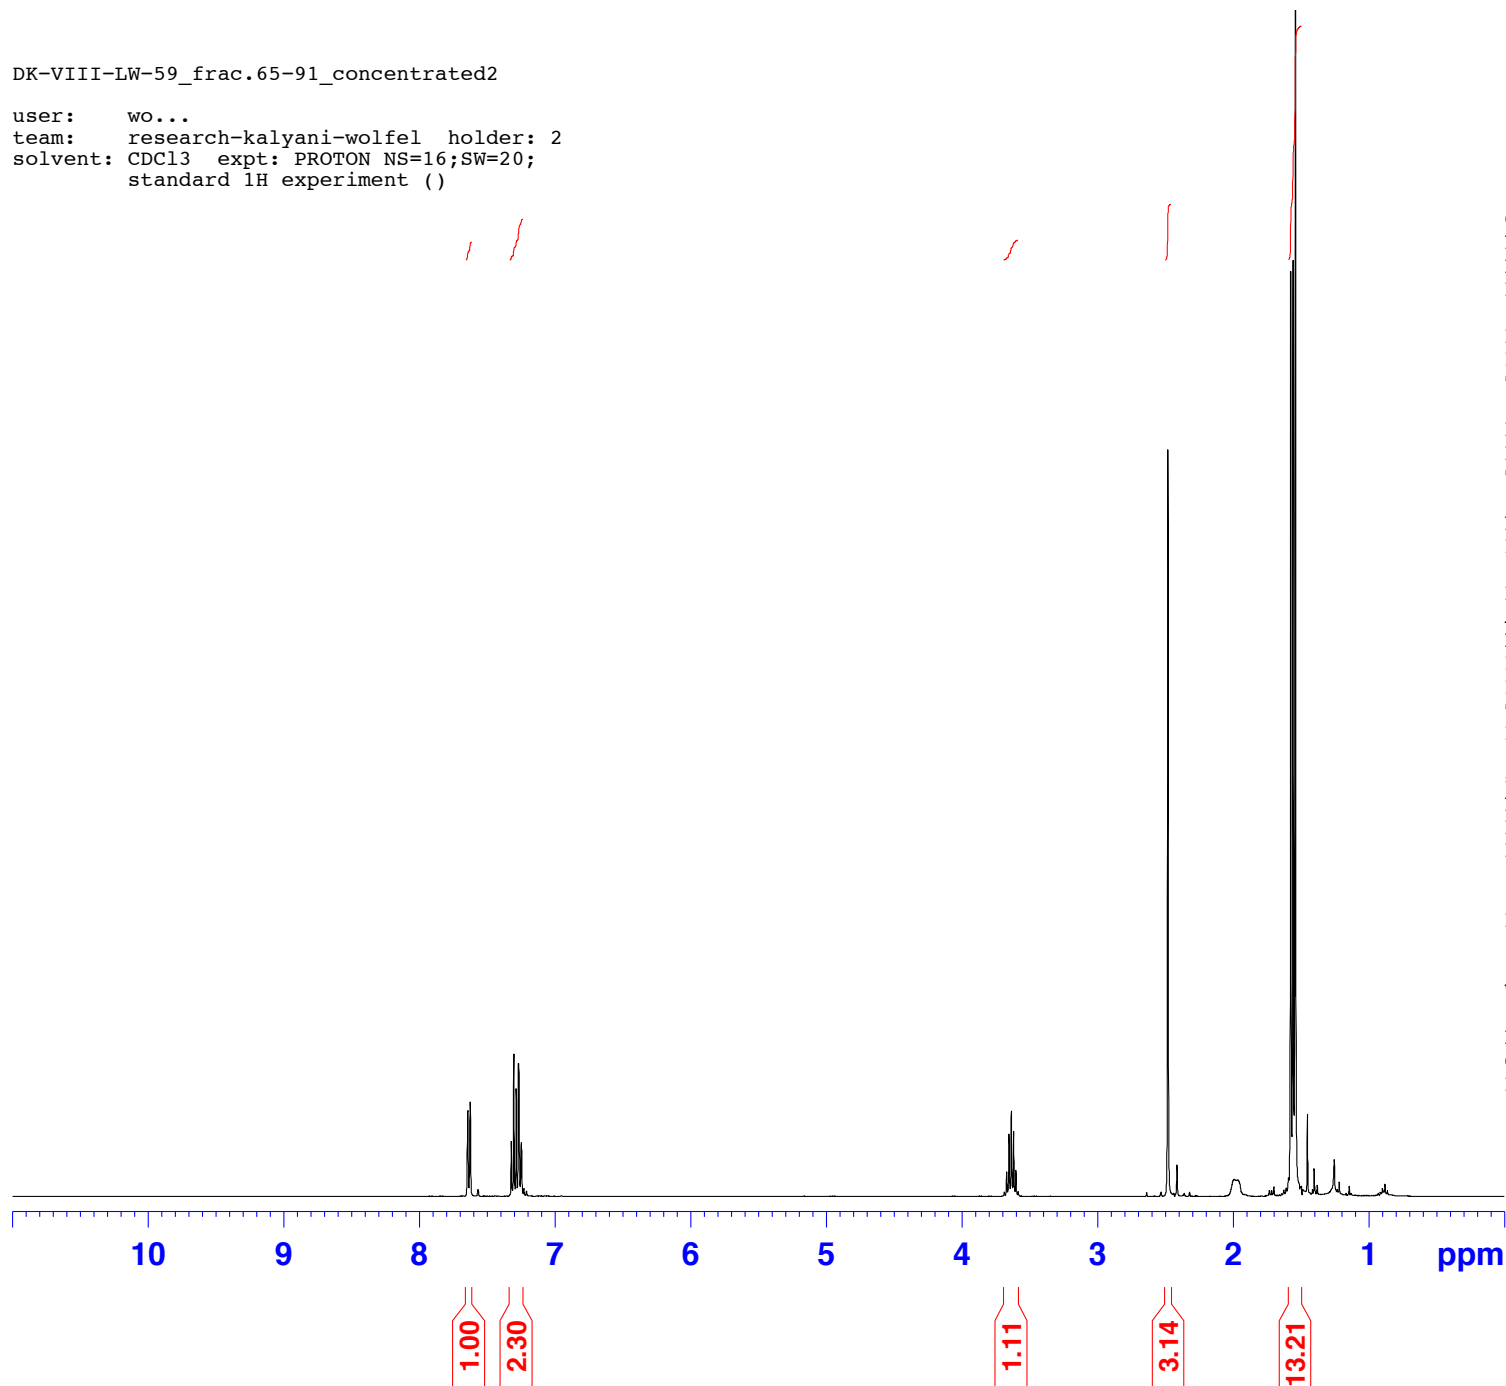

DK-VIII-LW-59\_frac.65-91\_concentrated2

user: wo...  
team: research-kalyani-wolfel holder: 2  
solvent: CDCl3 expt: C13CPD32 NS=2048;D1=2;  
standard C13 experiment ()

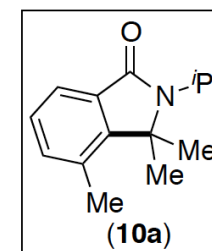

Current Data Parameters  
NAME Jun26-2013  
EXPNO 1508910  
PROCNO 1

F2 - Acquisition Parameters  
Date\_ 20130626  
Time 23.21  
INSTRUM spect  
PROBHD 5 mm BBO 1H/13  
PULPROG zgpg30  
TD 65536  
SOLVENT CDCl3  
NS 2048  
DS 2  
SWH 23980.814 Hz  
FIDRES 0.365918 Hz  
AQ 1.3664756 sec  
RG 2048  
DW 20.850 usec  
DE 6.00 usec  
TE 300.0 K  
D1 2.00000000 sec  
d11 0.03000000 sec  
d12 0.00002000 sec

===== CHANNEL f1 =====  
NUC1 13C  
P1 9.00 usec  
PL1 -4.50 dB  
SFO1 100.6228298 MHz

===== CHANNEL f2 =====  
CPDPRG2 waltz16  
NUC2 1H  
PCPD2 90.00 usec  
PL2 -4.00 dB  
PL12 13.68 dB  
PL13 17.24 dB  
SFO2 400.1316005 MHz

F2 - Processing parameters  
SI 32768  
SF 100.6127690 MHz  
WDW EM

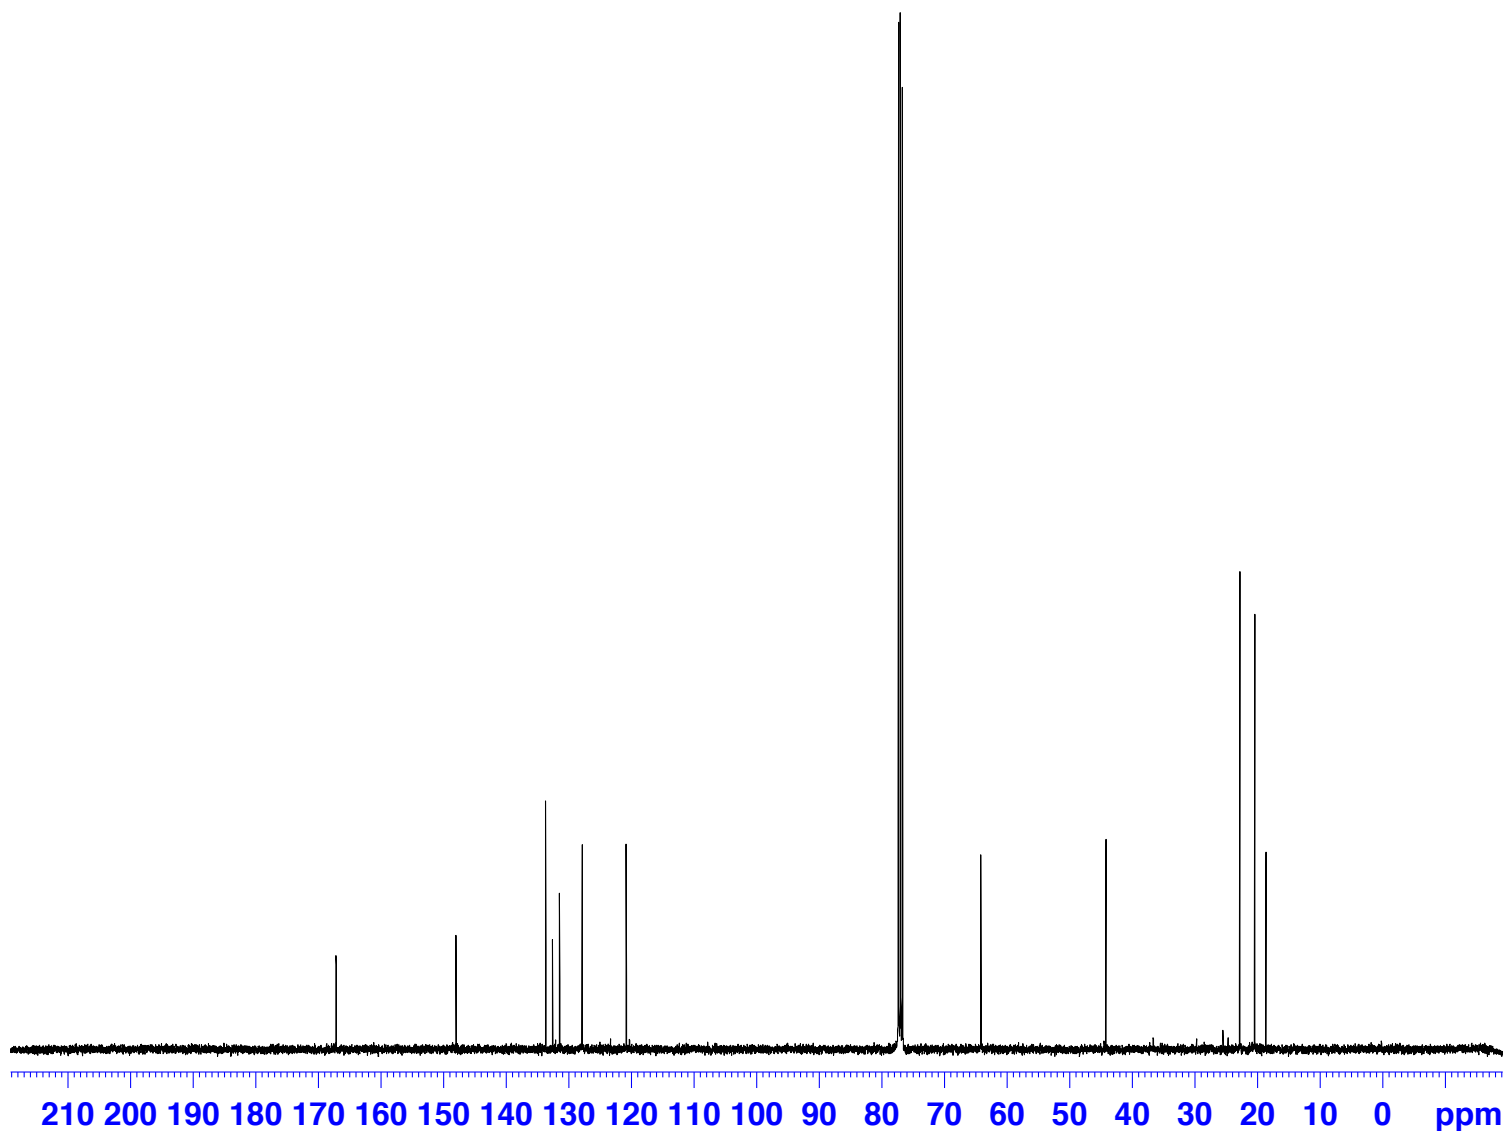

DK-VIII-LW-59\_frac.47-58\_concentrated

user: wo...  
team: research-kalyani-wolfel holder: 3  
solvent: CDCl3 expt: PROTON NS=16;SW=20;  
standard 1H experiment ()

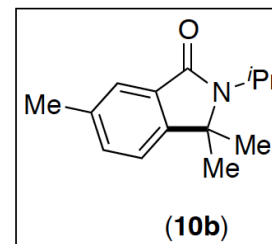

Current Data Parameters  
NAME Jun25-2013  
EXPNO 1504810  
PROCNO 1

F2 - Acquisition Parameters  
Date\_ 20130625  
Time 18.53  
INSTRUM spect  
PROBHD 5 mm BBO 1H/13  
PULPROG zg30  
TD 65536  
SOLVENT CDCl3  
NS 16  
DS 2  
SWH 8012.820 Hz  
FIDRES 0.122266 Hz  
AQ 4.0894966 sec  
RG 101.6  
DW 62.400 usec  
DE 6.00 usec  
TE 300.0 K  
D1 1.00000000 sec

===== CHANNEL f1 =====  
NUC1 1H  
P1 11.75 usec  
PL1 -4.00 dB  
SFO1 400.1324710 MHz

F2 - Processing parameters  
SI 32768  
SF 400.1300000 MHz  
WDW EM  
SSB 0  
LB 0.30 Hz  
GB 0  
PC 1.00

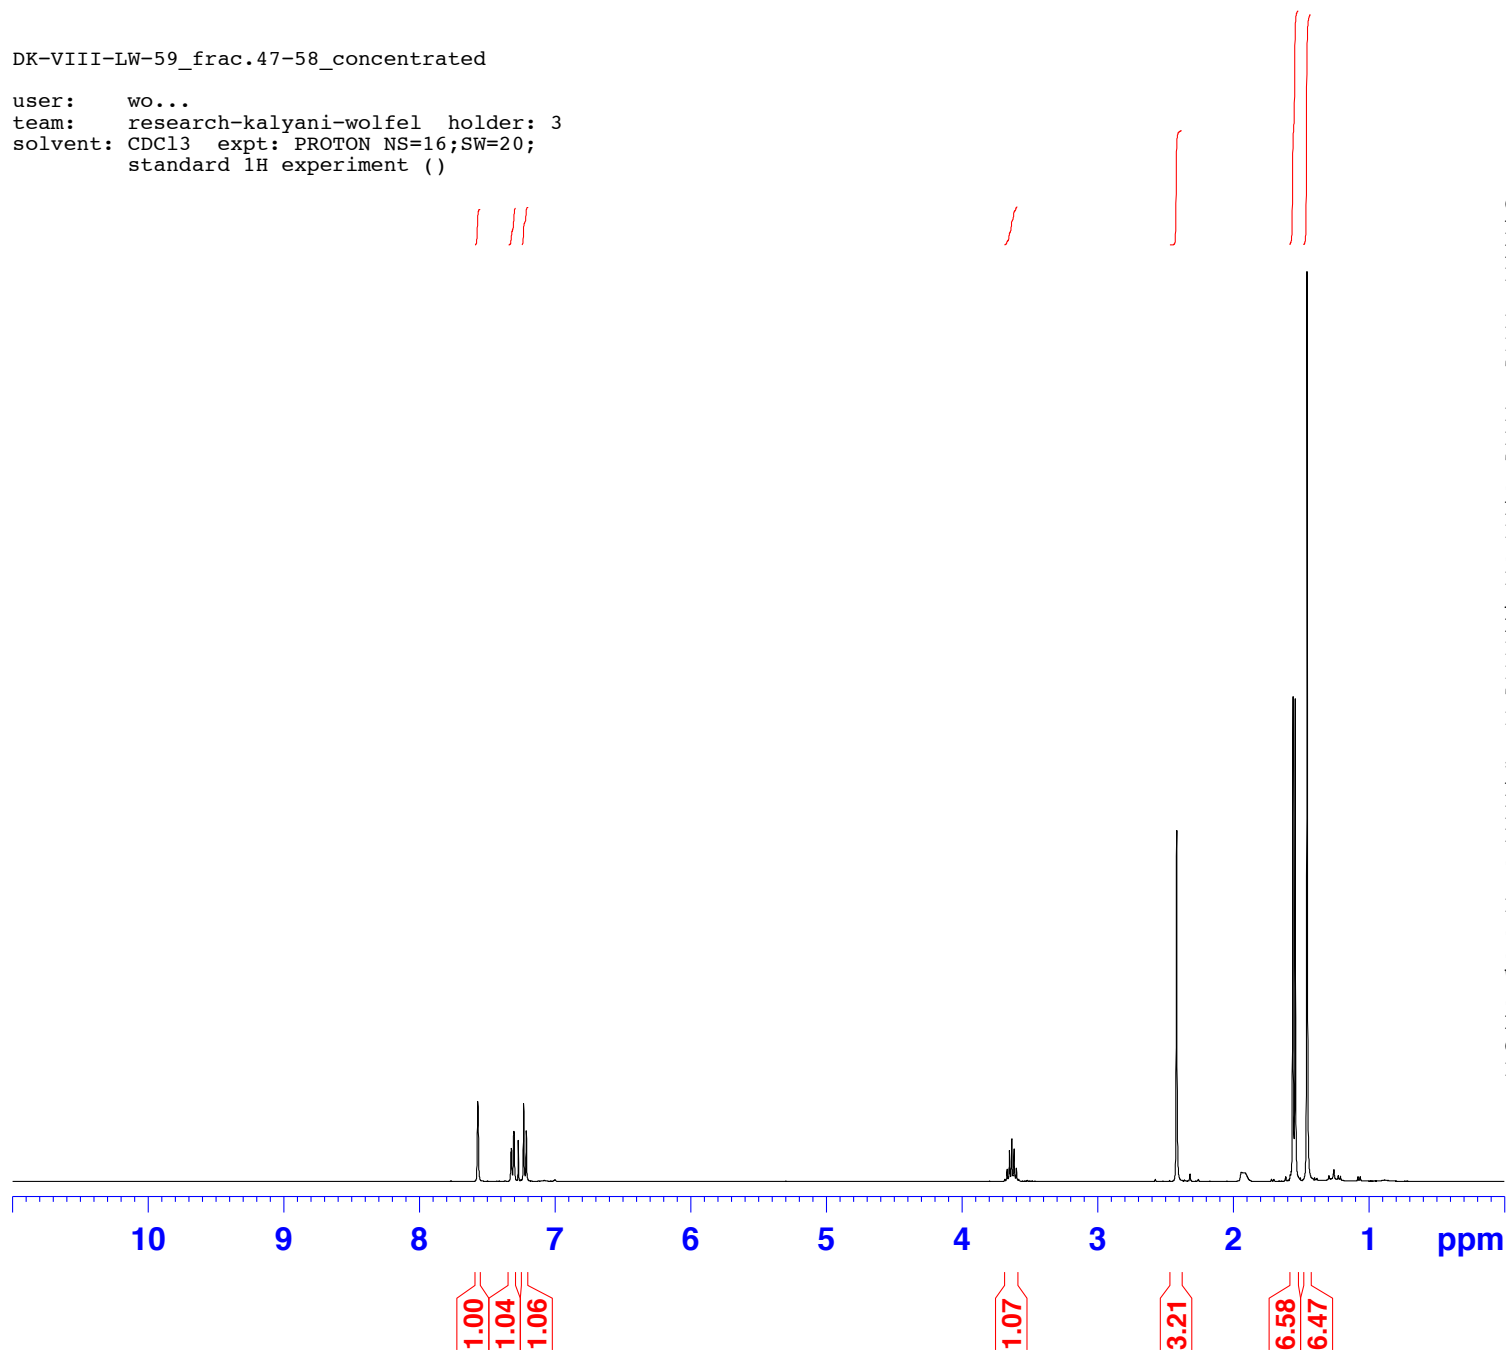

DK-VIII-LW-59\_frac.47-58\_concentrated\_acetone

user: wo...  
team: research-kalyani-wolfel holder: 1  
solvent: Acetone expt: C13CPD32 NS=2048;D1=2;  
standard C13 experiment ()

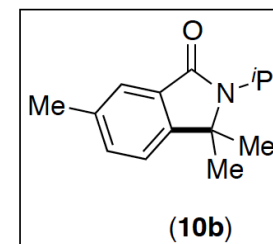

Current Data Parameters  
NAME Jun26-2013  
EXPNO 1508710  
PROCNO 1

F2 - Acquisition Parameters  
Date\_ 20130626  
Time 19.12  
INSTRUM spect  
PROBHD 5 mm BBO 1H/13  
PULPROG zgpg30  
TD 65536  
SOLVENT Acetone  
NS 2048  
DS 2  
SWH 23980.814 Hz  
FIDRES 0.365918 Hz  
AQ 1.3664756 sec  
RG 2580.3  
DW 20.850 usec  
DE 6.00 usec  
TE 300.0 K  
D1 2.00000000 sec  
d11 0.03000000 sec  
d12 0.00002000 sec

===== CHANNEL f1 =====  
NUC1 13C  
P1 9.00 usec  
PL1 -4.50 dB  
SFO1 100.6228298 MHz

===== CHANNEL f2 =====  
CPDPRG2 waltz16  
NUC2 1H  
PCPD2 90.00 usec  
PL2 -4.00 dB  
PL12 13.68 dB  
PL13 17.24 dB  
SFO2 400.1316005 MHz

F2 - Processing parameters  
SI 32768  
SF 100.6127690 MHz  
WDW EM

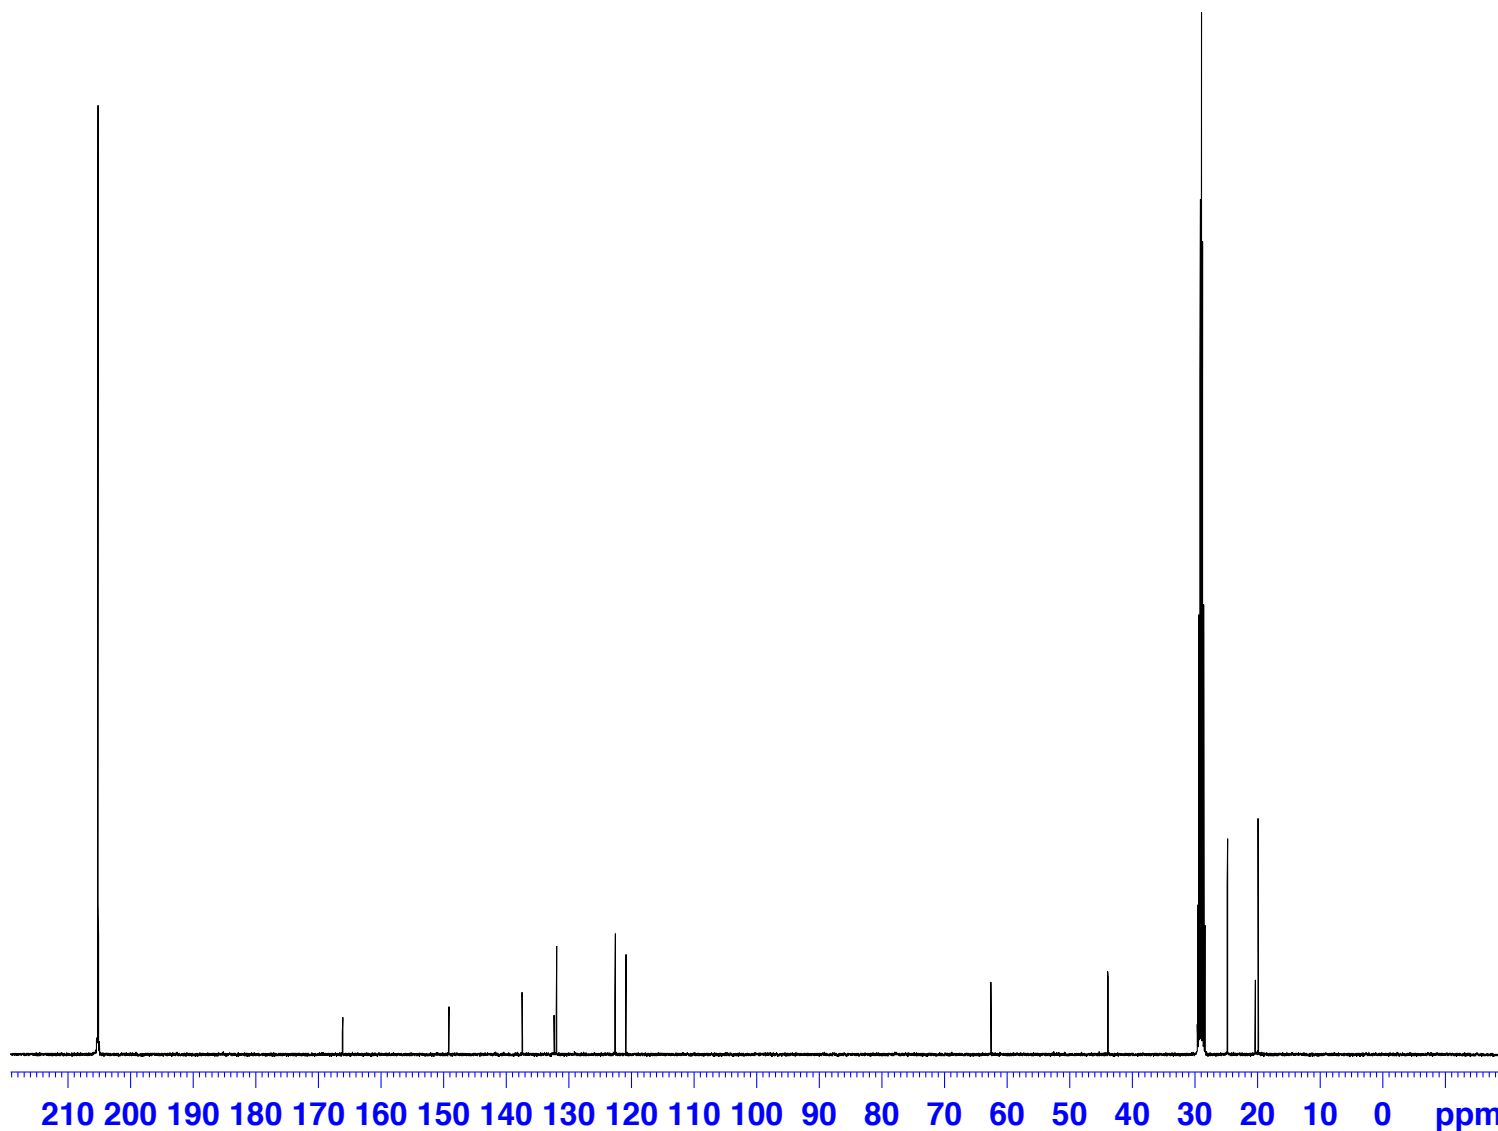

DK-VIII-LW-57 Fr. 46-59 Concentrated

user: we...  
team: research-kalyani holder: 10  
solvent: CDCl3 expt: PROTON NS=16;SW=20;  
standard 1H experiment ()

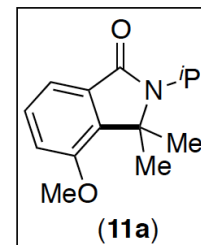

Current Data Parameters  
NAME Jun27-2013  
EXPNO 1513610  
PROCNO 1

F2 - Acquisition Parameters  
Date\_ 20130628  
Time 3.33  
INSTRUM spect  
PROBHD 5 mm BBO 1H/13  
PULPROG zg30  
TD 65536  
SOLVENT CDCl3  
NS 16  
DS 2  
SWH 8012.820 Hz  
FIDRES 0.122266 Hz  
AQ 4.0894966 sec  
RG 64  
DW 62.400 usec  
DE 6.00 usec  
TE 300.0 K  
D1 1.00000000 sec

===== CHANNEL f1 =====  
NUC1 1H  
P1 11.75 usec  
PL1 -4.00 dB  
SFO1 400.1324710 MHz

F2 - Processing parameters  
SI 32768  
SF 400.1300000 MHz  
WDW EM  
SSB 0  
LB 0.30 Hz  
GB 0  
PC 1.00

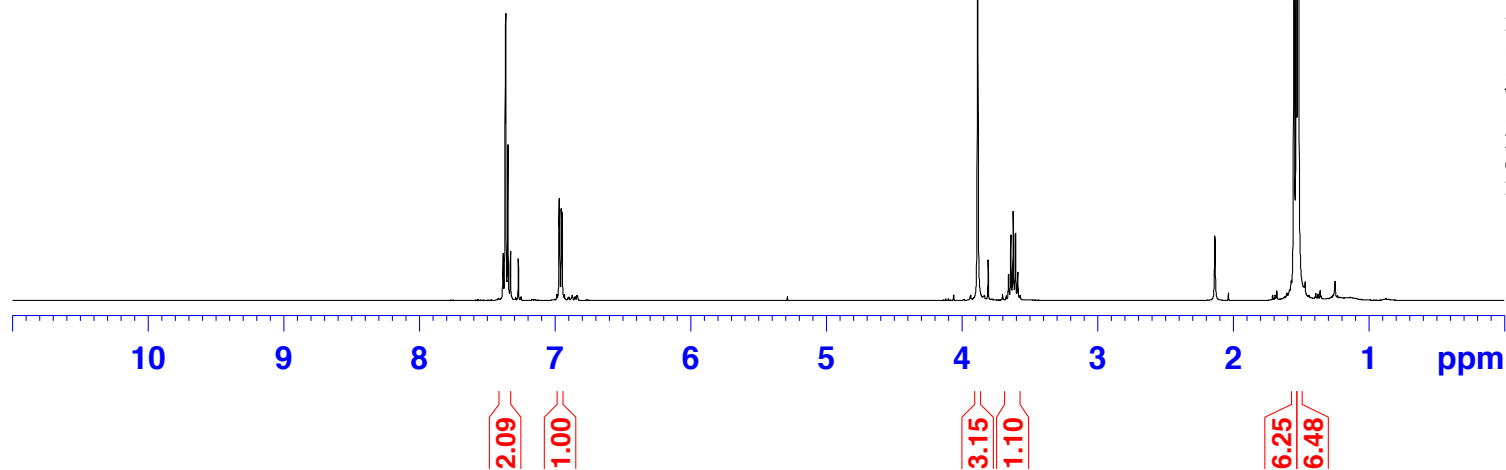



DK-VIII-LW-57 Fr. 46-59 Concentrated

user: we...  
team: research-kalyani holder: 10  
solvent: CDCl<sub>3</sub> expt: C13CPD32 NS=2048;D1=2;  
standard C13 experiment ()

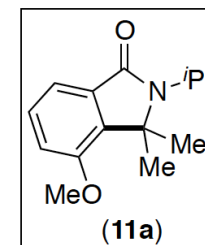

Current Data Parameters  
NAME Jun27-2013  
EXPNO 1513710  
PROCNO 1

F2 - Acquisition Parameters  
Date\_ 20130628  
Time 5.38  
INSTRUM spect  
PROBHD 5 mm BBO 1H/13  
PULPROG zgpg30  
TD 65536  
SOLVENT CDCl<sub>3</sub>  
NS 2048  
DS 2  
SWH 23980.814 Hz  
FIDRES 0.365918 Hz  
AQ 1.3664756 sec  
RG 3251  
DW 20.850 usec  
DE 6.00 usec  
TE 300.0 K  
D1 2.00000000 sec  
d11 0.03000000 sec  
d12 0.00002000 sec

===== CHANNEL f1 =====  
NUC1 13C  
P1 9.00 usec  
PL1 -4.50 dB  
SFO1 100.6228298 MHz

===== CHANNEL f2 =====  
CPDPRG2 waltz16  
NUC2 1H  
PCPD2 90.00 usec  
PL2 -4.00 dB  
PL12 13.68 dB  
PL13 17.24 dB  
SFO2 400.1316005 MHz

F2 - Processing parameters  
SI 32768  
SF 100.6127690 MHz  
WDW EM

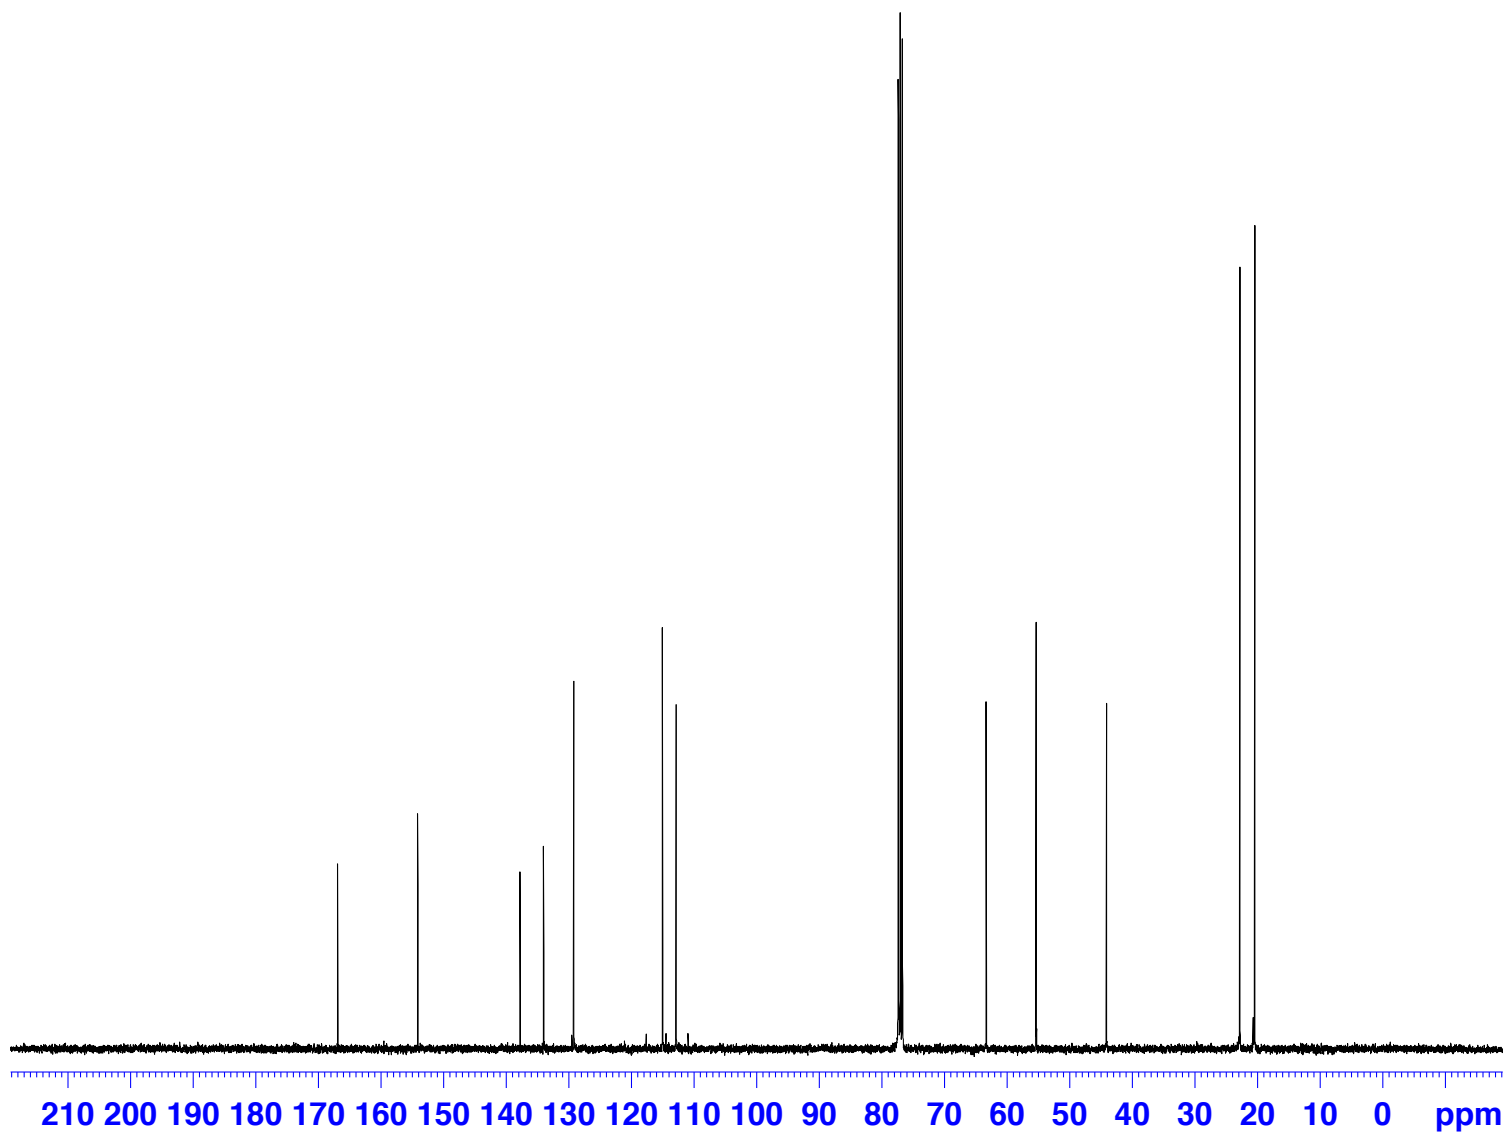

DK-LW-57c-fr67-86-cdcl3

user: ka...  
team: research-kalyani holder: 14  
solvent: CDCl3 expt: PROTON NS=16;SW=20;  
standard 1H experiment (1 Min 34 Sec)

sample for this spectra contained a small amount of 11a

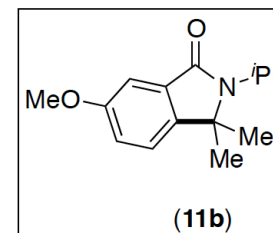

Current Data Parameters  
NAME Jun08-2013  
EXPNO 1472110  
PROCNO 1

F2 - Acquisition Parameters  
Date\_ 20130608  
Time 15.11  
INSTRUM spect  
PROBHD 5 mm BBO 1H/13  
PULPROG zg30  
TD 65536  
SOLVENT CDCl3  
NS 16  
DS 2  
SWH 8012.820 Hz  
FIDRES 0.122266 Hz  
AQ 4.0894966 sec  
RG 114  
DW 62.400 usec  
DE 6.00 usec  
TE 300.0 K  
D1 1.00000000 sec

===== CHANNEL f1 =====  
NUC1 1H  
P1 11.75 usec  
PL1 -4.00 dB  
SFO1 400.1324710 MHz

F2 - Processing parameters  
SI 32768  
SF 400.1300000 MHz  
WDW EM  
SSB 0  
LB 0.30 Hz  
GB 0  
PC 1.00

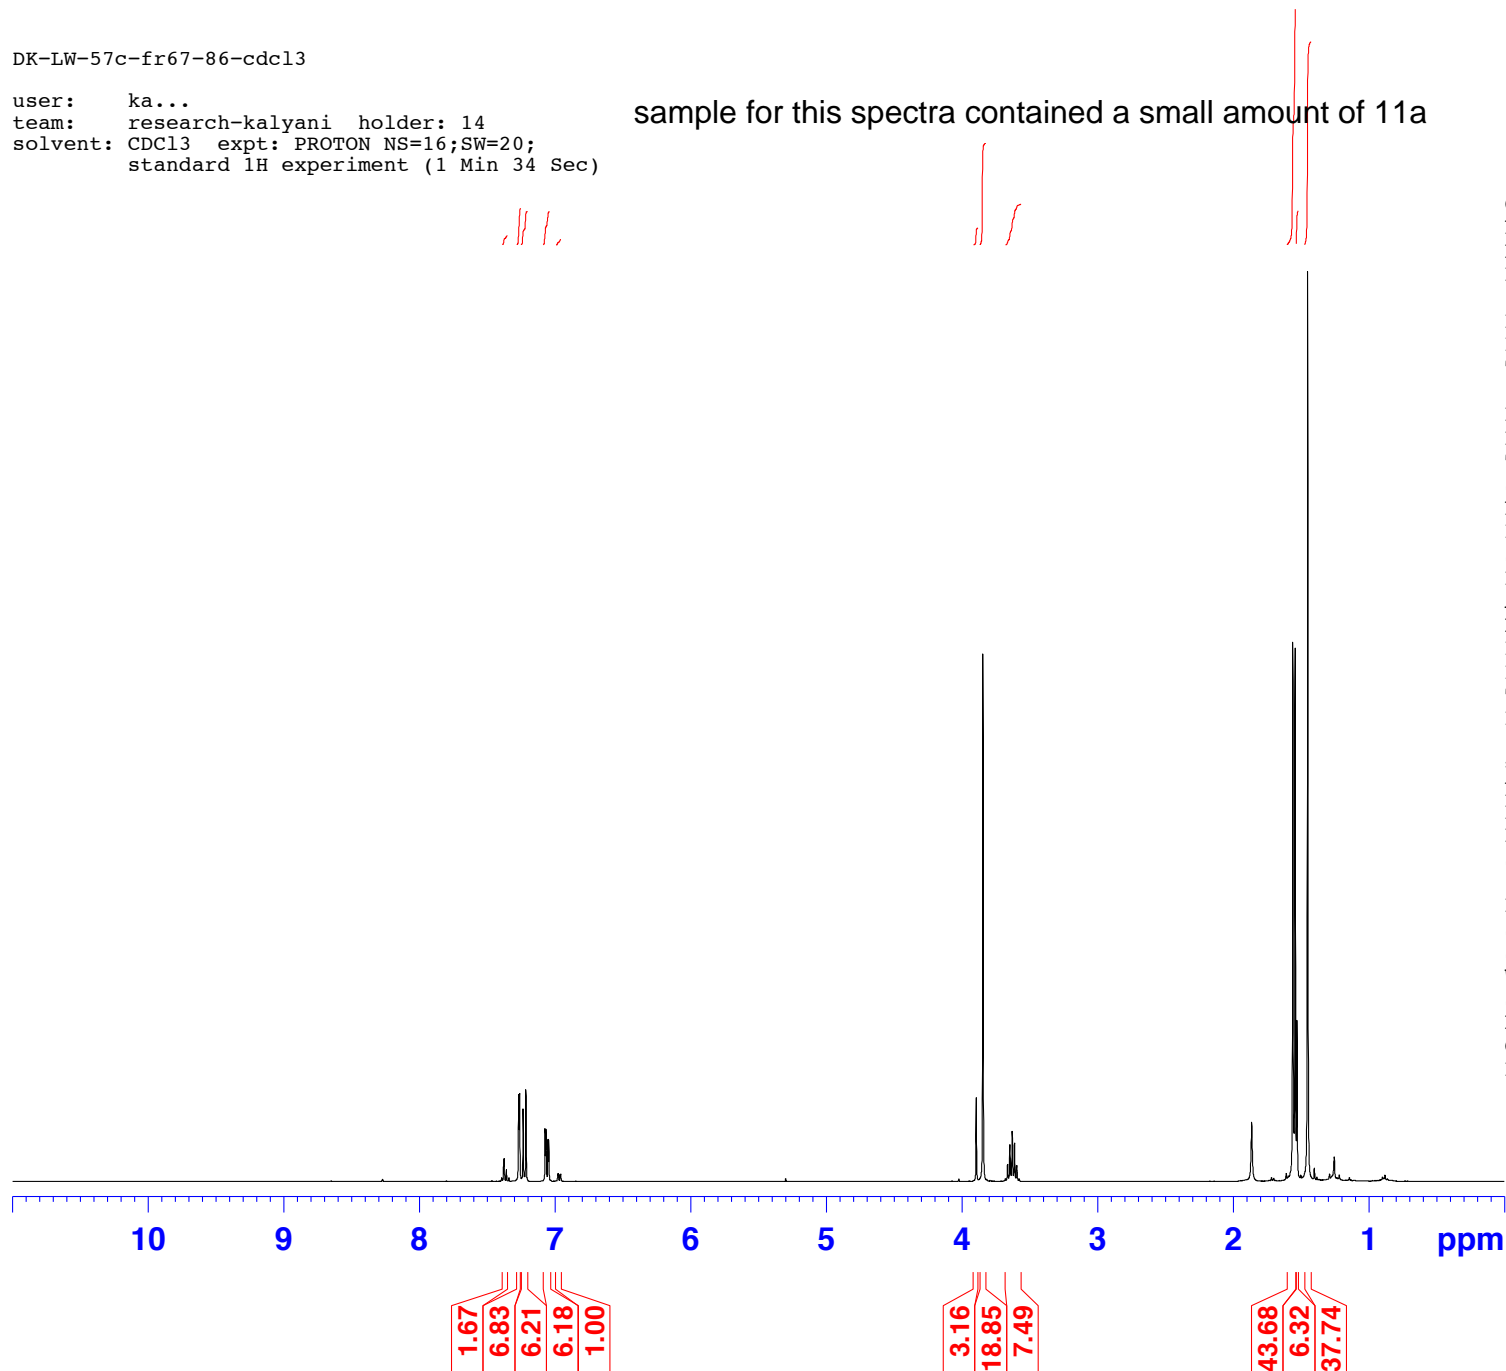

DK-12-LW-57c-68-76-carbon

user: ka...  
team: research-kalyani holder: 14  
solvent: CDCl<sub>3</sub> expt: C13CPD32 NS=4096;D1=2;  
standard C13 experiment (3 Hr 50 Min 13 Sec)

sample for this spectra contained a small amount of 11a

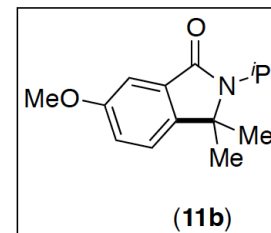

Current Data Parameters  
NAME Jun08-2013  
EXPNO 1472310  
PROCNO 1

F2 - Acquisition Parameters  
Date\_ 20130608  
Time 19.25  
INSTRUM spect  
PROBHD 5 mm BBO 1H/13  
PULPROG zgpg30  
TD 65536  
SOLVENT CDCl<sub>3</sub>  
NS 4096  
DS 2  
SWH 23980.814 Hz  
FIDRES 0.365918 Hz  
AQ 1.3664756 sec  
RG 912.3  
DW 20.850 usec  
DE 6.00 usec  
TE 300.0 K  
D1 2.00000000 sec  
d11 0.03000000 sec  
d12 0.00002000 sec

===== CHANNEL f1 =====  
NUC1 13C  
P1 9.00 usec  
PL1 -4.50 dB  
SFO1 100.6228298 MHz

===== CHANNEL f2 =====  
CPDPRG2 waltz16  
NUC2 1H  
PCPD2 90.00 usec  
PL2 -4.00 dB  
PL12 13.68 dB  
PL13 17.24 dB  
SFO2 400.1316005 MHz

F2 - Processing parameters  
SI 32768  
SF 100.6127690 MHz  
WDW EM

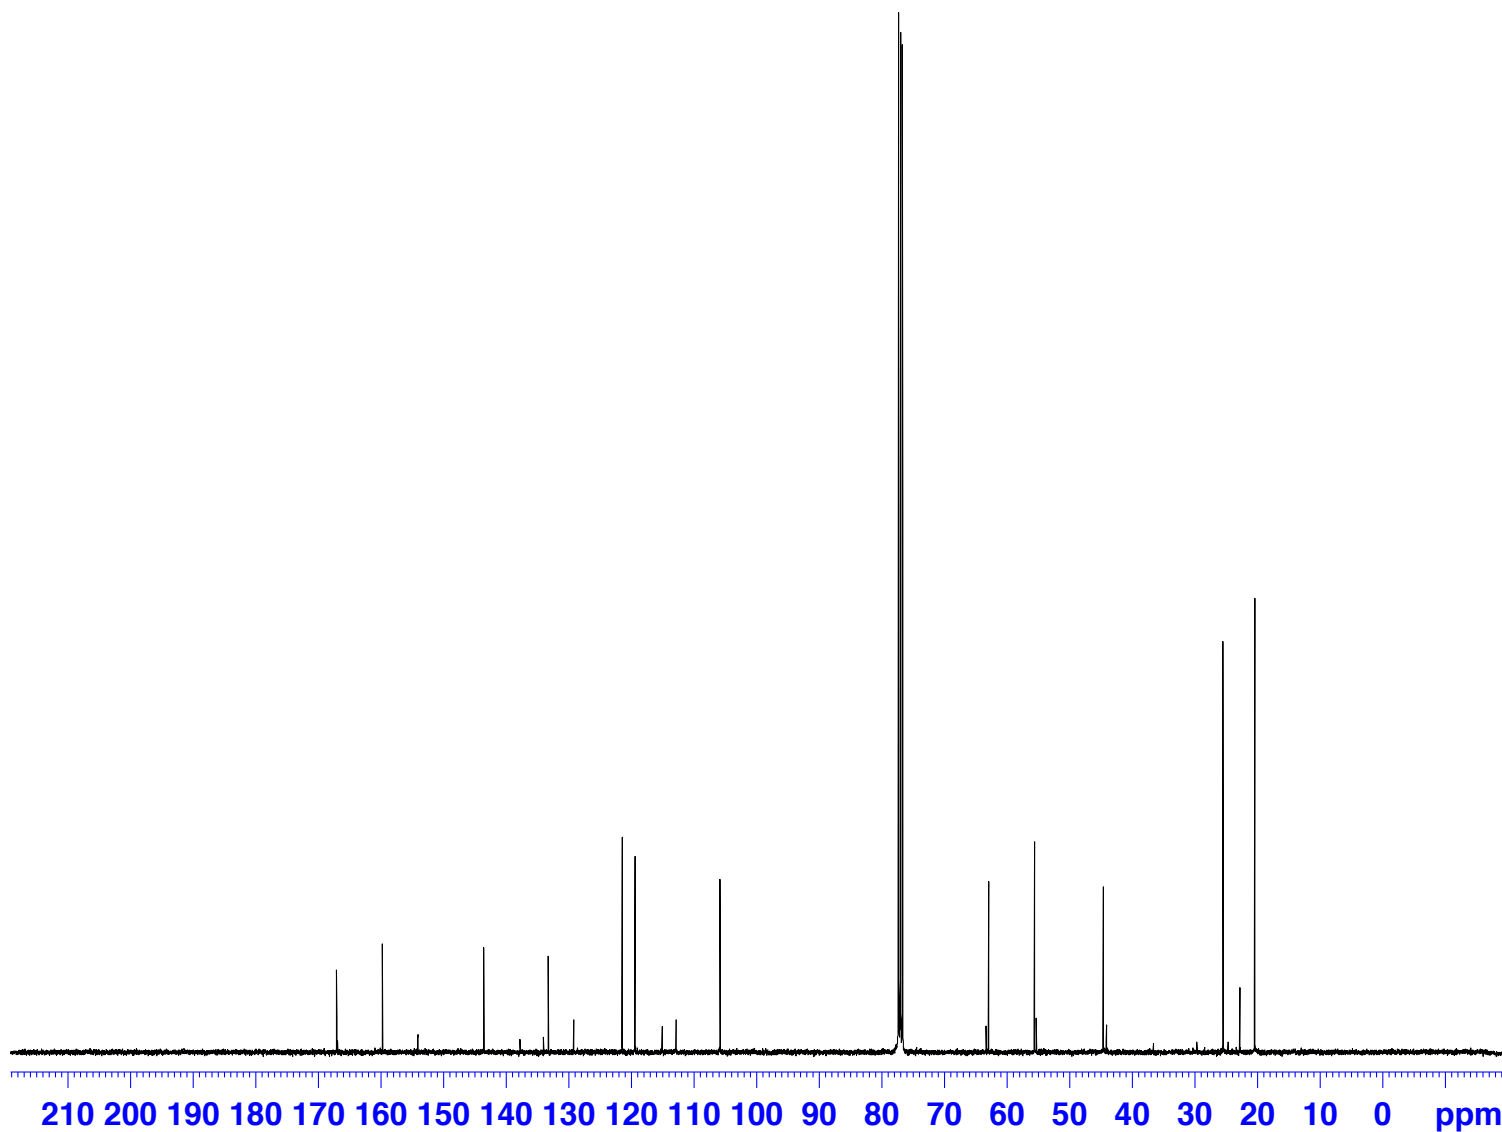

DK-VIII-LW-77 Fr. 71-79 CDCl<sub>3</sub>

user: we...  
team: research-kalyani holder: 3  
solvent: CDCl<sub>3</sub> expt: PROTON NS=16;SW=20;  
standard 1H experiment ()

Sample for this NMR spectra contained a small  
amount of 12b

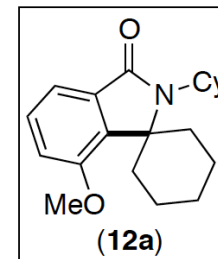

Current Data Parameters  
NAME Jul04-2013  
EXPNO 1526610  
PROCNO 1

F2 - Acquisition Parameters  
Date\_ 20130704  
Time 15.39  
INSTRUM spect  
PROBHD 5 mm BBO 1H/13  
PULPROG zg30  
TD 65536  
SOLVENT CDCl<sub>3</sub>  
NS 16  
DS 2  
SWH 8012.820 Hz  
FIDRES 0.122266 Hz  
AQ 4.0894966 sec  
RG 90.5  
DW 62.400 usec  
DE 6.00 usec  
TE 300.0 K  
D1 1.00000000 sec

===== CHANNEL f1 =====  
NUC1 1H  
P1 11.75 usec  
PL1 -4.00 dB  
SFO1 400.1324710 MHz

F2 - Processing parameters  
SI 32768  
SF 400.1300000 MHz  
WDW EM  
SSB 0  
LB 0.30 Hz  
GB 0  
PC 1.00

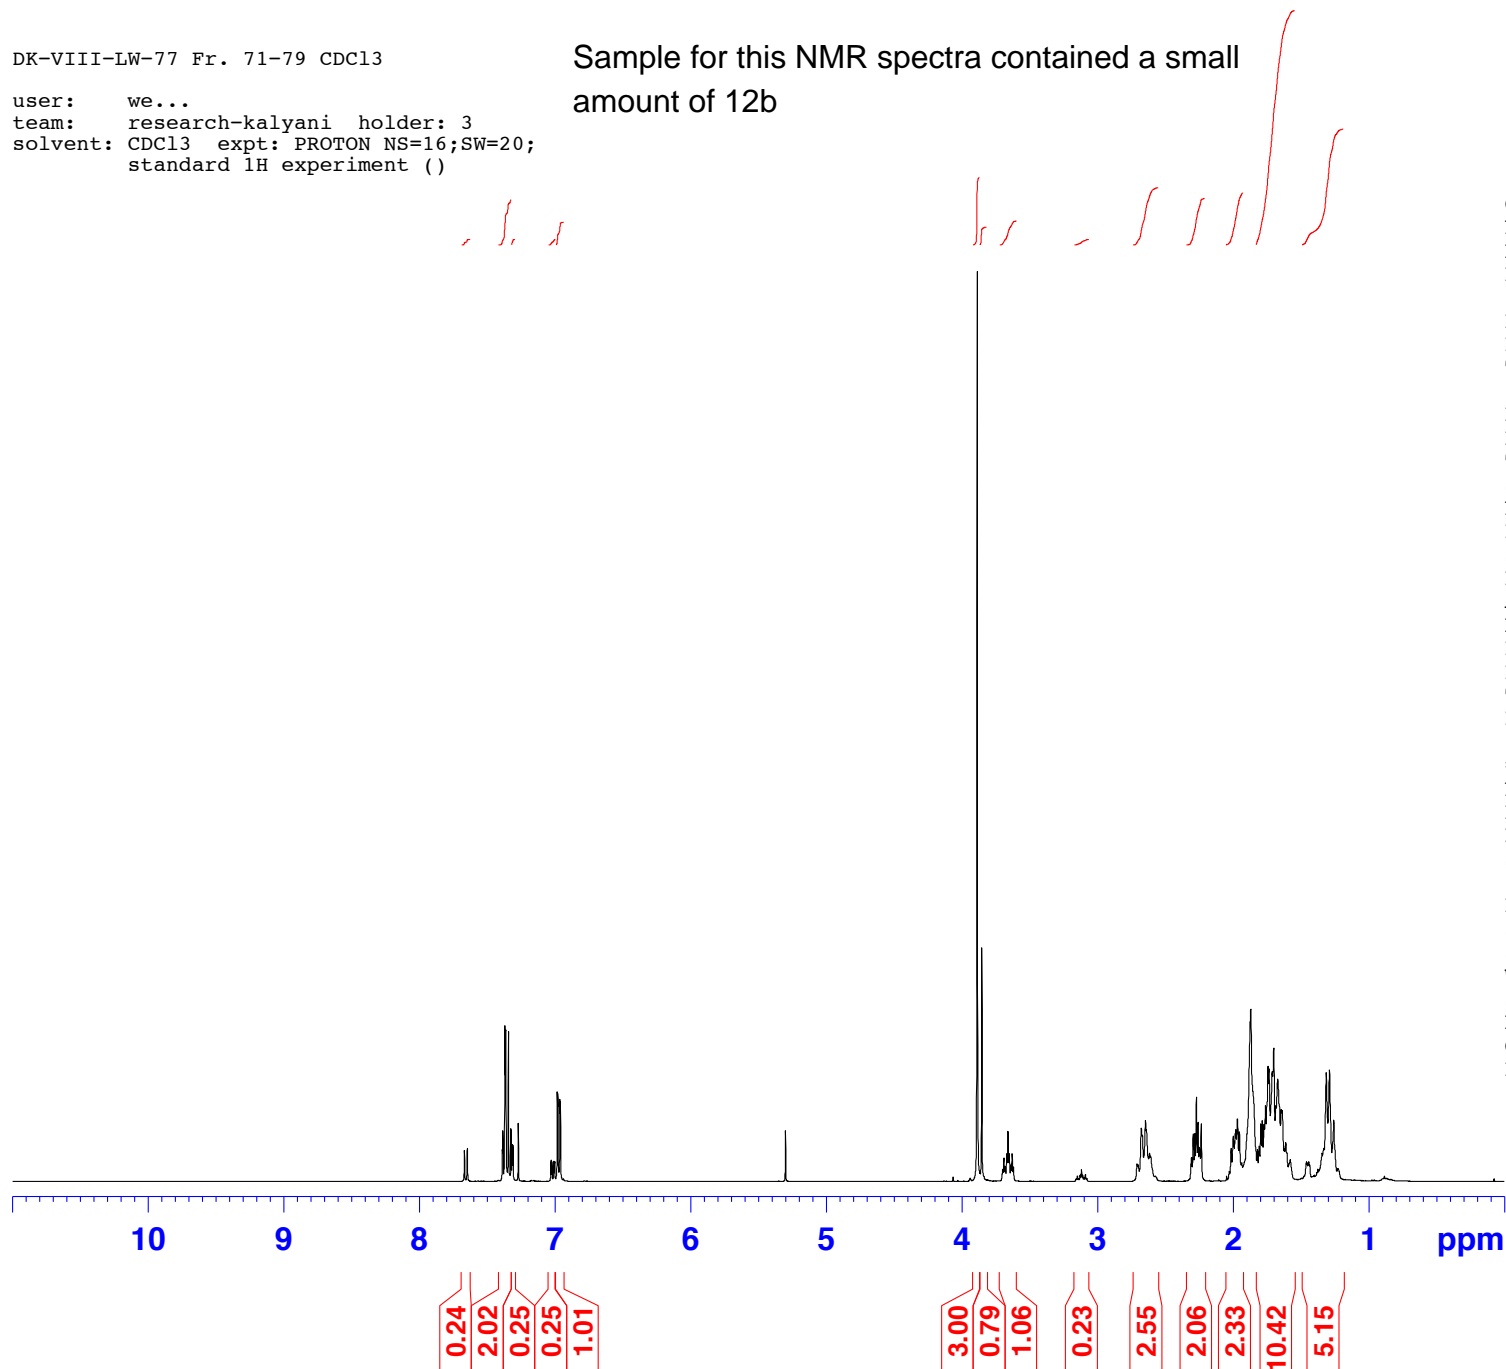

DK-VIII-LW-77 Fr. 71-79 CDCl<sub>3</sub>

user: we...  
team: research-kalyani holder: 3  
solvent: CDCl<sub>3</sub> expt: C13CPD32 NS=2048;D1=2;  
standard C13 experiment ()

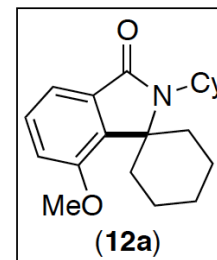

Sample for this NMR spectra contained a small amount of 12b

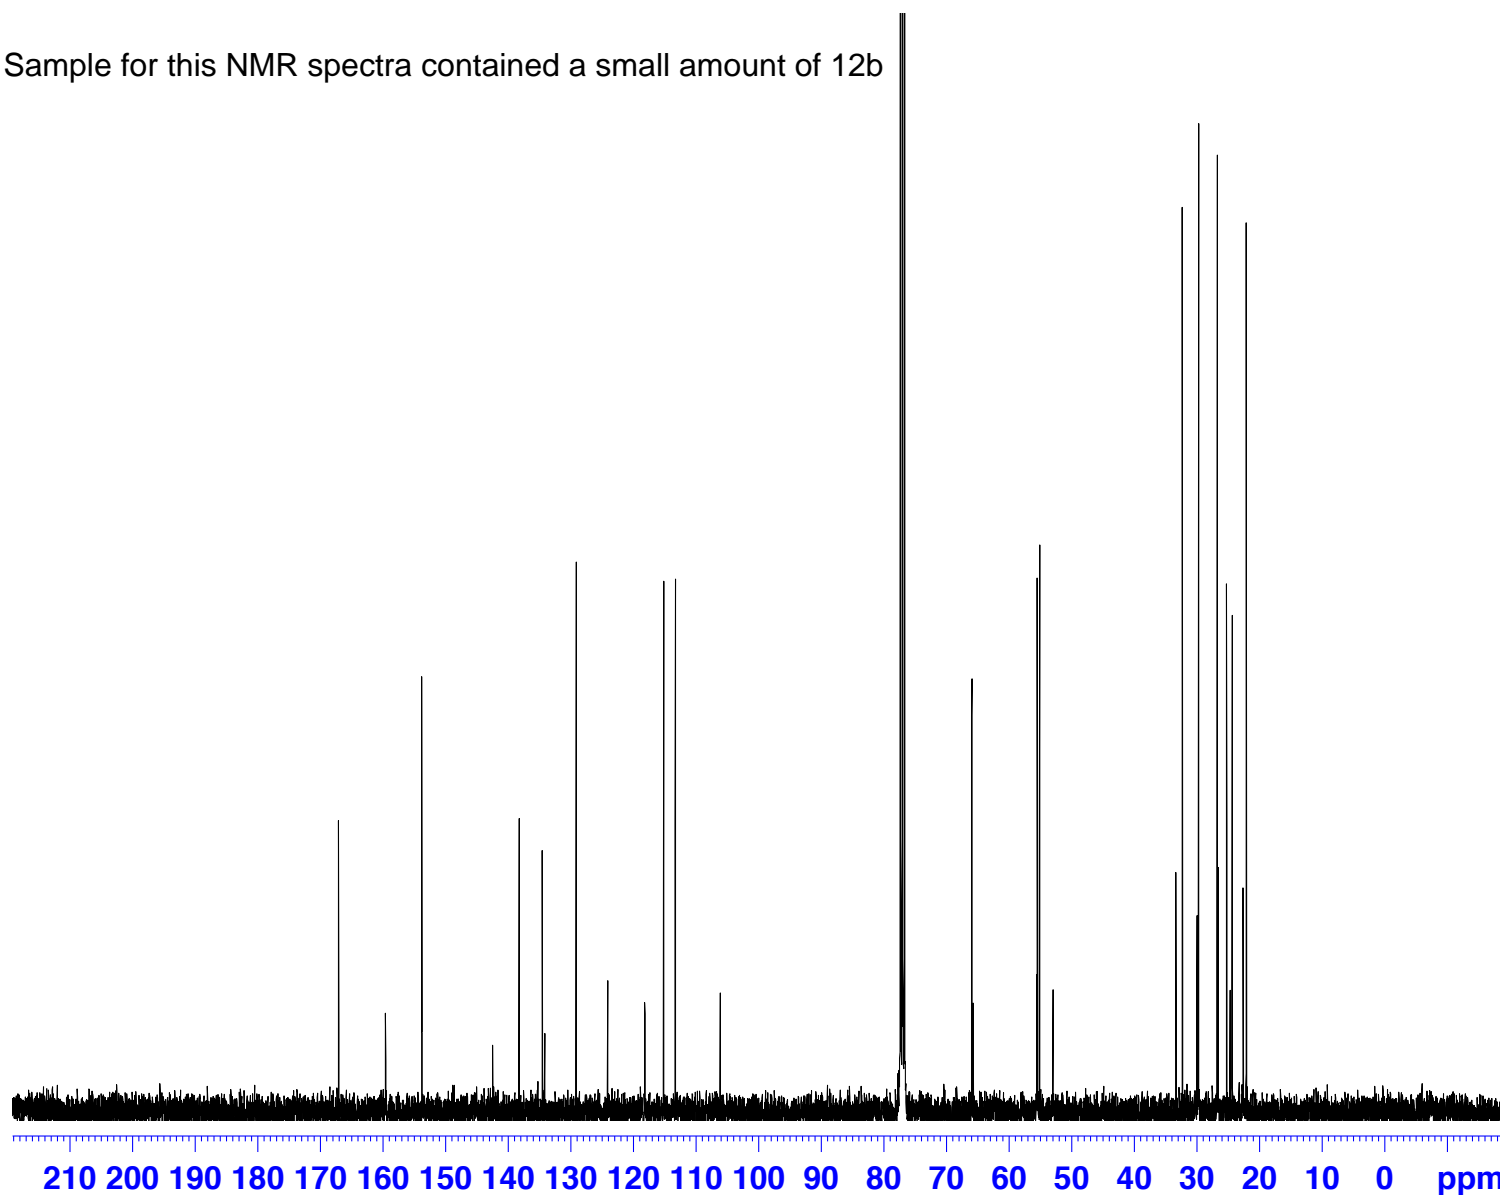

Current Data Parameters  
NAME Jul04-2013  
EXPNO 1526710  
PROCNO 1

F2 - Acquisition Parameters  
Date\_ 20130704  
Time 17.35  
INSTRUM spect  
PROBHD 5 mm BBO 1H/13  
PULPROG zgpg30  
TD 65536  
SOLVENT CDCl<sub>3</sub>  
NS 2048  
DS 2  
SWH 23980.814 Hz  
FIDRES 0.365918 Hz  
AQ 1.3664756 sec  
RG 2298.8  
DW 20.850 usec  
DE 6.00 usec  
TE 300.0 K  
D1 2.00000000 sec  
d11 0.03000000 sec  
d12 0.00002000 sec

===== CHANNEL f1 =====  
NUC1 13C  
P1 9.00 usec  
PL1 -4.50 dB  
SFO1 100.6228298 MHz

===== CHANNEL f2 =====  
CPDPRG2 waltz16  
NUC2 1H  
PCPD2 90.00 usec  
PL2 -4.00 dB  
PL12 13.68 dB  
PL13 17.24 dB  
SFO2 400.1316005 MHz

F2 - Processing parameters  
SI 32768  
SF 100.6127690 MHz  
WDW EM

DK-VIII-LW-73-C2-fr55-61\_concentrated

user: wo...  
team: research-kalyani-wolfel holder: 3  
solvent: CDCl3 expt: PROTON NS=16;SW=20;  
standard 1H experiment ()

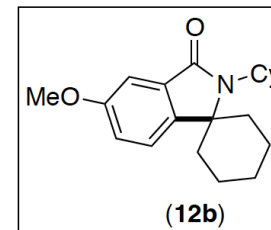

Current Data Parameters  
NAME Jul03-2013  
EXPNO 1524510  
PROCNO 1

F2 - Acquisition Parameters  
Date\_ 20130703  
Time 17.17  
INSTRUM spect  
PROBHD 5 mm BBO 1H/13  
PULPROG zg30  
TD 65536  
SOLVENT CDCl3  
NS 16  
DS 2  
SWH 8012.820 Hz  
FIDRES 0.122266 Hz  
AQ 4.0894966 sec  
RG 161.3  
DW 62.400 usec  
DE 6.00 usec  
TE 300.0 K  
D1 1.00000000 sec

===== CHANNEL f1 =====  
NUC1 1H  
P1 11.75 usec  
PL1 -4.00 dB  
SFO1 400.1324710 MHz

F2 - Processing parameters  
SI 32768  
SF 400.1300000 MHz  
WDW EM  
SSB 0  
LB 0.30 Hz  
GB 0  
PC 1.00

Sample for this NMR spectra contained a small amount of 12a

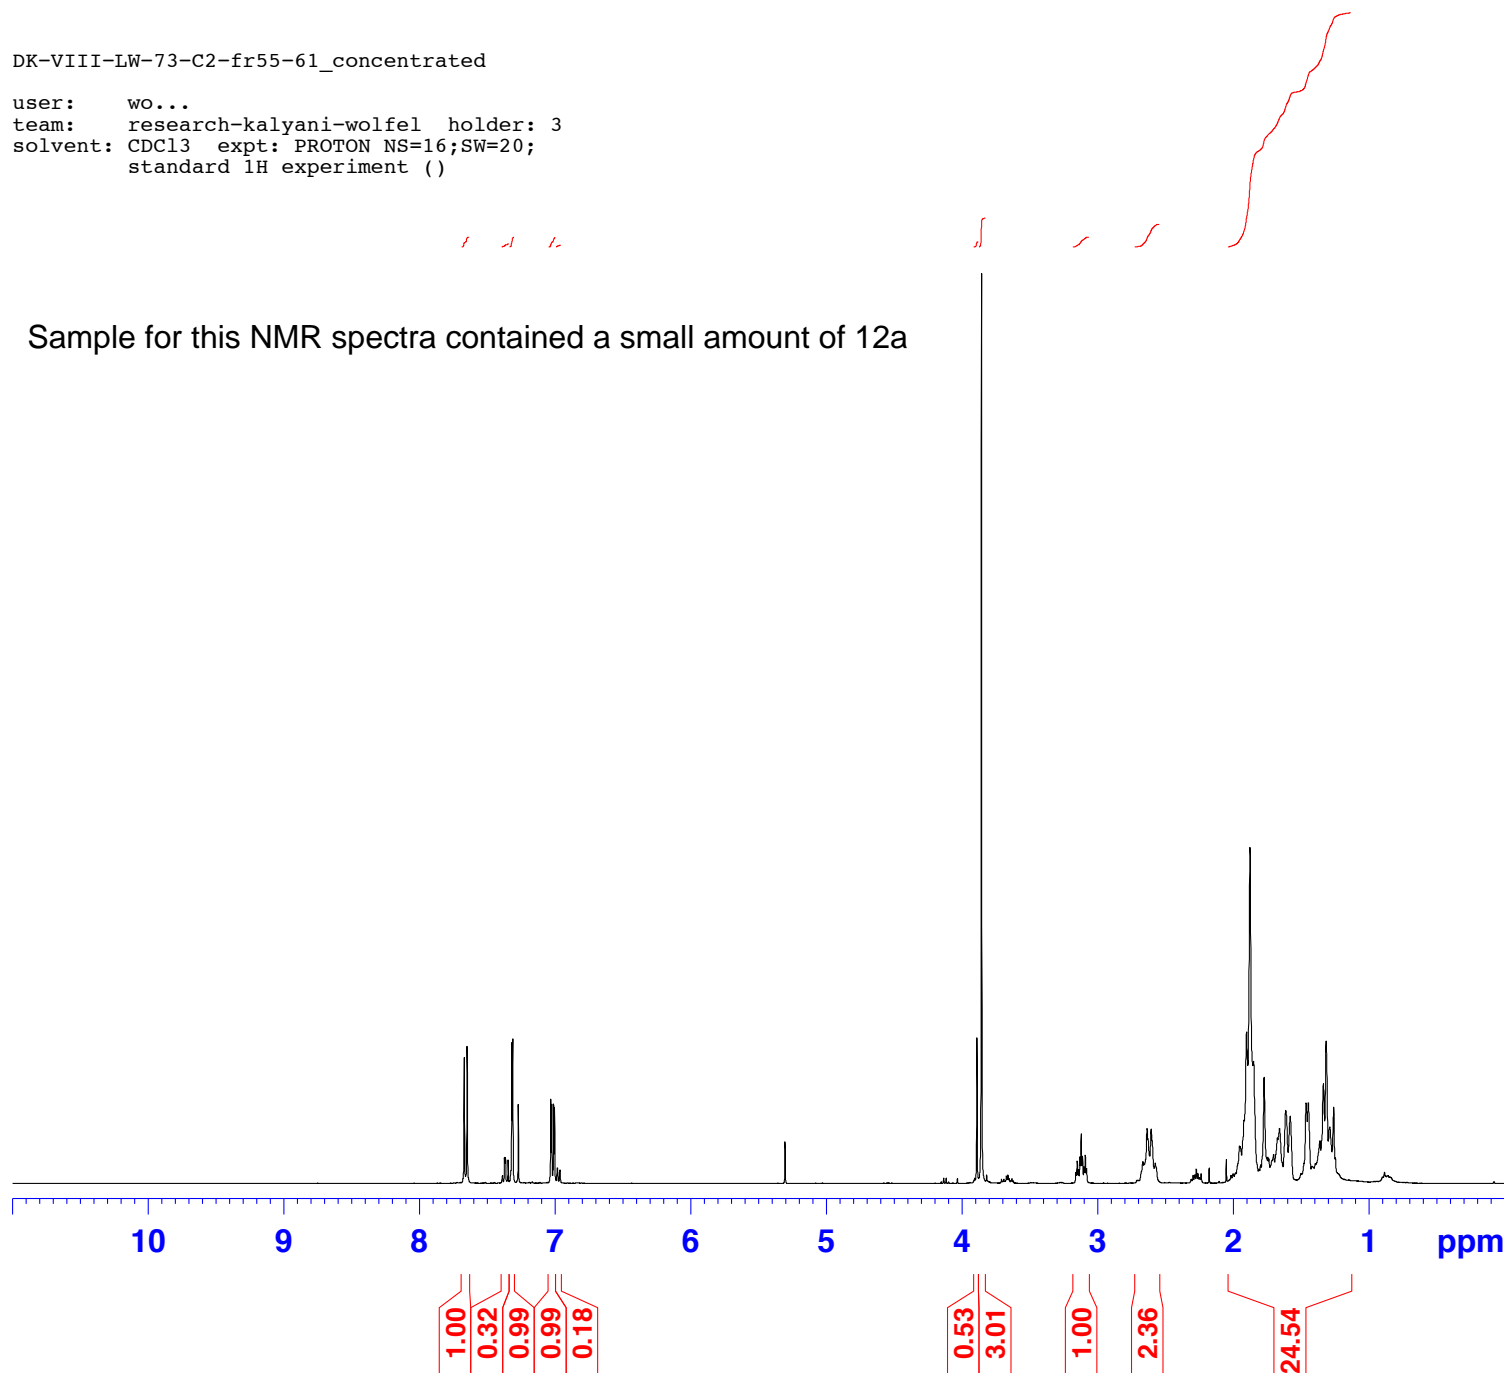

DK-VIII-LW-73-C2-fr.55-61\_concentrated

user: wo...  
team: research-kalyani-wolfel holder: 3  
solvent: CDCl3 expt: C13CPD32 NS=8000;D1=2;  
standard C13 experiment ()

Sample for this NMR spectra contained a small amount of 12a

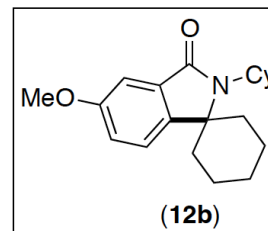

Current Data Parameters  
NAME Jul03-2013  
EXPNO 1524710  
PROCNO 1

F2 - Acquisition Parameters  
Date\_ 20130704  
Time 0.57  
INSTRUM spect  
PROBHD 5 mm BBO 1H/13  
PULPROG zgpg30  
TD 65536  
SOLVENT CDCl3  
NS 8000  
DS 2  
SWH 23980.814 Hz  
FIDRES 0.365918 Hz  
AQ 1.3664756 sec  
RG 1625.5  
DW 20.850 usec  
DE 6.00 usec  
TE 300.0 K  
D1 2.00000000 sec  
d11 0.03000000 sec  
d12 0.00002000 sec

===== CHANNEL f1 =====  
NUC1 13C  
P1 9.00 usec  
PL1 -4.50 dB  
SFO1 100.6228298 MHz

===== CHANNEL f2 =====  
CPDPRG2 waltz16  
NUC2 1H  
PCPD2 90.00 usec  
PL2 -4.00 dB  
PL12 13.68 dB  
PL13 17.24 dB  
SFO2 400.1316005 MHz

F2 - Processing parameters  
SI 32768  
SF 100.6127690 MHz  
WDW EM

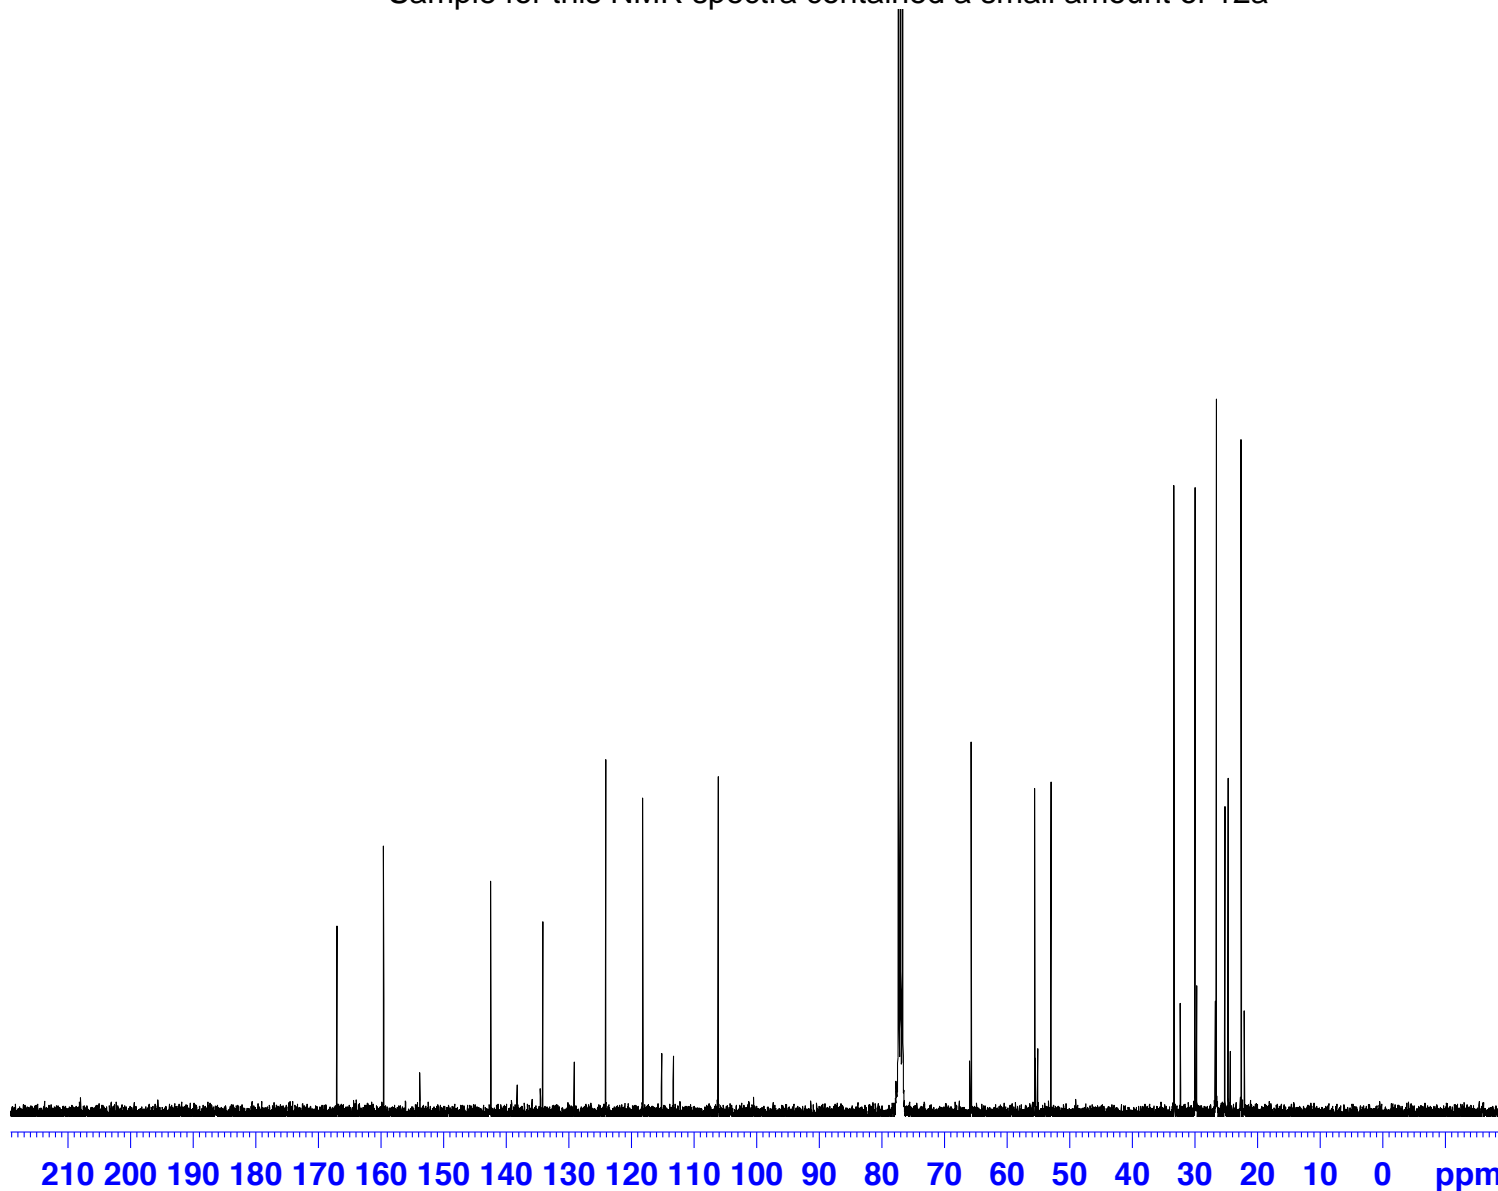

DK-XII-WW-70 Fr. 41-65 Concentrated

user: we...  
team: research-kalyani-wertjes holder: 7  
solvent: CDCl3 expt: PROTON NS=16;SW=20;  
standard 1H experiment ()

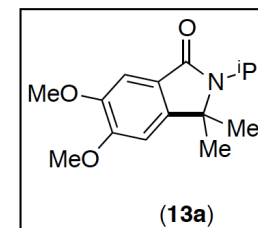

Current Data Parameters  
NAME Jun29-2013  
EXPNO 1517010  
PROCNO 1

F2 - Acquisition Parameters  
Date\_ 20130629  
Time 22.19  
INSTRUM spect  
PROBHD 5 mm BBO 1H/13  
PULPROG zg30  
TD 65536  
SOLVENT CDCl3  
NS 16  
DS 2  
SWH 8012.820 Hz  
FIDRES 0.122266 Hz  
AQ 4.0894966 sec  
RG 57  
DW 62.400 usec  
DE 6.00 usec  
TE 300.0 K  
D1 1.00000000 sec

===== CHANNEL f1 =====  
NUC1 1H  
P1 11.75 usec  
PL1 -4.00 dB  
SFO1 400.1324710 MHz

F2 - Processing parameters  
SI 32768  
SF 400.1300000 MHz  
WDW EM  
SSB 0  
LB 0.30 Hz  
GB 0  
PC 1.00

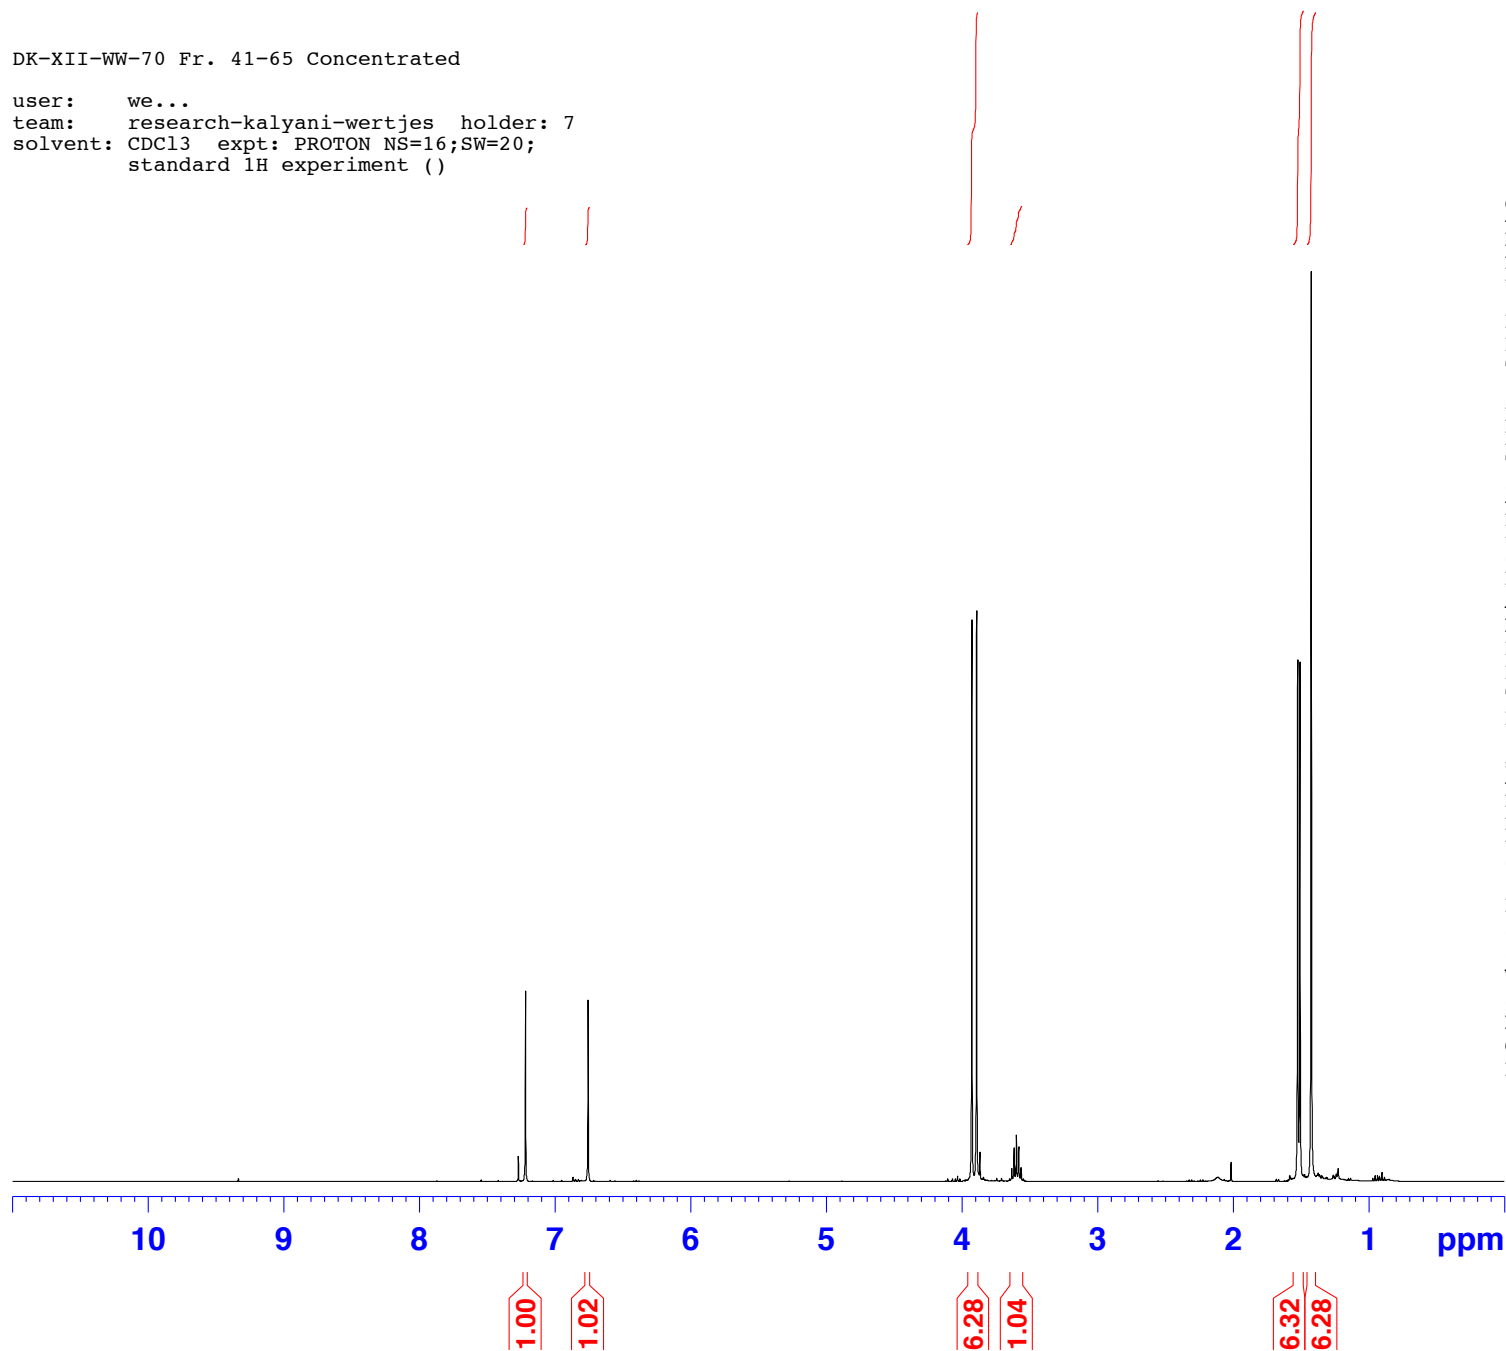



DK-XII-WW-70 Fr. 41-65 Concentrated

user: we...  
team: research-kalyani-wertjes holder: 7  
solvent: CDCl<sub>3</sub> expt: C13CPD32 NS=2048;D1=2;  
standard C13 experiment ()

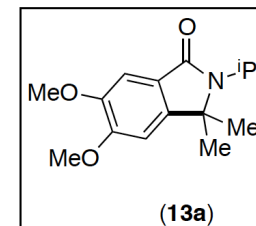

Current Data Parameters  
NAME Jun29-2013  
EXPNO 1517110  
PROCNO 1

F2 - Acquisition Parameters  
Date\_ 20130630  
Time 0.15  
INSTRUM spect  
PROBHD 5 mm BBO 1H/13  
PULPROG zgpg30  
TD 65536  
SOLVENT CDCl<sub>3</sub>  
NS 2048  
DS 2  
SWH 23980.814 Hz  
FIDRES 0.365918 Hz  
AQ 1.3664756 sec  
RG 2896.3  
DW 20.850 usec  
DE 6.00 usec  
TE 300.0 K  
D1 2.00000000 sec  
d11 0.03000000 sec  
d12 0.00002000 sec

===== CHANNEL f1 =====  
NUC1 13C  
P1 9.00 usec  
PL1 -4.50 dB  
SFO1 100.6228298 MHz

===== CHANNEL f2 =====  
CPDPRG2 waltz16  
NUC2 1H  
PCPD2 90.00 usec  
PL2 -4.00 dB  
PL12 13.68 dB  
PL13 17.24 dB  
SFO2 400.1316005 MHz

F2 - Processing parameters  
SI 32768  
SF 100.6127690 MHz  
WDW EM

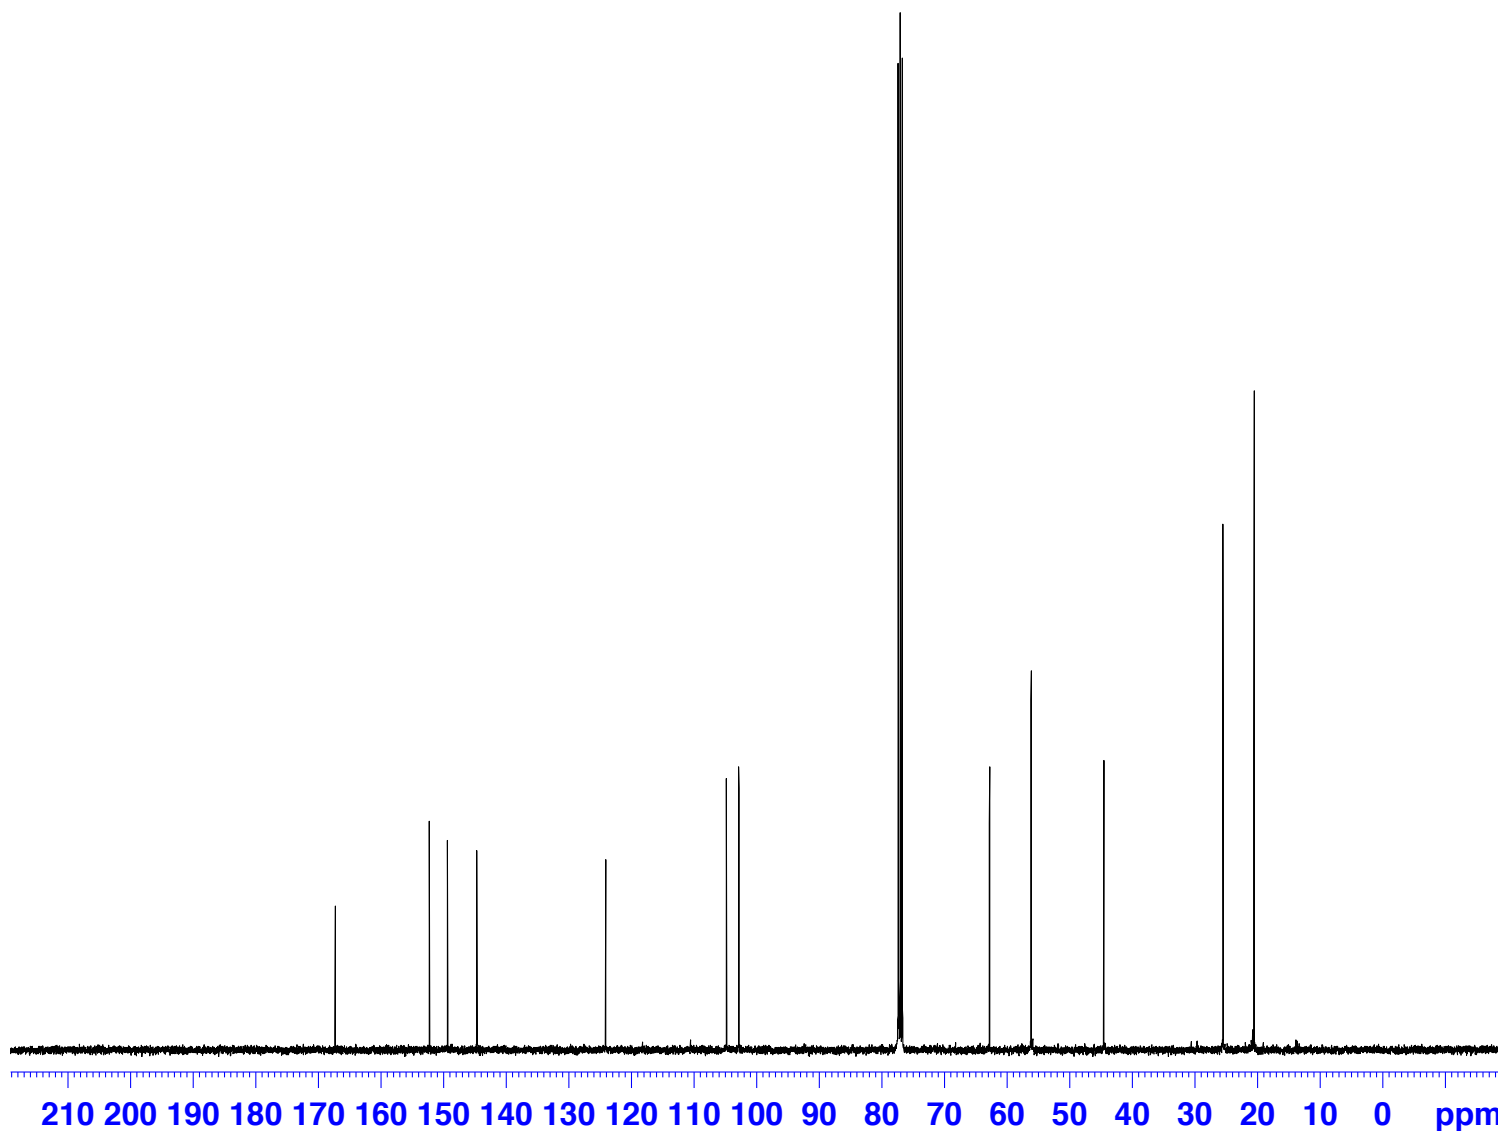

DK-XII-WW-70 Fr. 102-107 Concentrated

user: we...  
team: research-kalyani holder: 15  
solvent: CDCl3 expt: PROTON NS=16;SW=20;  
standard 1H experiment ()

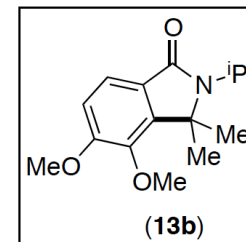

Current Data Parameters  
NAME Jul26-2013  
EXPNO 1570710  
PROCNO 1

F2 - Acquisition Parameters  
Date\_ 20130726  
Time 18.01  
INSTRUM spect  
PROBHD 5 mm BBO 1H/13  
PULPROG zg30  
TD 65536  
SOLVENT CDCl3  
NS 16  
DS 2  
SWH 8012.820 Hz  
FIDRES 0.122266 Hz  
AQ 4.0894966 sec  
RG 406.4  
DW 62.400 usec  
DE 6.00 usec  
TE 300.0 K  
D1 1.00000000 sec

===== CHANNEL f1 =====  
NUC1 1H  
P1 11.75 usec  
PL1 -4.00 dB  
SFO1 400.1324710 MHz

F2 - Processing parameters  
SI 32768  
SF 400.1300000 MHz  
WDW EM  
SSB 0  
LB 0.30 Hz  
GB 0  
PC 1.00

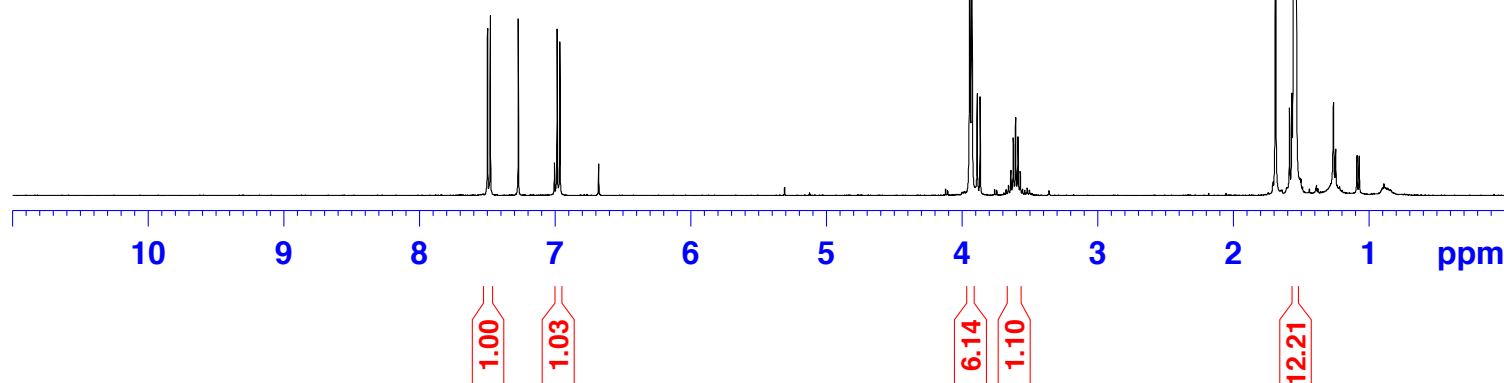

DK-XII-WW-70 Fr. 102-107 Concentrated

user: we...  
team: research-kalyani holder: 15  
solvent: CDCl<sub>3</sub> expt: C13CPD32 NS=4096;D1=2;  
standard C13 experiment ()

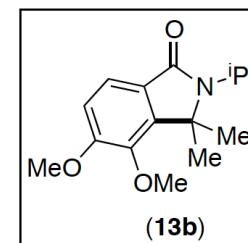

Current Data Parameters  
NAME Jul26-2013  
EXPNO 1570810  
PROCNO 1

F2 - Acquisition Parameters  
Date\_ 20130726  
Time 21.53  
INSTRUM spect  
PROBHD 5 mm BBO 1H/13  
PULPROG zgpg30  
TD 65536  
SOLVENT CDCl<sub>3</sub>  
NS 4096  
DS 2  
SWH 23980.814 Hz  
FIDRES 0.365918 Hz  
AQ 1.3664756 sec  
RG 5160.6  
DW 20.850 usec  
DE 6.00 usec  
TE 300.0 K  
D1 2.00000000 sec  
d11 0.03000000 sec  
d12 0.00002000 sec

===== CHANNEL f1 =====  
NUC1 13C  
P1 9.00 usec  
PL1 -4.50 dB  
SFO1 100.6228298 MHz

===== CHANNEL f2 =====  
CPDPRG2 waltz16  
NUC2 1H  
PCPD2 90.00 usec  
PL2 -4.00 dB  
PL12 13.68 dB  
PL13 17.24 dB  
SFO2 400.1316005 MHz

F2 - Processing parameters  
SI 32768  
SF 100.6127690 MHz  
WDW EM

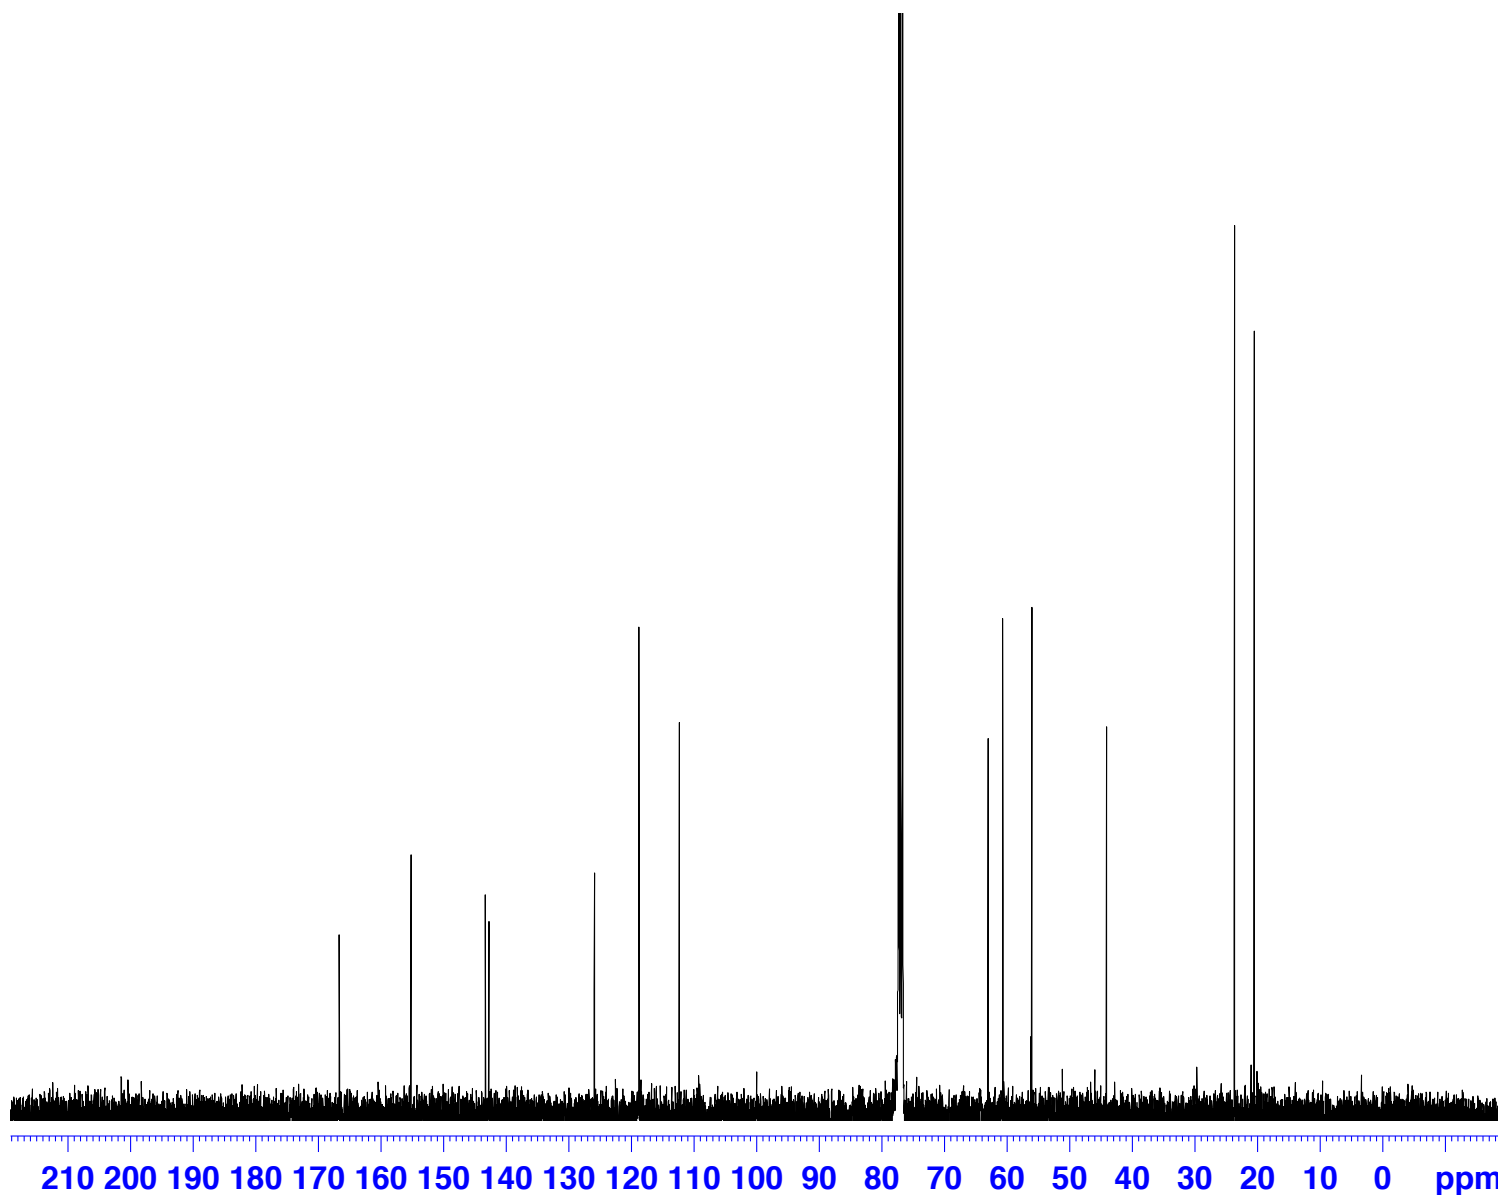

DK-VIII-LW-73 Fr. 61-78 Concentrated

user: we...  
team: research-kalyani holder: 15  
solvent: CDCl3 expt: PROTON NS=16;SW=20;  
standard 1H experiment ()

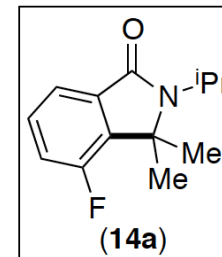

Current Data Parameters  
NAME Jul04-2013  
EXPNO 1527210  
PROCNO 1

F2 - Acquisition Parameters  
Date\_ 20130705  
Time 1.36  
INSTRUM spect  
PROBHD 5 mm BBO 1H/13  
PULPROG zg30  
TD 65536  
SOLVENT CDCl3  
NS 16  
DS 2  
SWH 8012.820 Hz  
FIDRES 0.122266 Hz  
AQ 4.0894966 sec  
RG 203.2  
DW 62.400 usec  
DE 6.00 usec  
TE 300.0 K  
D1 1.00000000 sec

===== CHANNEL f1 =====  
NUC1 1H  
P1 11.75 usec  
PL1 -4.00 dB  
SFO1 400.1324710 MHz

F2 - Processing parameters  
SI 32768  
SF 400.1300000 MHz  
WDW EM  
SSB 0  
LB 0.30 Hz  
GB 0  
PC 1.00

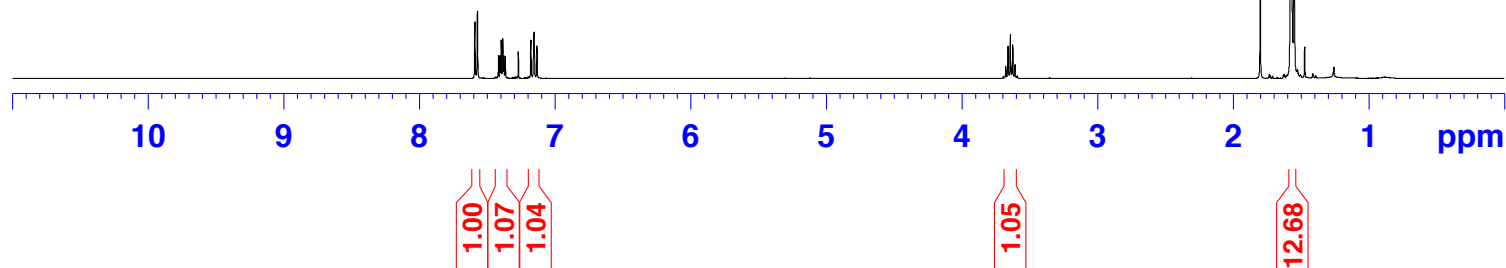

DK-VIII-LW-73 Fr. 61-78 Concentrated

user: we...  
team: research-kalyani holder: 15  
solvent: CDCl<sub>3</sub> expt: C13CPD32 NS=4096;D1=2;  
standard C13 experiment ()

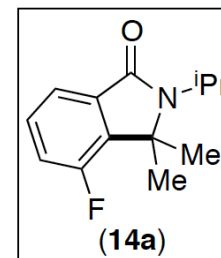

Current Data Parameters  
NAME Jul04-2013  
EXPNO 1527310  
PROCNO 1

F2 - Acquisition Parameters  
Date\_ 20130705  
Time 5.27  
INSTRUM spect  
PROBHD 5 mm BBO 1H/13  
PULPROG zgpg30  
TD 65536  
SOLVENT CDCl<sub>3</sub>  
NS 4096  
DS 2  
SWH 23980.814 Hz  
FIDRES 0.365918 Hz  
AQ 1.3664756 sec  
RG 1824.6  
DW 20.850 usec  
DE 6.00 usec  
TE 300.0 K  
D1 2.00000000 sec  
d11 0.03000000 sec  
d12 0.00002000 sec

===== CHANNEL f1 =====  
NUC1 13C  
P1 9.00 usec  
PL1 -4.50 dB  
SFO1 100.6228298 MHz

===== CHANNEL f2 =====  
CPDPRG2 waltz16  
NUC2 1H  
PCPD2 90.00 usec  
PL2 -4.00 dB  
PL12 13.68 dB  
PL13 17.24 dB  
SFO2 400.1316005 MHz

F2 - Processing parameters  
SI 32768  
SF 100.6127690 MHz  
WDW EM

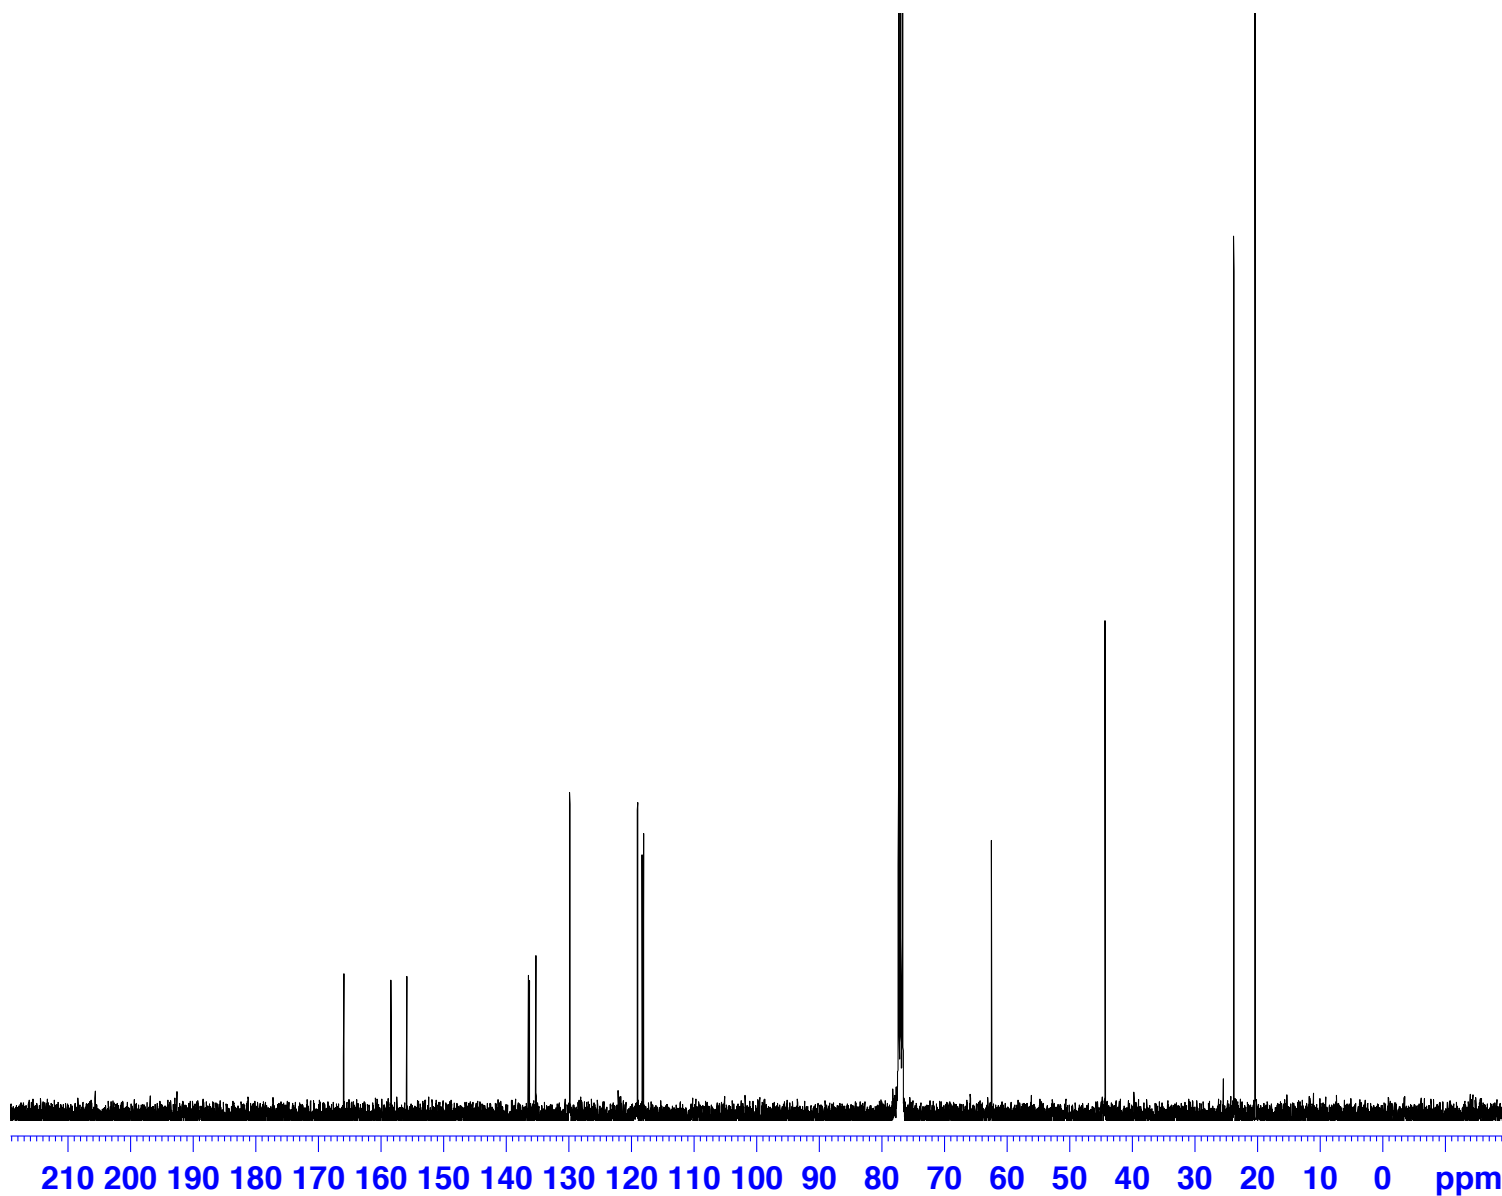

DK-VIII-LW-73 Fr. 48-53 Concentrated

user: we...  
team: research-kalyani holder: 13  
solvent: CDCl3 expt: PROTON NS=16;SW=20;  
standard 1H experiment ()

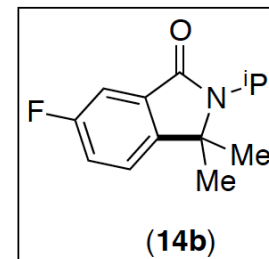

Current Data Parameters  
NAME Jul04-2013  
EXPNO 1527010  
PROCNO 1

F2 - Acquisition Parameters  
Date\_ 20130704  
Time 21.39  
INSTRUM spect  
PROBHD 5 mm BBO 1H/13  
PULPROG zg30  
TD 65536  
SOLVENT CDCl3  
NS 16  
DS 2  
SWH 8012.820 Hz  
FIDRES 0.122266 Hz  
AQ 4.0894966 sec  
RG 362  
DW 62.400 usec  
DE 6.00 usec  
TE 300.0 K  
D1 1.00000000 sec

===== CHANNEL f1 =====  
NUC1 1H  
P1 11.75 usec  
PL1 -4.00 dB  
SFO1 400.1324710 MHz

F2 - Processing parameters  
SI 32768  
SF 400.1300000 MHz  
WDW EM  
SSB 0  
LB 0.30 Hz  
GB 0  
PC 1.00

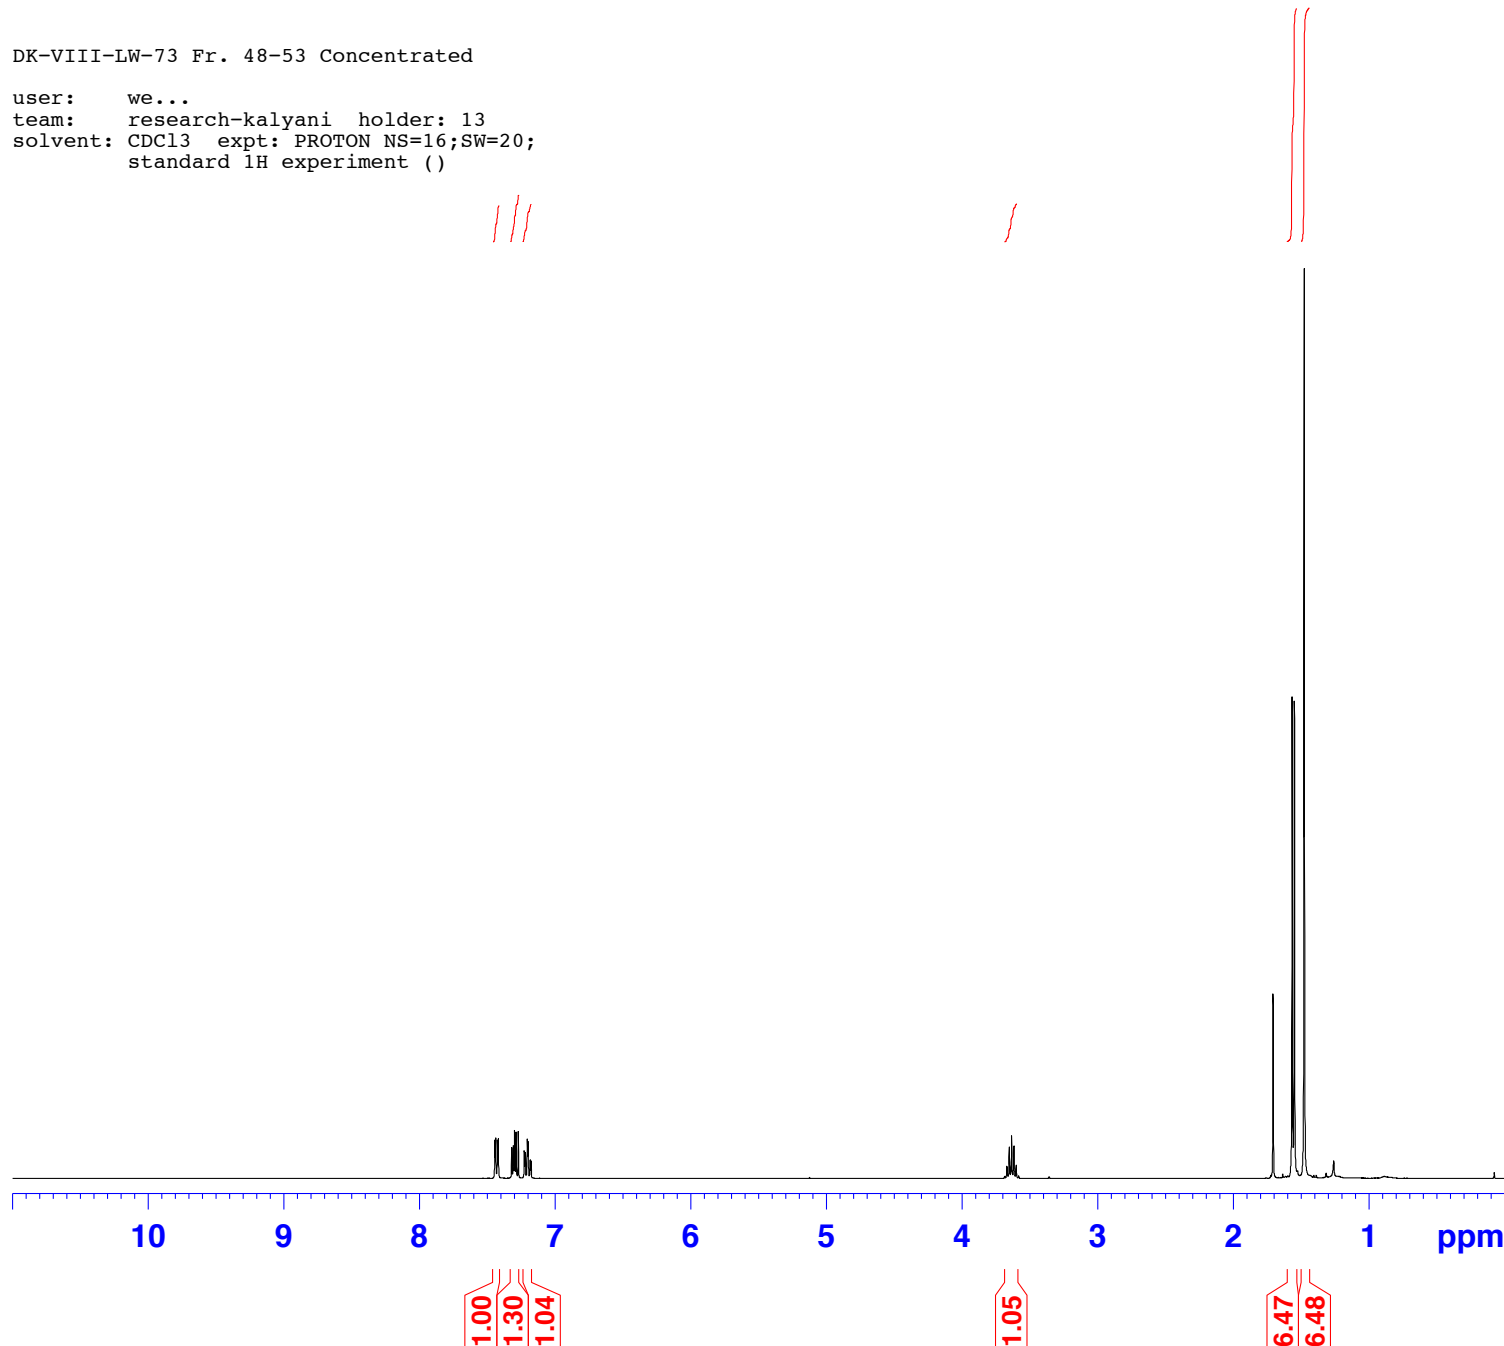

DK-VIII-LW-73 Fr. 48-53 Concentrated

user: we...  
team: research-kalyani holder: 10  
solvent: CDCl<sub>3</sub> expt: C13CPD32 NS=5500;D1=2;  
standard C13 experiment ()

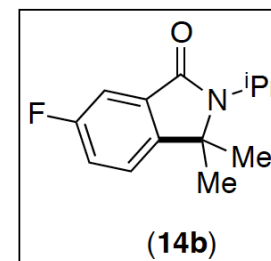

Current Data Parameters  
NAME Jul05-2013  
EXPNO 1529710  
PROCNO 1

F2 - Acquisition Parameters  
Date\_ 20130706  
Time 10.17  
INSTRUM spect  
PROBHD 5 mm BBO 1H/13  
PULPROG zgpg30  
TD 65536  
SOLVENT CDCl<sub>3</sub>  
NS 5500  
DS 2  
SWH 23980.814 Hz  
FIDRES 0.365918 Hz  
AQ 1.3664756 sec  
RG 3251  
DW 20.850 usec  
DE 6.00 usec  
TE 300.0 K  
D1 2.00000000 sec  
d11 0.03000000 sec  
d12 0.00002000 sec

===== CHANNEL f1 =====  
NUC1 13C  
P1 9.00 usec  
PL1 -4.50 dB  
SFO1 100.6228298 MHz

===== CHANNEL f2 =====  
CPDPRG2 waltz16  
NUC2 1H  
PCPD2 90.00 usec  
PL2 -4.00 dB  
PL12 13.68 dB  
PL13 17.24 dB  
SFO2 400.1316005 MHz

F2 - Processing parameters  
SI 32768  
SF 100.6127690 MHz  
WDW EM

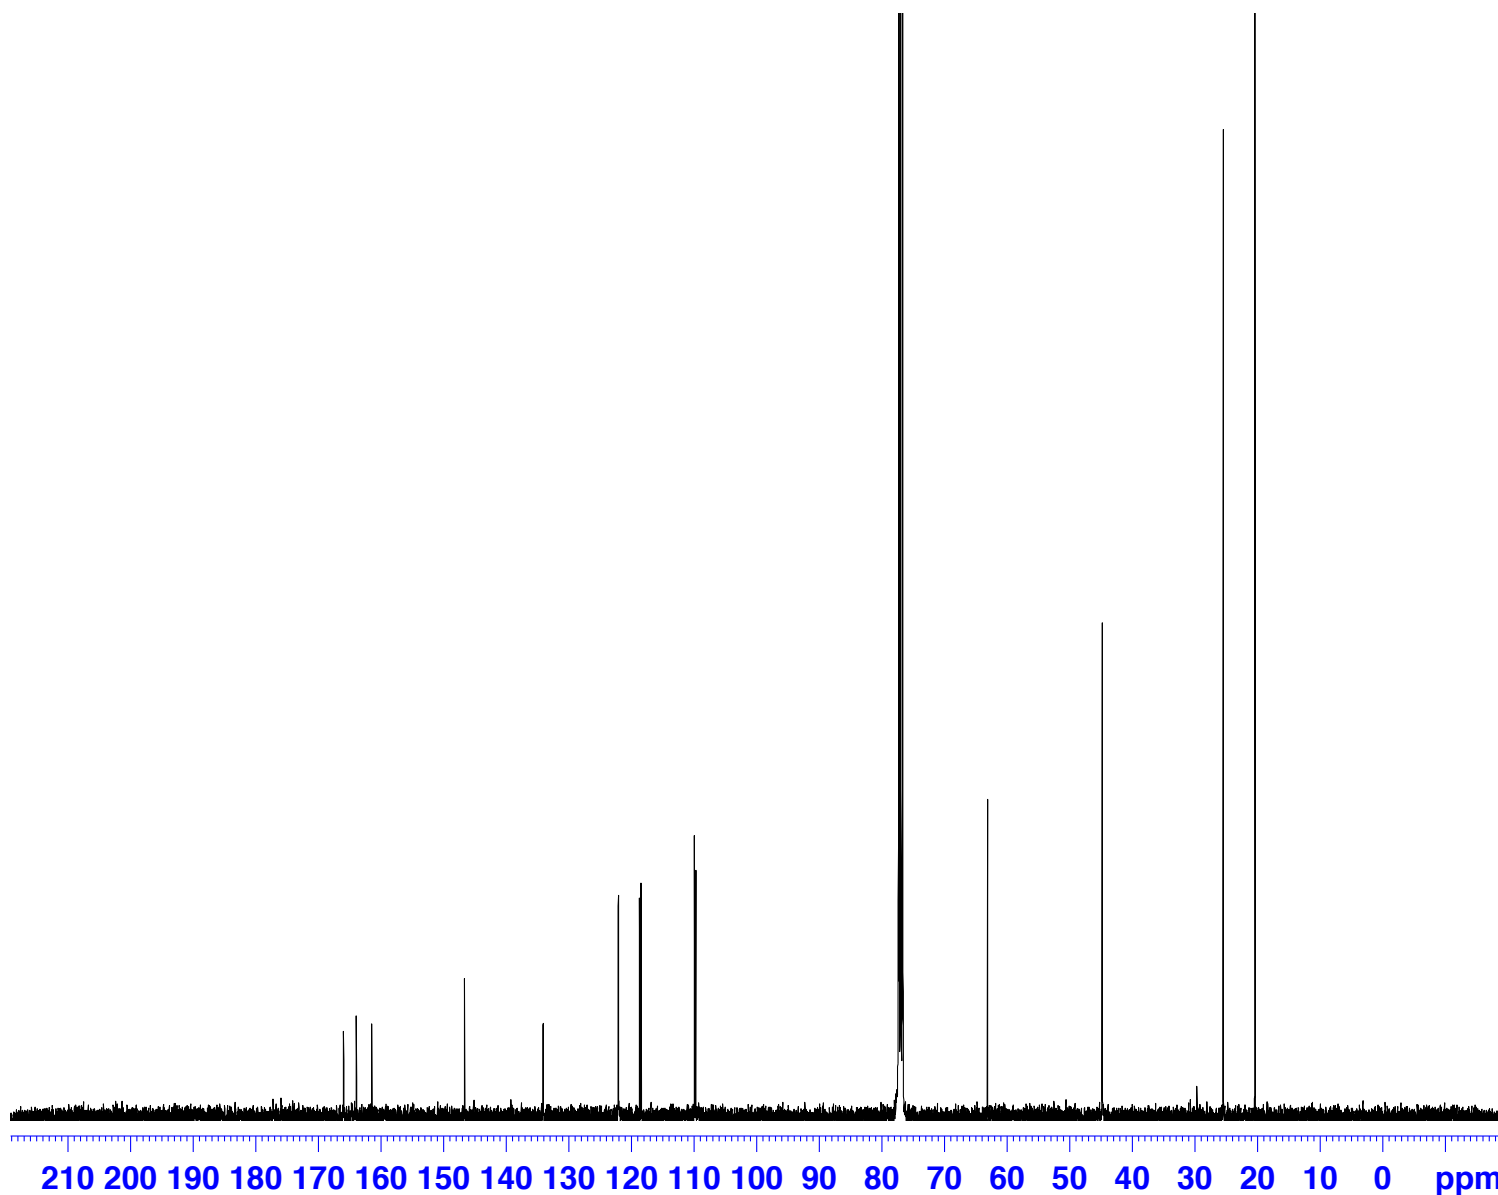

Supplement: NIHMS543227-supplement-1_si_002.pdf [file NIHMS543227-supplement-1_si_002.pdf]
